# Supplementary material
Source: PubMed Central journal article supplement (PMC5509561)
Supplement: NIHMS858333-supplement-Supplemental_figures.pdf [file NIHMS858333-supplement-Supplemental_figures.pdf]

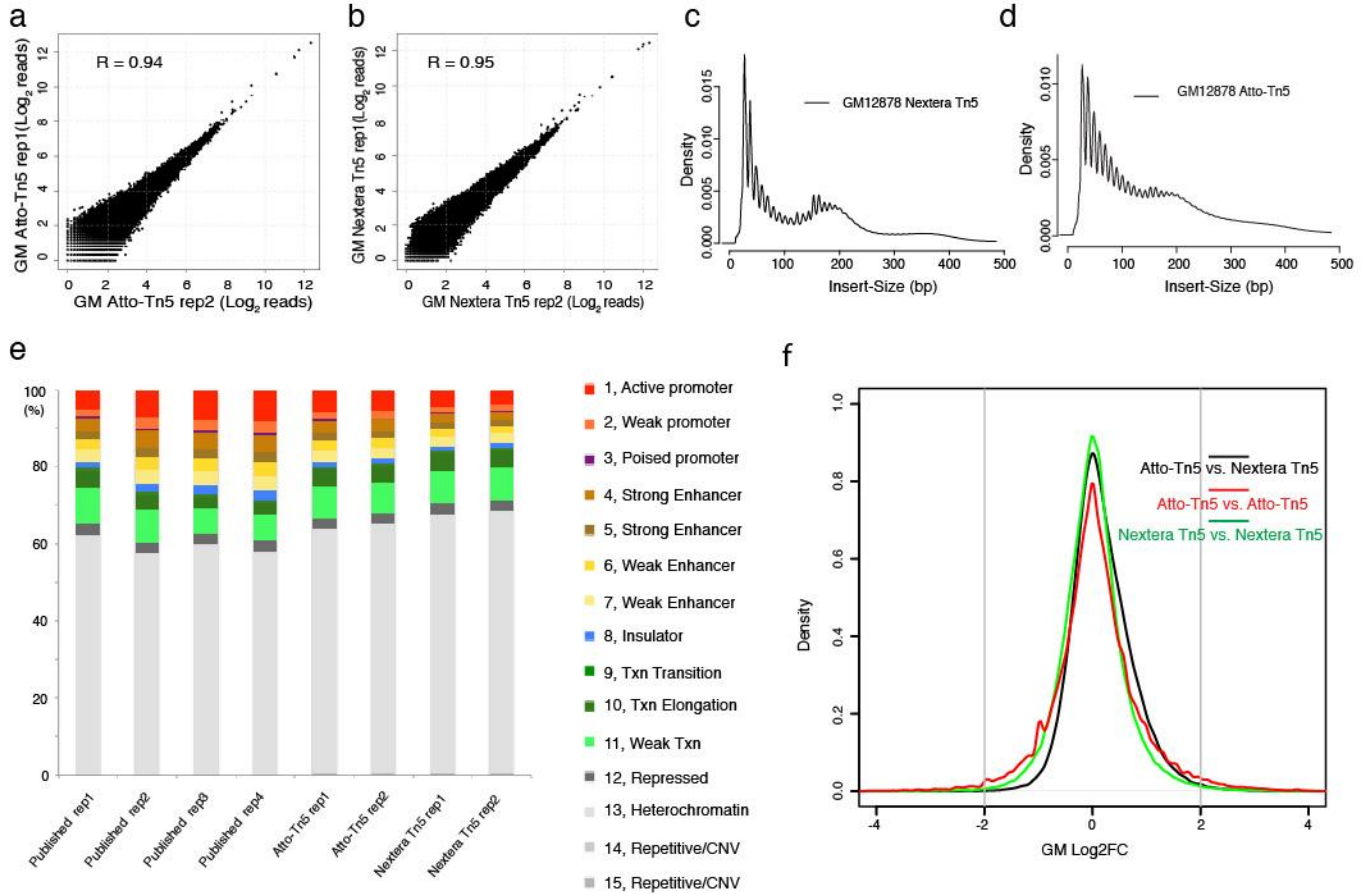

## Supplementary Figure 1

### Validation of ATAC-seq library from Atto-Tn5

**a**, genome-wide comparisons of ATAC-seq reproducibility with Atto-Tn5 in GM12878 cells (GM). **b**, genome-wide comparisons of ATAC-seq reproducibility with Nextera Tn5 in GM12878 cells (GM). **c**, Insert size distribution of GM12878 ATAC-seq libraries transposed by Nextera Tn5. **d**, Insert size distribution of GM12878 cells ATAC-seq libraries from Atto-Tn5. **e**, Calculation of regulatory element enrichment from ChromHMM in previously published GM12878 ATAC-seq libraries and new ATAC-seq libraries using either Atto-Tn5 or Illumina Nextera Tn5. **f**: density plot of differential ATAC-seq peaks fold change (FC)(log<sub>2</sub> value) in GM12878 from Atto-Tn5 and Nextera Tn5 among technical replicates and different enzyme.

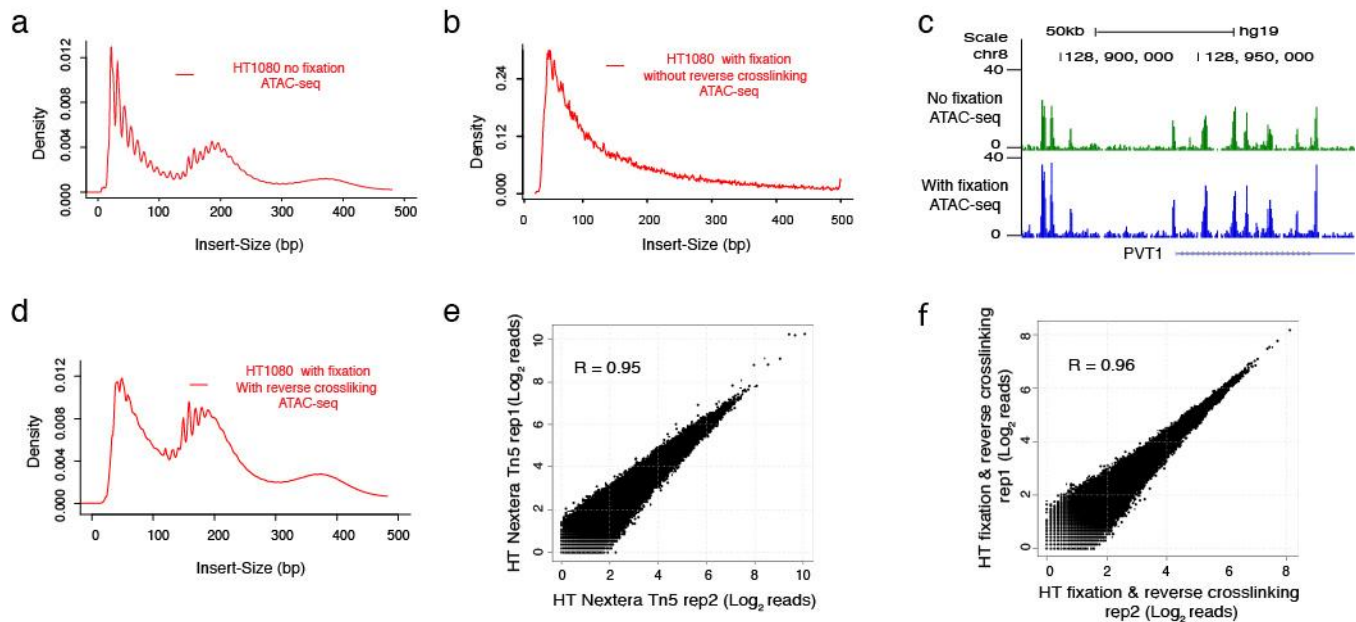

## Supplementary Figure 2

### Validation of ATAC-seq library in fixed cells

**a**, Insert size distribution of HT1080 cells ATAC-seq with standard protocol. **b**, Insert size distribution of fixed HT1080 cells ATAC-seq without reverse crosslinking step. **c**, Genomic tracks of ATAC-seq data from HT1080 cells among different conditions: No fixation, with fixation. X-axis is genomic coordinates; Y-axis is normalized ATAC-seq read counts. **d**, Insert size distribution of fixed HT1080 cells ATAC-seq with reverse crosslinking step. **e**, genome-wide comparisons of ATAC-seq reproducibility with Nextera Tn5 in non-fixed HT1080 cells (HT). **f**, genome-wide comparisons of ATAC-seq reproducibility with Nextera Tn5 in fixed HT1080 cells (HT) with reverse crosslinking.

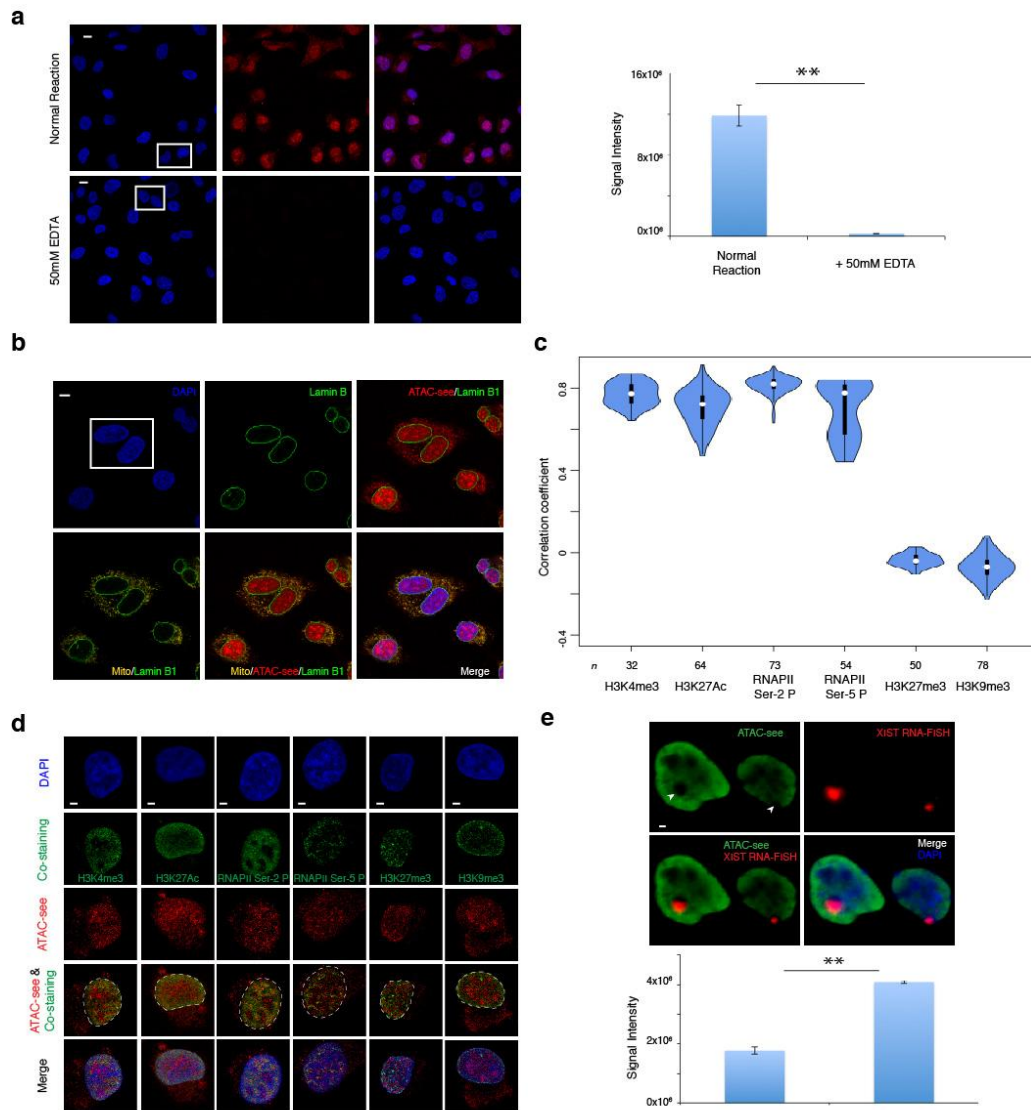

### Supplementary Figure 3

#### Confirmation of ATAC-see principle

**a**, Left: representative whole frame images of ATAC-see from normal reaction and with 50 mM EDTA treated in HT1080 cells. The white squares in the DAPI channel indicate the cropped cells in Figure 2a. Scale bar=2  $\mu$ m. Right: Signal intensity of ATAC-see was quantified in both normal reaction and 50mM EDTA control samples. 20 cells were counted in each condition with independent replication, \*\* ( $p < 0.005$ , student t-test), error bar is standard deviation. **b**, Representative whole frame images of ATAC-see co-staining with Lamin B1 and mitochondria protein marker (Mito) in HT1080 cells. The white square in the DAPI channel indicates the cropped cells in Figure 2b. Scale bar=2  $\mu$ m. **c**, Correlation coefficient of ATAC-see with different epigenetic markers and active form of RNAP II in HT1080 cells ( $n$ = cell number); RNAPII Ser-2 P = RNA polymerase II phosphorylation ser-2, and RNAPII Ser-5 P= RNA polymerase II phosphorylation ser-5. **d**, Representative images of ATAC-see co-staining with different epigenetic markers and active form of RNAP II in HT1080 cells. **e**, ATAC-see and XIST RNA-FISH in mouse Neural Progenitor Cells. Upper panel: representative images (the white arrows in the ATAC-see panel indicate the location of XIST RNA FISH signal); lower panel: signal intensity quantification of ATAC-see within and outside of XIST area. 30 cells were counted in each condition with independent replicate, \*\* ( $p < 0.005$ , student t-test), error bar is standard deviation.

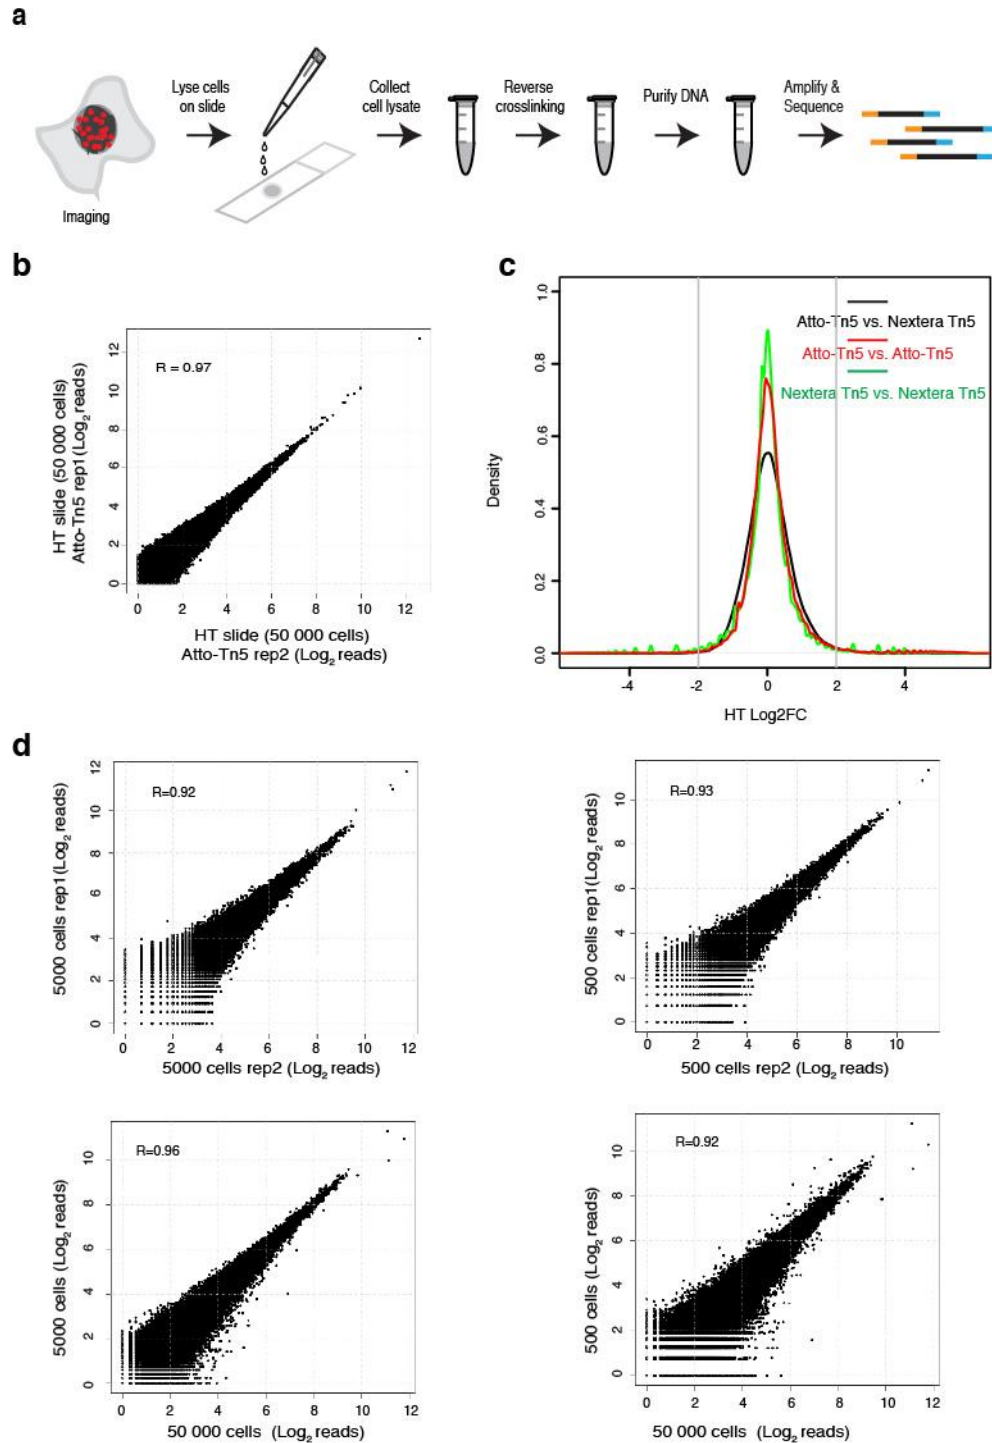

## Supplementary Figure 4

### Validation of ATAC-seq library after ATAC-seq imaging

**a**, Schematic workflow of ATAC-seq library preparation after ATAC-seq imaging. **b**, genome-wide comparisons of ATAC-seq reproducibility with Atto-Tn5 on slides from HT1080 cells (HT). **c**, density plot of differential ATAC-seq peaks fold change (FC)(log<sub>2</sub> value) in HT1080(HT) from Atto-Tn5 (on slide) and Nextera Tn5 (in solution) among technical replicates and different enzyme. **d**, Sensitivity assay (with different input) of global DNA accessibility of ATAC-seq after imaging (on slides) from HT1080 cells.

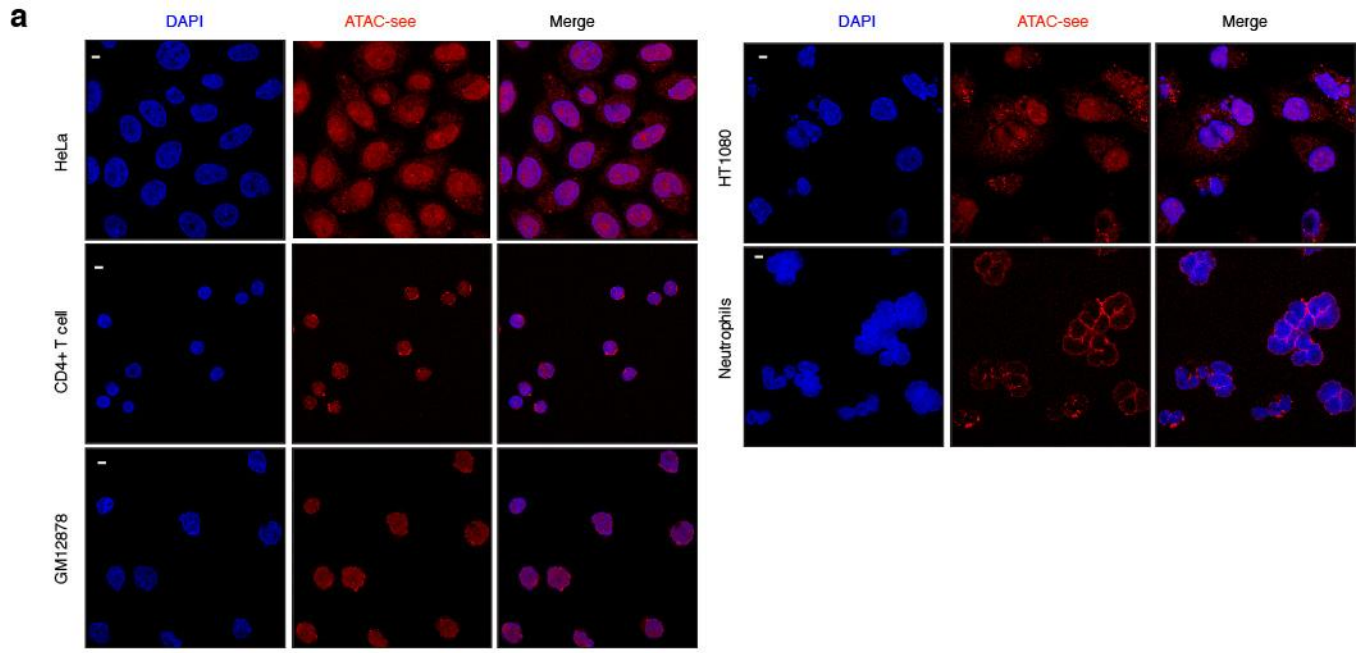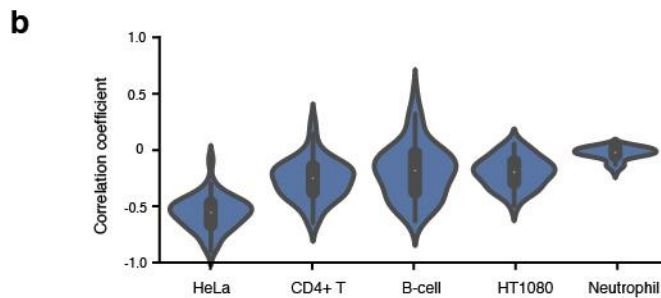

### Supplementary Figure 5

#### ATAC-seq in different cell types

**a**, Representative whole frame images of ATAC-seq from different cell types. Scale bar=2  $\mu$ m. Multi images ( $n>5$ ) were taken in each cell type with independent replicates. **b**, Cell type specific accessible chromatin organization in the intact nucleus. The violin plot represents of the correlation coefficients between ATAC-seq signal and DAPI signal per nucleus in different cell types. Each cell type has a unique profile, and neutrophils stand out as an outlier. B-cell = B-lymphoblastoid GM12878 cells.

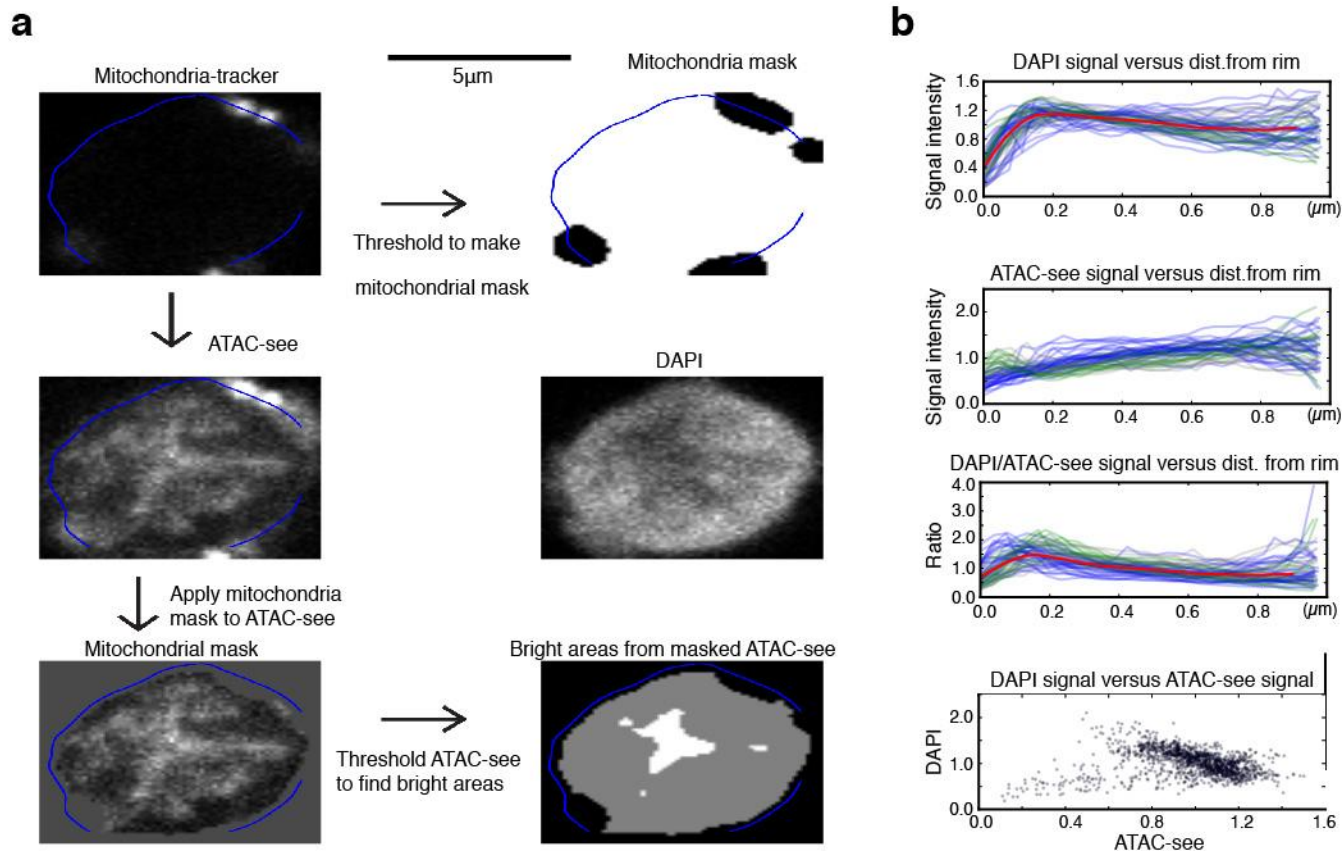

**Supplementary Figure 6**

### Systematic imaging processing of ATAC-seq

**a**, Schematic of image processing workflow of making mitochondria masks from ATAC-seq and define the bright area of ATAC-seq signal in the nucleus. **b**, Analysis of two different ATAC-seq patterns in CD4<sup>+</sup> T cells. The two plots in the upper panel represent the radial distribution of ATAC-seq signal intensity and DAPI signal intensity in two different groups of CD4<sup>+</sup> T cells. The blue line shows the ATAC-seq signal intensity is low at the nucleus periphery, the green line illustrates the ATAC-seq signal form a rim structure at the nucleus periphery (“Cap pattern”) and the red line indicates the means of all signal intensity. The line plot in the middle panel shows the ratio of ATAC-seq signal intensity and DAPI signal intensity among the population cells. The red lines in the plot represent the average values of single intensity from all groups. The scatter plot in the lower panel represents the correlation of ATAC-seq signal intensity and DAPI signal intensity.

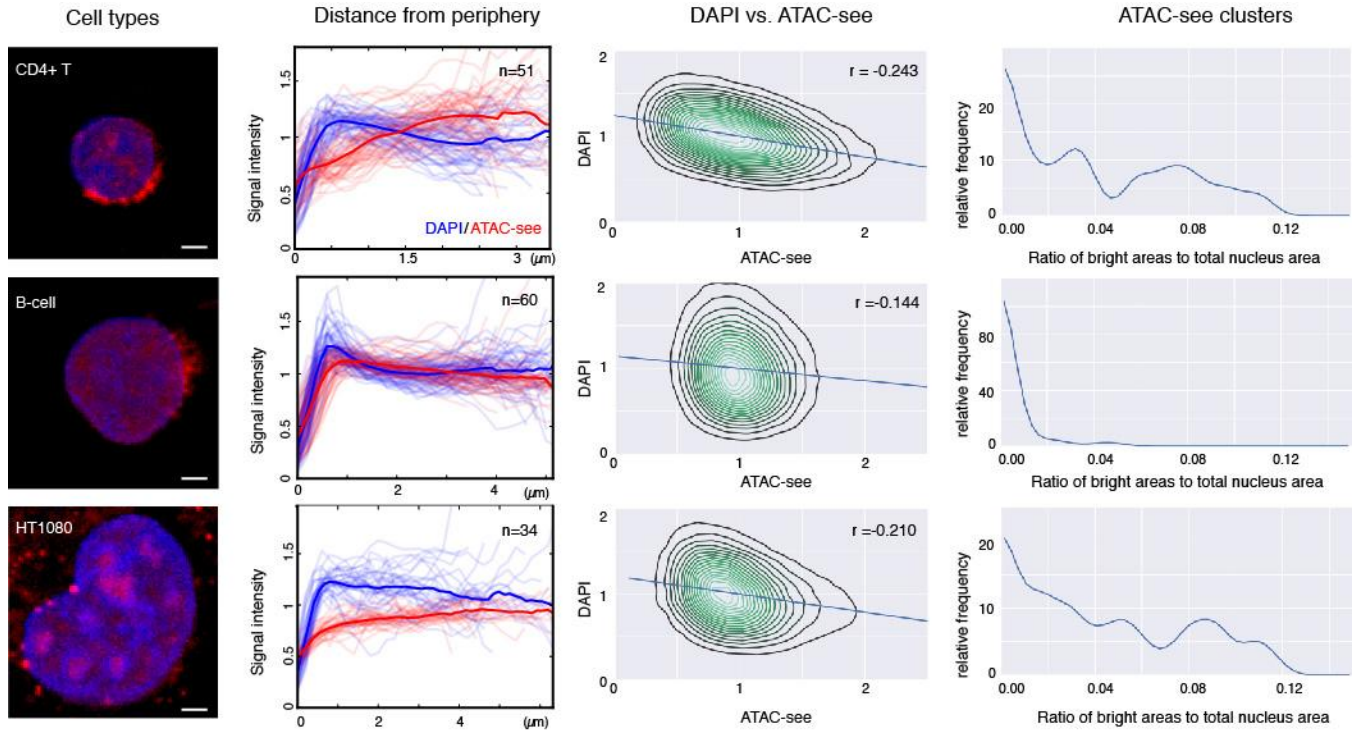

**Supplementary Figure 7**

**Cell type specific accessible chromatin organization in the intact nucleus.**

For each cell type (organized in rows), we display from left to right columns: **(i)** A representative ATAC-see image (red color is ATAC-see and blue is DAPI, scale bar = 2  $\mu\text{m}$ ). **(ii)** Signal intensity of ATAC-see and DAPI as a function of distance from nuclear periphery. Each trace is one nucleus;  $n$  = number of nuclei analyzed. **(iii)** Correlation of ATAC-see and DAPI signal intensity; Pearson correlation ( $r$ ) is indicated. **(iv)** ATAC-see clusters, quantified as the ratio of ATAC-see bright areas vs total nucleus area.

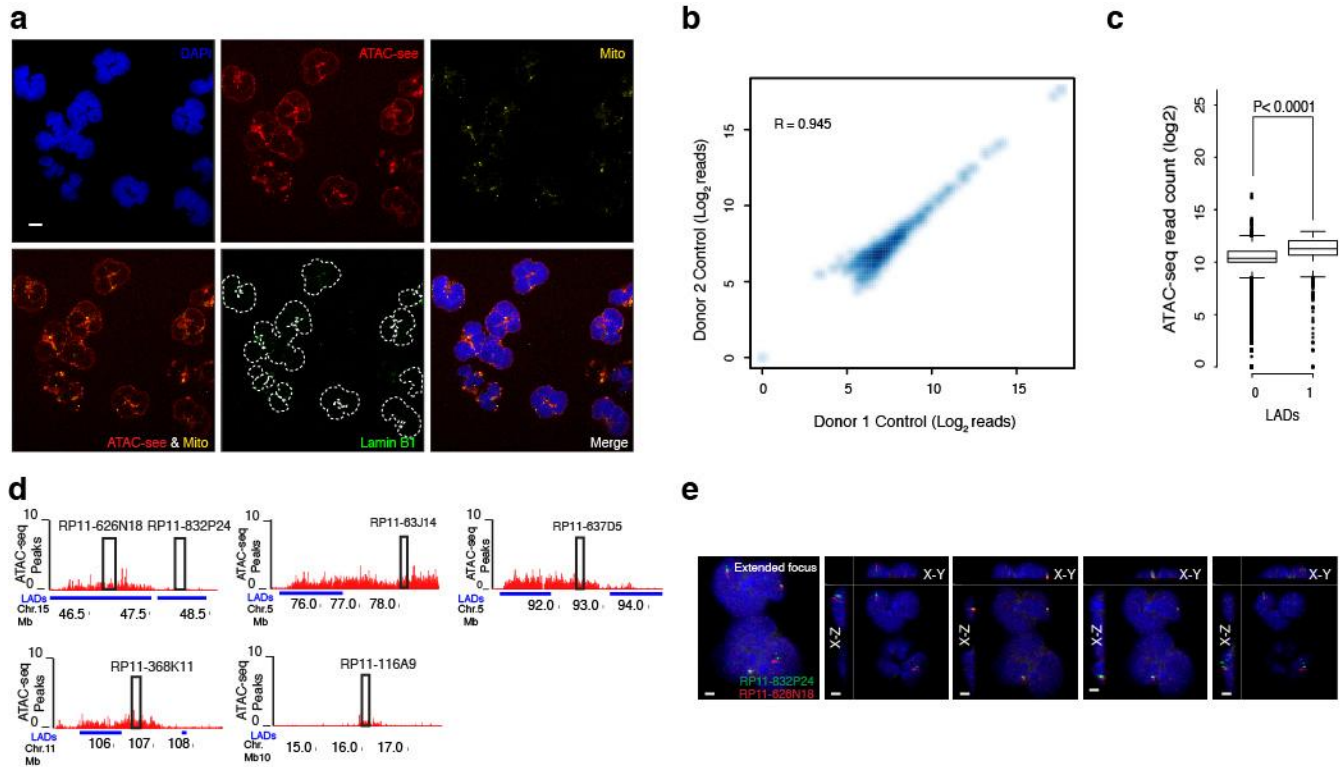

**Supplementary Figure 8**

### Unique pattern of ATAC-seq in the human neutrophil

**a**, Representative whole frame images show ATAC-seq co-staining with Lamin B1 and mitochondria protein marker (Mito) in human neutrophils. The dotted lines in the Lamin B1 panel show the location of the nucleus periphery based on DAPI staining. Multi images ( $n > 5$ ) were taken with independent replicates. Scale bar = 2  $\mu\text{m}$ . **b**, The similarity of ATAC-seq libraries after imaging (on slide) with ATTO-590 from different donors. **c**, The boxplot represents the ATAC-seq peaks enrichment within NKI LADs and outside of NKI LADs, 0 = outside of LADs, 1 = within LADs. **d**, the black squares show the location of BAC clones chosen for DNA FISH according to the genomic tracks of ATAC-seq data in human neutrophil; BAC clones were chosen from both LAD region (RP11-626N18, RP11-832P24) and non-LAD regions (RP11-63J14, RP11-637D5, RP11-368K11, RP11-116A9). **e**, Representative DNA FISH image in human neutrophils: the left panel: extended focus, right four panels: side view of 3D images. X-Y = X dimension and Y dimension, X-Z = X dimension and Z dimension. Scale bar = 2  $\mu\text{m}$ .



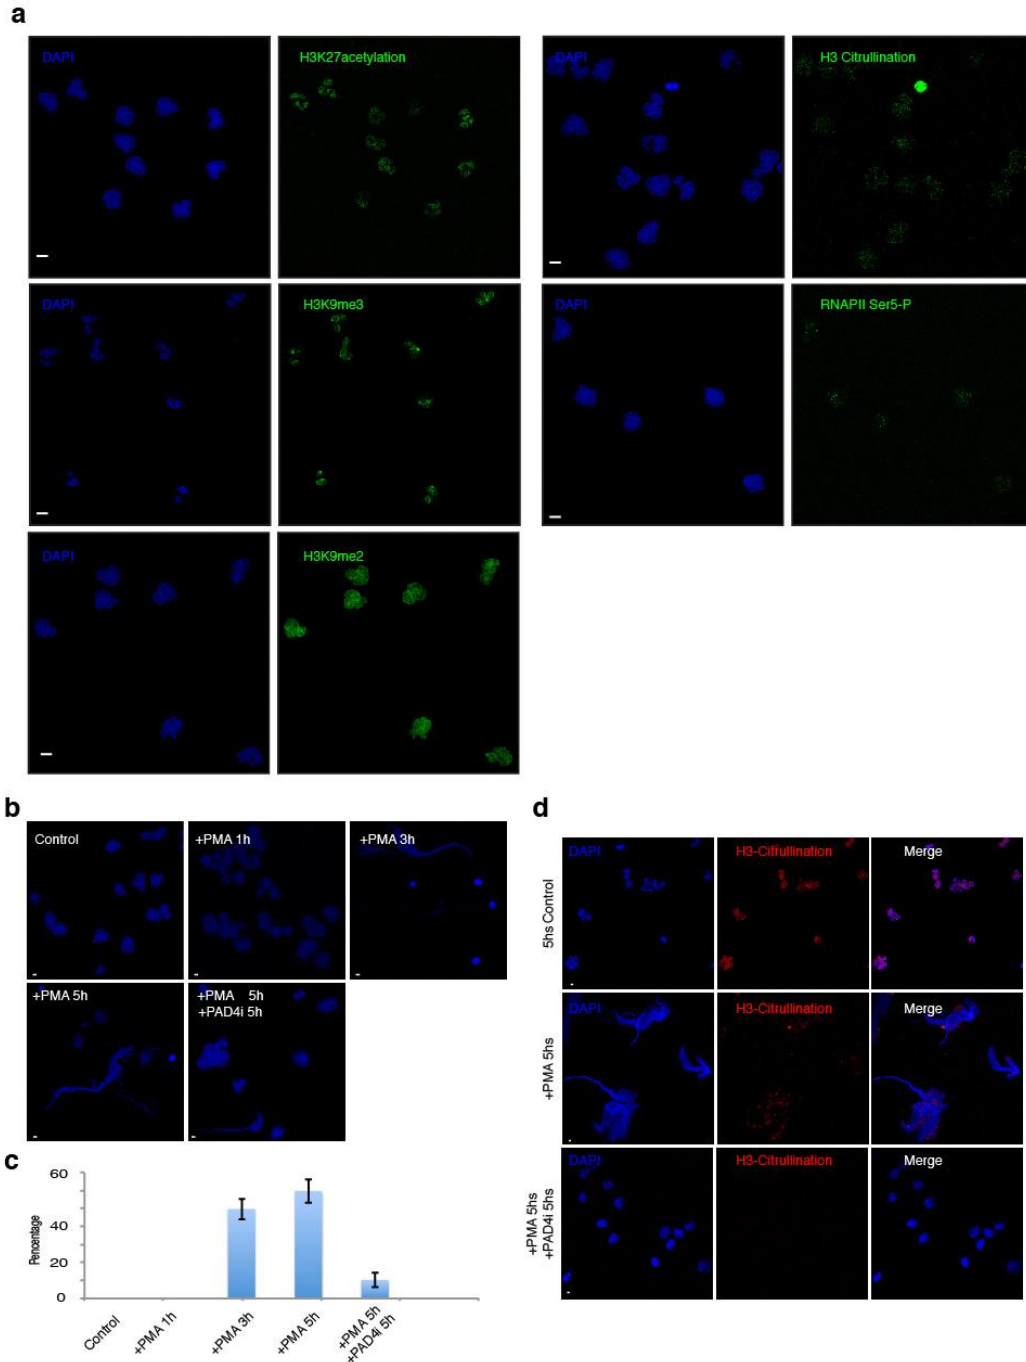

## Supplementary Figure 9

### Immunostaining in human neutrophils and NETosis

**a**, Immunostaining of epigenetic markers in human neutrophil. RNAPII Ser-5 P= RNA polymerase II phosphorylation ser-5. Multi images ( $n>5$ ) were taken with independent replicates in each staining. **b**, The representative images show DAPI staining of control, PMA and PAD4 inhibitor (PAD4i) treated human neutrophils. Scale bar= $2\ \mu\text{m}$ . **c**, The bar graph presents the quantification of NETosis in PMA and PAD4 inhibitor treated human neutrophils based on DAPI staining, Error bar= standard deviation;  $n=60\times 2$  for each condition. **d**, Representative whole frame images of H3 citrullination staining in control, 5 h PMA treated and 5 h PAD4 inhibitor (PAD4i) treated human neutrophils. Multi images ( $n=5\times 2$ ) were taken in each condition. Scale bar= $2\ \mu\text{m}$ .

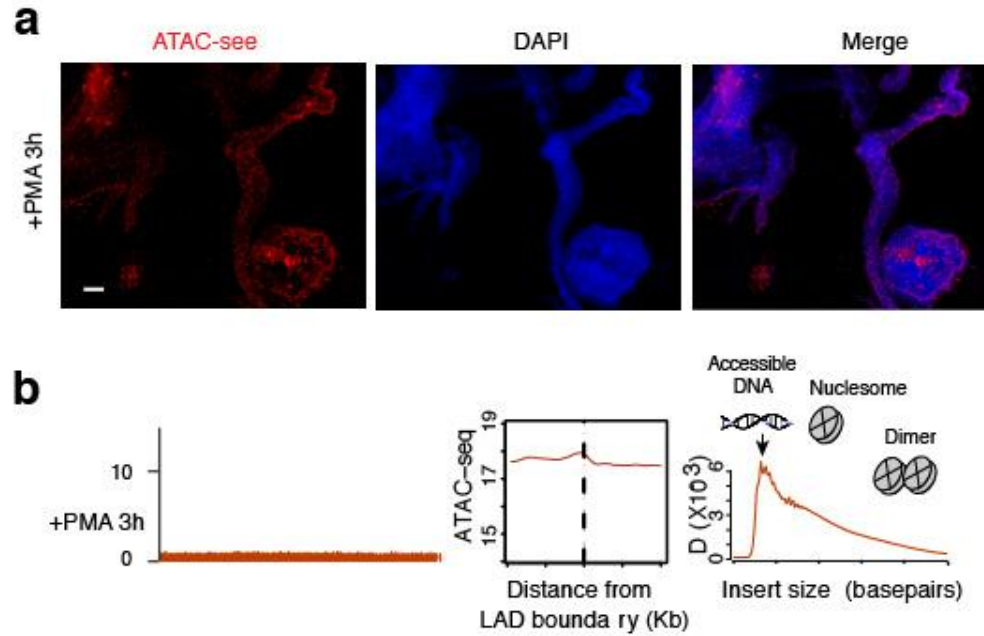

**Supplementary Figure 10**

**ATAC-seq and -see in the human NETosis.**

**a**, Representative images ATAC-seq in 3h PMA stimulation human neutrophils. Scale bar=2  $\mu$ m.

**b**, Epigenomic landscape of 3h PMA stimulation human neutrophils. Left column: Genomic tracks of ATAC-seq data. Locations of NKI Lamin associated domains (LADs) are indicated. X-axis is genomic coordinates; Y-axis is ATAC-seq normalized read counts. Middle: Metagene plot of ATAC-seq signal centered on the boundary between NKI LADs and neighboring sequences. Right: ATAC-seq insert size distribution for the corresponding samples. Diagnostic insert sizes for accessible DNA, mononucleosome, and di-nucleosome are labeled.

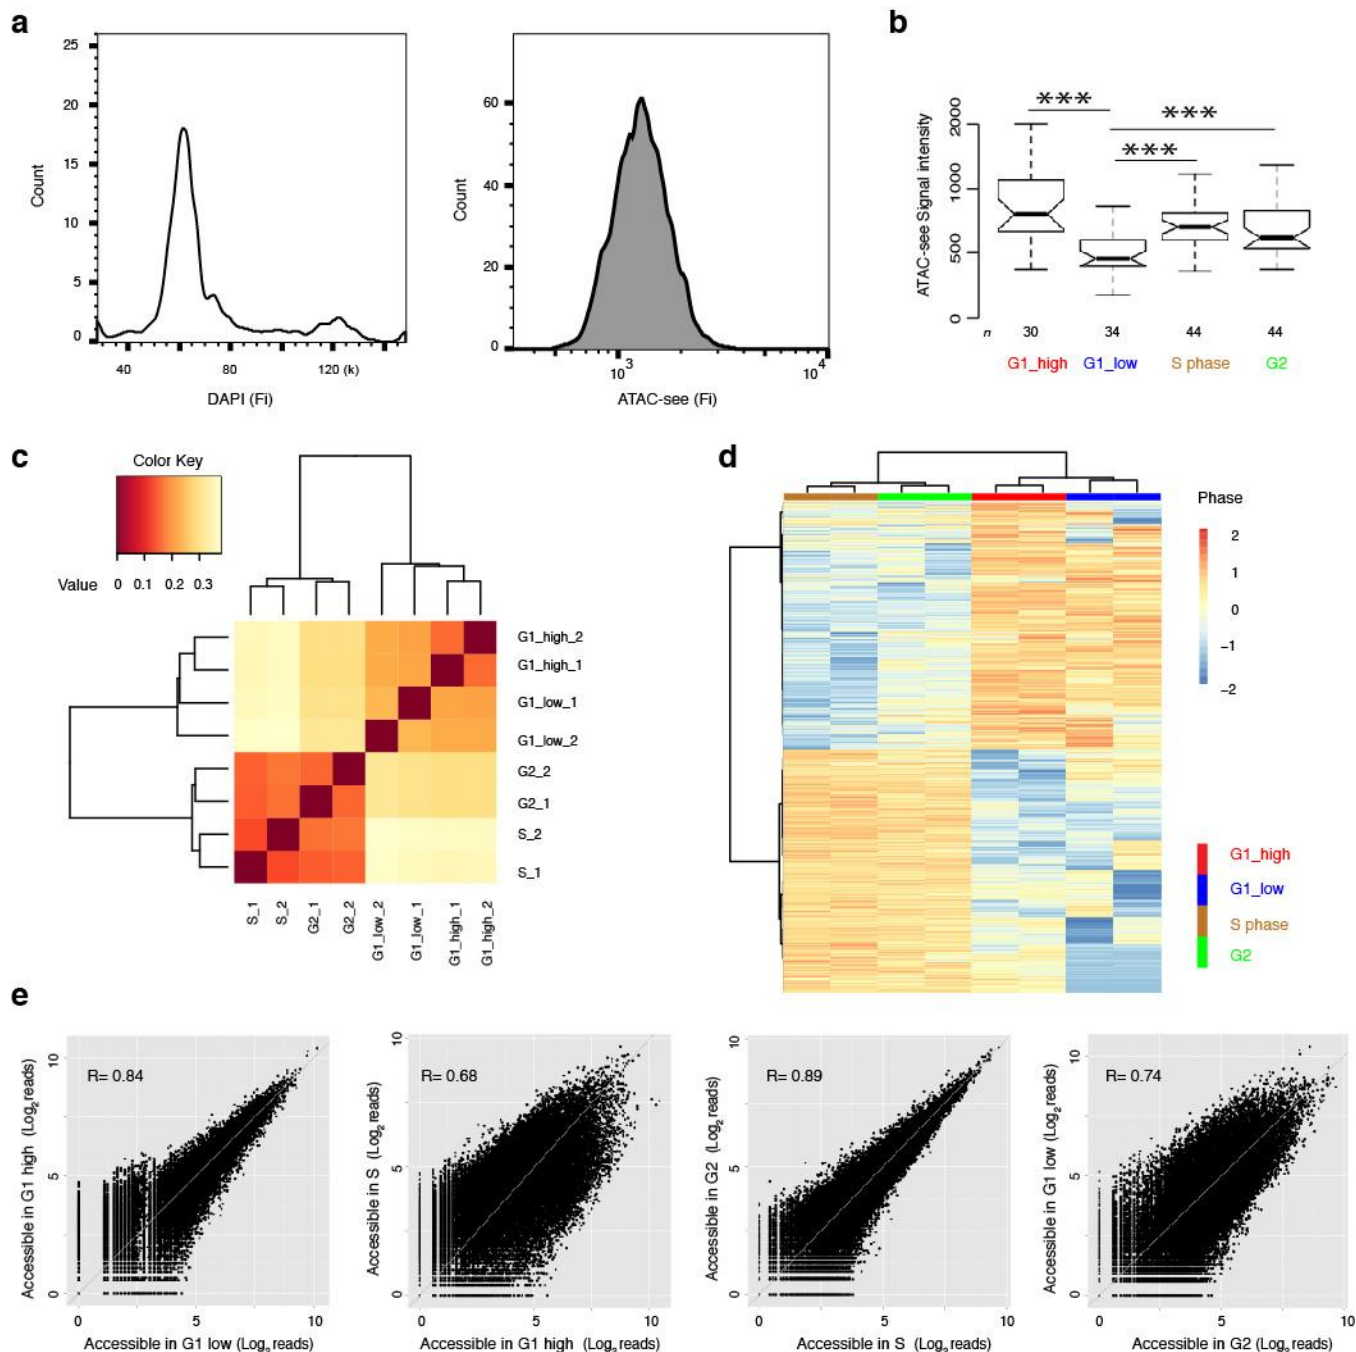

## Supplementary Figure 11

### FACS analysis of ATAC-seq and DAPI dual staining in GM12878 cells.

**a**, Left panel: cell cycle histogram from DAPI staining. Right panel: ATAC-seq signal intensity histogram. **b**, violin plots show the ATAC-seq signal intensity of the sorted cells measured by confocal microscopy.  $n$  = cell number measured under the confocal microscopy. \*\*\* ( $p < 0.001$ , ANOVA test). **c**, Heatmap of the correlation coefficient of different FACS sorted groups. Each group contains independent replicate. **d**, Heatmap represents the cluster of accessible regions ( $FD > 2$ ,  $FDR < 0.05$ ) in FACS sorted groups: G1 low, G1 high, S phase and G2. Each group contains independent replicate. **e**, genome-wide comparison of accessible regions between different ATAC-seq sorted groups: G1 low vs. G1 high; S vs. G1 high; G2 vs. S; G1 low vs. G2.

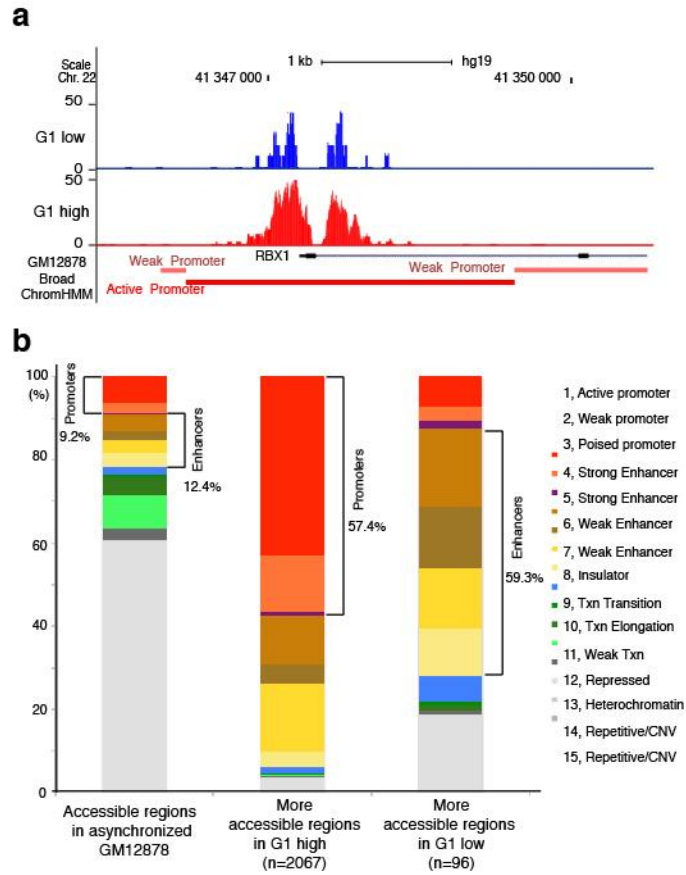

## Supplementary Figure 12

### Classification of accessible regions in G1

**a**, Genomic tracks of ATAC-seq data from ATAC-seq G1 low and G1 high group after FACS sorting. X-axis is genomic coordinates; Y-axis is normalized ATAC-seq read counts. **b**, ChromHMM classification of accessible regions in asynchronous GM12878 cells (left), more accessible G1 high (middle) and more accessible G1 low regions (right). Each chromatin state was color-coded.

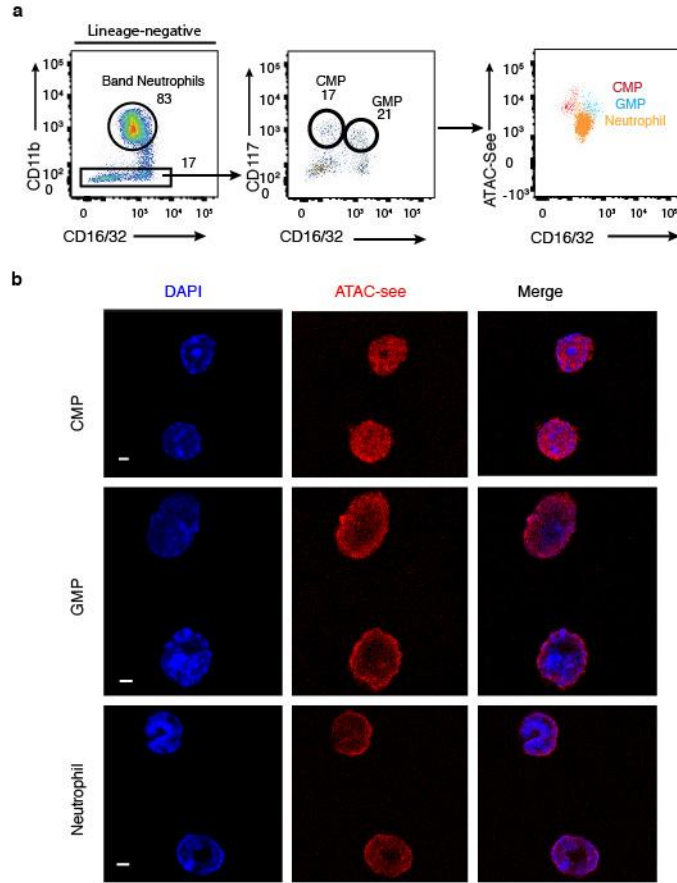

**Supplementary Figure 13**

**FACS analysis of ATAC-see and cell surface marker staining in mouse bone marrow progenitor cells.**

**a:** FACS plots was gated (see Methods) as common myeloid progenitors (CMP), granulocyte-macrophage progenitors (GMP), and band neutrophils; **b:** Representative images of sorted populations shown in (a) by confocal microscopy, and multi images ( $n > 5$ ) were taken with independent replicates in each group.

| <b>Table 1: significant more accessible regions G1 high vs. G1 low</b> |                 |              |              |
|------------------------------------------------------------------------|-----------------|--------------|--------------|
| Peak_location                                                          | logFC           | PValue       | FDR          |
| chr20:26188599-26189488_mergedPeaks.20630_MIR663A_129_LOC2_84801_826   | 1.0282<br>69816 | 9.13E-<br>30 | 3.46E-<br>25 |
| chr9:139685135-139685900_mergedPeaks.38317_LCN15_26552_TME_M141_259    | 1.5743<br>52816 | 1.54E-<br>16 | 1.94E-<br>12 |
| chr22:41346941-41347929_mergedPeaks.21585_RBX1_85_MIR1281_141081       | 1.7489<br>22804 | 4.81E-<br>16 | 4.56E-<br>12 |
| chr19:16770544-16771307_mergedPeaks.16146_MED26_31910_SMI_M7_43        | 2.3634<br>81668 | 2.12E-<br>15 | 1.61E-<br>11 |
| chr16:22201584-22202805_mergedPeaks.12865_VWA3A_98336_EEF2K_15397      | 1.0815<br>21971 | 3.14E-<br>15 | 1.98E-<br>11 |
| chr19:10764416-10765252_mergedPeaks.16015_ILF3-AS1_286_ILF3_102        | 1.6432<br>15777 | 1.03E-<br>12 | 4.89E-<br>09 |
| chr17:43394033-43394959_mergedPeaks.14380_MAP3K14_66_ARHG_AP27_113167  | 1.4794<br>3126  | 3.92E-<br>12 | 1.49E-<br>08 |
| chr7:105924922-105925994_mergedPeaks.34038_SYPL1_172365_NA_MPT_180     | 1.5403<br>92696 | 7.15E-<br>12 | 2.46E-<br>08 |
| chr16:46722531-46723926_mergedPeaks.13044_VPS35_84_ORC6_329            | 1.1873<br>21065 | 8.64E-<br>12 | 2.73E-<br>08 |
| chr19:18391749-18392956_mergedPeaks.16190_KIAA1683_7033_JUN_D_114      | 1.2446<br>87111 | 4.02E-<br>11 | 1.17E-<br>07 |
| chr15:72409848-72411036_mergedPeaks.12110_MYO9A_2_GRAMD2_79694         | 1.4917<br>53705 | 4.32E-<br>11 | 1.17E-<br>07 |
| chr13:115046652-115047631_mergedPeaks.10461_UPF3A_83_CHAMP1_32823      | 1.5171<br>74588 | 5.07E-<br>11 | 1.28E-<br>07 |
| chr17:62971301-62972250_mergedPeaks.14607_AMZ2P1_72_GNA13_80117        | 1.6360<br>44515 | 6.01E-<br>11 | 1.43E-<br>07 |
| chr19:15236004-15236880_mergedPeaks.16119_SYDE1_18229_ILVBL_168        | 1.6909<br>51518 | 1.23E-<br>10 | 2.60E-<br>07 |
| chr19:8454664-8455937_mergedPeaks.15975_RAB11B_96_RAB11B-              | 1.3628<br>23772 | 1.79E-<br>10 | 3.40E-<br>07 |

|                                                                          |             |          |          |
|--------------------------------------------------------------------------|-------------|----------|----------|
| AS1_275                                                                  |             |          |          |
| chr5:179050181-179051047_mergedPeaks.29844_LOC101928445_19872_HNRNPH1_97 | 2.261009189 | 3.06E-10 | 5.28E-07 |
| chr17:80055849-80056916_mergedPeaks.14881_FASN_276_CCDC57_114307         | 1.241356845 | 4.24E-10 | 7.00E-07 |
| chr9:95857593-95858715_mergedPeaks.37712_SUSD3_37185_C9orf89_295         | 1.148327207 | 6.30E-10 | 9.56E-07 |
| chr19:4471487-4472353_mergedPeaks.15910_UBXN6_16625_HDGF_RP2_334         | 1.072635336 | 1.23E-09 | 1.80E-06 |
| chr1:10092590-10093370_mergedPeaks.130_RBP7_35726_UBE4B_60               | 1.486261948 | 1.32E-09 | 1.81E-06 |
| chr17:62502154-62503189_mergedPeaks.14600_DDX5_187_CEP95_486             | 1.468353393 | 1.33E-09 | 1.81E-06 |
| chr3:49058605-49059631_mergedPeaks.22485_NDUFAF3_501_IMP_H2_7757         | 1.225283207 | 2.11E-09 | 2.67E-06 |
| chr16:89574510-89575182_mergedPeaks.13842_SPG7_51_RPL13_52218            | 2.81570218  | 2.30E-09 | 2.82E-06 |
| chr19:2096094-2097076_mergedPeaks.15854_MOB3A_316_IZUMO4_282             | 1.274320549 | 3.65E-09 | 4.07E-06 |
| chr19:54974808-54976102_mergedPeaks.16713_LENG9_561_CDC42EP5_8982        | 1.489682258 | 4.38E-09 | 4.71E-06 |
| chr19:17580341-17581380_mergedPeaks.16163_NXNL1_9135_SLC27A1_439         | 1.393582122 | 4.47E-09 | 4.71E-06 |
| chr3:23987060-23988069_mergedPeaks.22131_NR1D2_814_LINC00691_157174      | 1.146234301 | 4.79E-09 | 4.78E-06 |
| chr11:694964-696008_mergedPeaks.5478_DRD4_58182_TMEM80_104               | 1.065384492 | 5.33E-09 | 5.06E-06 |
| chr11:65382620-65383351_mergedPeaks.6366_MAP3K11_1265_PC_NXL3_797        | 1.304743544 | 7.11E-09 | 6.58E-06 |
| chr22:50963872-50964738_mergedPeaks.21682_NCAPH2_17661_SCO               | 2.084412832 | 8.20E-09 | 7.03E-06 |

|                                                                           |                 |              |              |
|---------------------------------------------------------------------------|-----------------|--------------|--------------|
| 2_563                                                                     |                 |              |              |
| chr19:4867516-4868151_mergedPeaks.15917_PLIN3_53_ARRDC5_35046             | 2.1284<br>48374 | 8.20E-<br>09 | 7.03E-<br>06 |
| chr9:96928088-96929342_mergedPeaks.37723_PTPDC1_135640_MIRLET7A1_9523     | 1.0403<br>0697  | 8.33E-<br>09 | 7.03E-<br>06 |
| chr9:115095112-115096407_mergedPeaks.37988_SUSD1_158182_PTBP3_185         | 1.1937<br>99966 | 9.38E-<br>09 | 7.58E-<br>06 |
| chr19:14247260-14248128_mergedPeaks.16106_ASF1B_254_LOC100507373_269      | 1.0694<br>62193 | 9.70E-<br>09 | 7.67E-<br>06 |
| chr2:114361039-114362053_mergedPeaks.18259_DDX11L2_2393_RPL23AP7_23169    | 1.1174<br>03604 | 1.03E-<br>08 | 7.95E-<br>06 |
| chr14:67707709-67708604_mergedPeaks.11086_MPP5_145_ATP6V1D_118564         | 1.7128<br>41482 | 1.12E-<br>08 | 8.48E-<br>06 |
| chr17:74733073-74734183_mergedPeaks.14805_MFSD11_46_LOC101928514_61497    | 1.2866<br>97033 | 1.24E-<br>08 | 9.21E-<br>06 |
| chr9:139980952-139981744_mergedPeaks.38330_MAN1B1-AS1_79_MAN1B1_30        | 1.5252<br>62384 | 1.45E-<br>08 | 1.06E-<br>05 |
| chr17:44270125-44271591_mergedPeaks.14388_KANSL1_586_KANSL1-AS1_80        | 1.3377<br>69749 | 1.68E-<br>08 | 1.18E-<br>05 |
| chr1:174968319-174969377_mergedPeaks.2251_CACYBP_278_MRPS14_23743         | 1.0405<br>39286 | 1.68E-<br>08 | 1.18E-<br>05 |
| chr8:124428426-124429302_mergedPeaks.36506_ATAD2_20159_WDYHV1_100         | 1.0193<br>45472 | 2.40E-<br>08 | 1.57E-<br>05 |
| chr16:31470482-31471478_mergedPeaks.13023_ARMC5_664_TGFB1I1_12495         | 1.1775<br>88593 | 3.02E-<br>08 | 1.91E-<br>05 |
| chr2:197241886-197242622_mergedPeaks.19515_AC020571.3_117507_HECW2_215081 | 3.1398<br>91973 | 3.19E-<br>08 | 1.98E-<br>05 |
| chr20:39656956-39657639_mergedPeaks.20753_MAFB_339417_TOP1_164            | 1.5725<br>97025 | 3.23E-<br>08 | 1.98E-<br>05 |
| chr7:100026208-100027605_mergedPeaks.33936_ZCWPW1_475_MEP                 | 1.2961<br>11508 | 4.12E-<br>08 | 2.45E-<br>05 |



|                                                                          |                 |              |              |
|--------------------------------------------------------------------------|-----------------|--------------|--------------|
| CE_347                                                                   |                 |              |              |
| chr19:59084107-59085106_mergedPeaks.16793_AC016629.8_14054_MZF1_336      | 1.0485<br>58379 | 4.18E-<br>08 | 2.45E-<br>05 |
| chr16:89307098-89307813_mergedPeaks.13827_ZNF778_23345_AC137932.6_80085  | 3.1820<br>74842 | 4.20E-<br>08 | 2.45E-<br>05 |
| chr19:56110302-56111332_mergedPeaks.16729_ZNF579_18606_FIZ1_76           | 1.2992<br>93298 | 4.38E-<br>08 | 2.52E-<br>05 |
| chr17:43225474-43226442_mergedPeaks.14374_HEXIM1_1275_HEXIM2_12305       | 1.0960<br>28164 | 4.45E-<br>08 | 2.52E-<br>05 |
| chr16:28835047-28835905_mergedPeaks.12940_ATXN2L_1108_MIR4721_19852      | 1.7554<br>5777  | 5.34E-<br>08 | 2.94E-<br>05 |
| chr22:41487314-41488142_mergedPeaks.21586_RBX1_140378_MIR1281_788        | 1.4103<br>20353 | 5.53E-<br>08 | 3.00E-<br>05 |
| chr16:53164257-53165092_mergedPeaks.13158_CHD9_75730_LOC643802_240367    | 1.0721<br>33    | 5.92E-<br>08 | 3.16E-<br>05 |
| chr14:58894056-58894823_mergedPeaks.10950_TIMM9_207_KIAA0586_270         | 3.1537<br>02927 | 7.05E-<br>08 | 3.72E-<br>05 |
| chr14:77494784-77495387_mergedPeaks.11215_IRF2BPL_43_RP11-7F17.5_12306   | 2.0838<br>54905 | 7.75E-<br>08 | 4.03E-<br>05 |
| chr19:44037243-44037780_mergedPeaks.16483_ZNF575_172_XRCC1_42219         | 2.3542<br>98902 | 7.87E-<br>08 | 4.03E-<br>05 |
| chr22:46431467-46432130_mergedPeaks.21645_LOC730668_29303_LINC00899_8950 | 1.4883<br>73171 | 8.36E-<br>08 | 4.23E-<br>05 |
| chr19:44100062-44100772_mergedPeaks.16486_IRGQ_130_ZNF576_320            | 1.8188<br>92089 | 8.81E-<br>08 | 4.34E-<br>05 |
| chr16:88518982-88519861_mergedPeaks.13797_ZNF469_25543_ZFP M1_592        | 1.2089<br>78191 | 9.30E-<br>08 | 4.52E-<br>05 |
| chr19:19516122-19516755_mergedPeaks.16218_GATAD2A_19797_TS SK6_110031    | 1.8119<br>02626 | 1.15E-<br>07 | 5.54E-<br>05 |
| chr4:83205973-83206615_mergedPeaks.25661_RASGEF1B_813233_                | 2.1902<br>53849 | 1.19E-<br>07 | 5.63E-<br>05 |

|                                                                           |                 |              |                 |
|---------------------------------------------------------------------------|-----------------|--------------|-----------------|
| HNRNPD_88855                                                              |                 |              |                 |
| chr16:84651329-84652035_mergedPeaks.13709_TLDC1_113394_COTL1_20           | 2.0128<br>46955 | 1.36E-<br>07 | 6.31E-<br>05    |
| chr22:24950954-24952063_mergedPeaks.21424_UPB1_60258_SNRPD3_109           | 1.2958<br>84231 | 1.51E-<br>07 | 6.91E-<br>05    |
| chr19:18747028-18747934_mergedPeaks.16206_TMEN59L_23800_KLHL26_356        | 1.3592<br>54674 | 1.70E-<br>07 | 7.67E-<br>05    |
| chr19:11545868-11546587_mergedPeaks.16034_PRKCSH_150_ELAVL3_45576         | 1.1376<br>99145 | 1.73E-<br>07 | 7.72E-<br>05    |
| chr19:45250526-45250976_mergedPeaks.16508_CEACAM16_48331_BCL3_1226        | 3.0991<br>1598  | 1.93E-<br>07 | 8.48E-<br>05    |
| chr12:113658665-113659429_mergedPeaks.9075_IQCD_148_TPCN1_212             | 1.0403<br>31285 | 1.94E-<br>07 | 8.48E-<br>05    |
| chr7:104652854-104653787_mergedPeaks.34014_LINC01004_21708_KMT2E-AS1_1268 | 1.0460<br>52352 | 2.00E-<br>07 | 8.60E-<br>05    |
| chr19:42746599-42747525_mergedPeaks.16466_GSK3A_326_ERF_12247             | 1.2241<br>25702 | 2.06E-<br>07 | 8.78E-<br>05    |
| chr3:49044544-49045576_mergedPeaks.22484_WDR6_424_DALRD3_10981            | 1.7561<br>7062  | 2.12E-<br>07 | 8.94E-<br>05    |
| chr19:9929561-9930452_mergedPeaks.15988_FBXL12_275_UBL5_8549              | 1.0764<br>6344  | 2.28E-<br>07 | 9.51E-<br>05    |
| chr20:47662605-47663541_mergedPeaks.20843_CSE1L_291_STAU1_141831          | 1.7345<br>68443 | 2.64E-<br>07 | 0.0001<br>06766 |
| chr6:31794977-31795838_mergedPeaks.30474_HSPA1A_12117_HSPA1B_104          | 1.1383<br>34805 | 2.69E-<br>07 | 0.0001<br>07478 |
| chr3:49130982-49132087_mergedPeaks.22487_QRICH1_30_MIR6890_5813           | 1.5449<br>72567 | 2.93E-<br>07 | 0.0001<br>13592 |
| chr19:41256287-41257250_mergedPeaks.16440_SNRPA_10_MIA_24513              | 1.1181<br>07858 | 3.01E-<br>07 | 0.0001<br>14982 |
| chr17:65821314-65822240_mergedPeaks.14653_SNORA38B_84992_B                | 1.9078<br>76854 | 3.09E-<br>07 | 0.0001<br>14982 |

|                                                                         |                 |              |                 |
|-------------------------------------------------------------------------|-----------------|--------------|-----------------|
| PTF_2                                                                   |                 |              |                 |
| chr12:123849219-123850512_mergedPeaks.9207_MIR8072_475_SETD8_18838      | 1.3302<br>61645 | 3.09E-<br>07 | 0.0001<br>14982 |
| chr19:8273833-8274695_mergedPeaks.15970_CERS4_48_CD320_98976            | 2.0171<br>80826 | 3.12E-<br>07 | 0.0001<br>14982 |
| chr10:12084690-12085584_mergedPeaks.3809_PROSER2-AS1_148428_UPF2_32     | 1.6237<br>36437 | 3.39E-<br>07 | 0.0001<br>22663 |
| chr17:61850700-61851673_mergedPeaks.14590_CCDC47_98_DDX42_362           | 1.2378<br>08356 | 3.86E-<br>07 | 0.0001<br>37356 |
| chr6:148345-149031_mergedPeaks.29884_LINC00266-3_529_DUSP22_143368      | 1.2475<br>10855 | 3.87E-<br>07 | 0.0001<br>37356 |
| chr19:2475826-2476840_mergedPeaks.15863_GADD45B_211_GNG7_226413         | 1.1933<br>31086 | 4.03E-<br>07 | 0.0001<br>4156  |
| chr19:41903114-41903688_mergedPeaks.16450_EXOSC5_145_BCKDH A_292        | 2.3276<br>20368 | 4.40E-<br>07 | 0.0001<br>53166 |
| chr17:72868955-72869792_mergedPeaks.14754_FDXR_217_FADS6_20332          | 1.2147<br>89509 | 4.44E-<br>07 | 0.0001<br>53166 |
| chr11:66383767-66384686_mergedPeaks.6403_RBM14_174_RBM4_21861           | 1.5020<br>97469 | 4.95E-<br>07 | 0.0001<br>67537 |
| chr16:28935951-28937058_mergedPeaks.12946_ATP2A1_45141_RAB EP2_28       | 1.1312<br>4103  | 5.00E-<br>07 | 0.0001<br>68048 |
| chr19:53836711-53837197_mergedPeaks.16695_BIRC8_42079_ZNF845_47         | 3.7231<br>26063 | 5.37E-<br>07 | 0.0001<br>77145 |
| chr18:12883726-12884590_mergedPeaks.15032_RP11-973H7.4_134737_PTPN2_176 | 1.1076<br>76893 | 5.57E-<br>07 | 0.0001<br>80519 |
| chr1:173991144-173991858_mergedPeaks.2235_RC3H1_29291_GPR52_425710      | 1.9755<br>12601 | 6.22E-<br>07 | 0.0001<br>9995  |
| chr17:38296194-38297006_mergedPeaks.14290_CASC3_94_MIR6866_21585        | 2.0403<br>62657 | 6.33E-<br>07 | 0.0002<br>01993 |
| chr3:160116813-160117640_mergedPeaks.24031_SMC4_135_IFT80_9             | 1.6050<br>10617 | 6.74E-<br>07 | 0.0002<br>11414 |

|                                                                          |             |          |             |
|--------------------------------------------------------------------------|-------------|----------|-------------|
| 4                                                                        |             |          |             |
| chr11:33933969-33934629_mergedPeaks.5984_LMO2_20463_CAPRIN1_138930       | 7.417803161 | 7.50E-07 | 0.000231248 |
| chr20:49347438-49348217_mergedPeaks.20874_FAM65C_94372_PARD6B_253        | 1.195002669 | 7.83E-07 | 0.000239713 |
| chr12:131356016-131356886_mergedPeaks.9287_STX2_32632_RAN_165            | 1.267497181 | 8.11E-07 | 0.00024631  |
| chr20:55043297-55043913_mergedPeaks.20940_CASS4_56292_RTFC1_35           | 2.130556346 | 8.31E-07 | 0.000250394 |
| chr4:1685815-1686445_mergedPeaks.24709_FAM53A_412_SLBP_27900             | 1.654645196 | 8.42E-07 | 0.000250394 |
| chr3:51533303-51534473_mergedPeaks.22527_RBM15B_105190_VPRBP_130         | 1.020401673 | 8.45E-07 | 0.000250394 |
| chr1:173445844-173446602_mergedPeaks.2228_TNFSF4_269752_LOC100506023_71  | 1.647440961 | 8.75E-07 | 0.000257296 |
| chr22:42228543-42229341_mergedPeaks.21604_CCDC134_32265_SREBF2_140       | 1.229489628 | 8.85E-07 | 0.000258259 |
| chr19:13953145-13953896_mergedPeaks.16093_MIR23A_6047_MIR181C_31992      | 1.967138729 | 9.11E-07 | 0.000262676 |
| chr16:11836243-11837133_mergedPeaks.12761_TXNDC11_40_ZC3H7A_54426        | 1.217560557 | 9.14E-07 | 0.000262676 |
| chr22:39548401-39549047_mergedPeaks.21564_CBX7_186_PDGF8_8190            | 1.89016083  | 9.32E-07 | 0.000266034 |
| chr17:29876602-29877202_mergedPeaks.14200_MIR4724_15002_MIR193A_10112    | 3.012732536 | 9.57E-07 | 0.000270991 |
| chr3:112280420-112281468_mergedPeaks.23299_SLC35A5_88_LOC100506621_39872 | 1.227537374 | 1.02E-06 | 0.00028618  |
| chr19:50143279-50143952_mergedPeaks.16630_RRAS_215_SCAF1_1766            | 1.743539253 | 1.04E-06 | 0.000289443 |
| chr6:34216669-34217310_mergedPeaks.30531_C6orf1_104_NUDT3_               | 1.617540169 | 1.10E-06 | 0.00030156  |

|                                                                            |                 |              |                 |
|----------------------------------------------------------------------------|-----------------|--------------|-----------------|
| 143468                                                                     |                 |              |                 |
| chr1:25942705-25943454_mergedPeaks.302_LDLRAP1_73004_MAN1C1_879            | 1.8467<br>2706  | 1.11E-<br>06 | 0.0003<br>0156  |
| chr5:176738820-176739626_mergedPeaks.29807_PRELID1_8461_MXD3_69            | 1.4298<br>78118 | 1.11E-<br>06 | 0.0003<br>0156  |
| chr17:20946093-20947075_mergedPeaks.14118_USP22_232_HP0894_2_32284         | 1.1060<br>31533 | 1.12E-<br>06 | 0.0003<br>0156  |
| chr11:62572403-62573235_mergedPeaks.6291_MIR6514_12576_NXF1_145            | 1.3744<br>75844 | 1.12E-<br>06 | 0.0003<br>0156  |
| chr17:45726601-45727534_mergedPeaks.14401_NPEPPS_118624_KP_NB1_1494        | 1.0161<br>16383 | 1.17E-<br>06 | 0.0003<br>13099 |
| chr11:568288-568941_mergedPeaks.5475_MIR210HG_157_LOC143666_7271           | 1.9748<br>17773 | 1.22E-<br>06 | 0.0003<br>22612 |
| chr19:11071240-11072078_mergedPeaks.16023_C19orf52_32236_SMARCA4_23168     | 1.3515<br>01456 | 1.30E-<br>06 | 0.0003<br>43283 |
| chr15:72523293-72523947_mergedPeaks.12114_PKM_1557_PARP6_40008             | 1.5349<br>62979 | 1.35E-<br>06 | 0.0003<br>51736 |
| chr17:47439060-47440013_mergedPeaks.14430_MIR6129_73720_RP11-1079K10.3_207 | 1.4592<br>77326 | 1.38E-<br>06 | 0.0003<br>55288 |
| chr20:2082730-2083637_mergedPeaks.20301_STK35_656_LOC388780_104390         | 2.1442<br>43682 | 1.39E-<br>06 | 0.0003<br>55289 |
| chr17:76182938-76183677_mergedPeaks.14827_TK1_22_AFMID_90                  | 1.5289<br>15773 | 1.43E-<br>06 | 0.0003<br>63579 |
| chr12:53894325-53895432_mergedPeaks.8109_MAP3K12_1434_TARBP2_498           | 1.1538<br>99508 | 1.46E-<br>06 | 0.0003<br>6646  |
| chr5:109024768-109025805_mergedPeaks.28644_MAN2A1_220_LOC100289673_193596  | 1.1638<br>17508 | 1.53E-<br>06 | 0.0003<br>80808 |
| chr16:1020784-1021303_mergedPeaks.12575_LOC101929387_50011_LMF1_10275      | 3.3789<br>84922 | 1.55E-<br>06 | 0.0003<br>84877 |
| chr19:4791188-4791916_mergedPeaks.15914_MIR7-3_20871_FEM1A_175             | 1.1048<br>1935  | 1.56E-<br>06 | 0.0003<br>84877 |

|                                                                                   |                 |              |                 |
|-----------------------------------------------------------------------------------|-----------------|--------------|-----------------|
| chr5:137800255-<br>137801425_mergedPeaks.29134_REEP2_26151_EGR<br>1_340           | 1.0055<br>43644 | 1.69E-<br>06 | 0.0004<br>12569 |
| chr16:67514807-<br>67515461_mergedPeaks.13356_ATP6V0D1_45_AGRP<br>_2582           | 1.7699<br>93465 | 1.73E-<br>06 | 0.0004<br>19628 |
| chr10:54577750-<br>54578283_mergedPeaks.4317_MBL2_46556_PCDH15<br>_1983035        | 3.7086<br>43572 | 1.90E-<br>06 | 0.0004<br>50417 |
| chr14:81936428-<br>81937107_mergedPeaks.11264_RP11-<br>299L17.3_20266_SEL1L_63438 | 2.8281<br>75427 | 1.98E-<br>06 | 0.0004<br>66682 |
| chr17:7210159-<br>7211133_mergedPeaks.13969_YBX2_12770_EIF5A_2<br>09              | 1.1425<br>15871 | 2.16E-<br>06 | 0.0005<br>02624 |
| chr16:2723191-<br>2723864_mergedPeaks.12619_ERVK13-<br>1_87_KCTD5_8967            | 1.2174<br>30081 | 2.34E-<br>06 | 0.0005<br>37077 |
| chr11:119076432-<br>119077222_mergedPeaks.7120_CCDC153_10243_CB<br>L_158          | 1.5727<br>78575 | 2.37E-<br>06 | 0.0005<br>38553 |
| chr19:40324033-<br>40325020_mergedPeaks.16416_MIR6719_4084_DYR<br>K1B_315         | 1.2104<br>61727 | 2.37E-<br>06 | 0.0005<br>38553 |
| chr10:103590213-<br>103590916_mergedPeaks.5030_KCNIP2-<br>AS1_11740_KCNIP2_13113  | 1.6834<br>19069 | 2.51E-<br>06 | 0.0005<br>6643  |
| chr1:149857989-<br>149858863_mergedPeaks.1730_HIST2H2BE_194_HIS<br>T2H2AC_98      | 1.1673<br>34059 | 2.52E-<br>06 | 0.0005<br>6643  |
| chr20:39945770-<br>39946652_mergedPeaks.20762_ZHX3_17472_LPIN3_<br>23348          | 1.4205<br>37735 | 2.56E-<br>06 | 0.0005<br>71251 |
| chrX:48814995-<br>48815971_mergedPeaks.38897_OTUD5_590_KCND1_<br>12768            | 1.1720<br>33876 | 2.57E-<br>06 | 0.0005<br>71251 |
| chr1:39456441-<br>39457159_mergedPeaks.491_RHBDL2_49344_AKIRI<br>N1_115           | 1.8478<br>68978 | 2.78E-<br>06 | 0.0006<br>10438 |
| chr3:10157039-<br>10157730_mergedPeaks.21872_BRK1_52_VHL_2593<br>4                | 1.7342<br>98203 | 2.79E-<br>06 | 0.0006<br>10438 |
| chr1:219394225-<br>219394784_mergedPeaks.3016_LYPLAL1_47313_RN<br>U5F-1_652114    | 3.1820<br>03734 | 2.80E-<br>06 | 0.0006<br>10438 |

|                                                                                    |                     |              |                 |
|------------------------------------------------------------------------------------|---------------------|--------------|-----------------|
| chr9:139010217-<br>139010961_mergedPeaks.38304_C9orf69_312_LHX3_86366              | 1.5638<br>37412     | 3.02E-<br>06 | 0.0006<br>54595 |
| chr6:132833624-<br>132834500_mergedPeaks.31926_MOXD1_111398_STX7_275               | 1.5946<br>83428     | 3.05E-<br>06 | 0.0006<br>57362 |
| chr17:7517983-<br>7518776_mergedPeaks.13981_FXR2_164_SAT2_12815                    | 1.0731<br>70861     | 3.17E-<br>06 | 0.0006<br>78705 |
| chr19:38826775-<br>38827801_mergedPeaks.16382_CATSPERG_846_PSM D8_37901            | 1.0351<br>90803     | 3.23E-<br>06 | 0.0006<br>89044 |
| chr12:82986852-<br>82987418_mergedPeaks.8556_METTL25_234860_T MTC2_93798           | 7.3051<br>96768     | 3.26E-<br>06 | 0.0006<br>90361 |
| chr7:32930746-<br>32932009_mergedPeaks.33126_LINC00997_133480_KBTBD2_91            | 1.0825<br>31682     | 3.31E-<br>06 | 0.0006<br>94732 |
| chr4:7104975-<br>7105417_mergedPeaks.24781_FLJ36777_93_SORCS2_89177                | 7.5979<br>35406     | 3.31E-<br>06 | 0.0006<br>94732 |
| chr1:31190844-31191713_mergedPeaks.379_RP11-111I12.1_680819_MATN1-AS1_340          | 1.0304<br>25455     | 3.37E-<br>06 | 0.0007<br>03007 |
| chr19:40854101-<br>40854794_mergedPeaks.16424_C19orf47_13_MIR6796_21305            | 1.4475<br>07818     | 3.54E-<br>06 | 0.0007<br>33269 |
| chr3:156892409-<br>156893254_mergedPeaks.23986_CCNL1_14349_PTX3_261748             | 1.3825<br>74116     | 3.61E-<br>06 | 0.0007<br>44002 |
| chr19:1248600-<br>1249932_mergedPeaks.15821_MIDN_715_CIRBP_20000                   | 1.0744<br>94136     | 3.64E-<br>06 | 0.0007<br>46084 |
| chr4:180051209-<br>180051786_mergedPeaks.27148_LINC01099_1222407_LINC00290_2028805 | -<br>2.0714<br>8179 | 3.66E-<br>06 | 0.0007<br>46084 |
| chr10:45454793-<br>45455335_mergedPeaks.4225_TMEM72_48301_TME M72-AS1_73           | 2.1624<br>25393     | 3.68E-<br>06 | 0.0007<br>46885 |
| chr12:69201403-<br>69202171_mergedPeaks.8351_LOC100130075_2513_MDM2_164            | 1.2515<br>90899     | 3.75E-<br>06 | 0.0007<br>56352 |
| chr9:35115789-<br>35116550_mergedPeaks.37322_FAM214B_276_UNC13B_45819              | 1.6786<br>00528     | 3.83E-<br>06 | 0.0007<br>69823 |
| chr16:2042025-                                                                     | 2.3621              | 3.86E-       | 0.0007          |

|                                                                               |                 |              |                 |
|-------------------------------------------------------------------------------|-----------------|--------------|-----------------|
| 2042599_mergedPeaks.12598_SYNGR3_2367_ZNF598_17510                            | 46175           | 06           | 70847           |
| chr19:2151375-2152068_mergedPeaks.15855_AP3D1_165_DOT1L_12426                 | 1.4140<br>39693 | 4.17E-<br>06 | 0.0008<br>23261 |
| chr13:41634810-41636331_mergedPeaks.9597_ELF1_79152_WBP4_126                  | 1.0494<br>36482 | 4.30E-<br>06 | 0.0008<br>46232 |
| chr20:62496196-62496735_mergedPeaks.21013_ABHD16B_3900_TP<br>D52L2_115        | 2.1283<br>89502 | 4.35E-<br>06 | 0.0008<br>47209 |
| chr6:167369950-167371089_mergedPeaks.32565_RNASET2_442_MIR<br>3939_40881      | 1.6683<br>02384 | 4.35E-<br>06 | 0.0008<br>47209 |
| chr1:29507855-29508834_mergedPeaks.376_TMEM200B_57923_SR<br>SF4_293           | 1.3831<br>81233 | 4.54E-<br>06 | 0.0008<br>71419 |
| chr20:305814-306270_mergedPeaks.20277_RP5-<br>1103G7.4_146_SOX12_172          | 2.1736<br>89827 | 4.59E-<br>06 | 0.0008<br>71419 |
| chr19:56165061-56166521_mergedPeaks.16733_U2AF2_376_EPN1_2<br>0769            | 1.1021<br>08908 | 4.59E-<br>06 | 0.0008<br>71419 |
| chr13:24153002-24153876_mergedPeaks.9374_LINC00327_109789_T<br>NFRSF19_59     | 1.7574<br>78873 | 4.67E-<br>06 | 0.0008<br>71419 |
| chr19:50528409-50529251_mergedPeaks.16643_VRK3_25_ZNF473_3<br>81              | 1.2143<br>75968 | 4.67E-<br>06 | 0.0008<br>71419 |
| chr17:47269836-47270590_mergedPeaks.14427_B4GALNT2_59885_G<br>NGT2_16549      | 1.1903<br>88217 | 4.68E-<br>06 | 0.0008<br>71419 |
| chr16:18937043-18938187_mergedPeaks.12832_ARL6IP1_124758_S<br>MG1_111         | 1.0613<br>4988  | 4.86E-<br>06 | 0.0008<br>99804 |
| chr19:5622621-5623258_mergedPeaks.15922_SAFB2_1_SAFB_106                      | 1.6726<br>76449 | 4.92E-<br>06 | 0.0009<br>06717 |
| chr5:179049671-179050016_mergedPeaks.29843_LOC101928445_19<br>101_HNRNPH1_868 | 3.5077<br>20058 | 5.04E-<br>06 | 0.0009<br>23678 |
| chr6:30684895-30685624_mergedPeaks.30441_NRM_26353_MDC1_<br>199               | 1.2258<br>85443 | 5.08E-<br>06 | 0.0009<br>26694 |
| chr22:39715324-39716040_mergedPeaks.21566_RPL3_12_SYNGR1_3<br>0271            | 1.4713<br>54348 | 5.17E-<br>06 | 0.0009<br>33994 |



|                                                                               |                      |              |                 |
|-------------------------------------------------------------------------------|----------------------|--------------|-----------------|
| chr17:57969965-<br>57970790_mergedPeaks.14556_TUBD1_71_RPS6KB1_29             | 1.6036<br>20414      | 5.48E-<br>06 | 0.0009<br>80475 |
| chr3:5019098-<br>5019527_mergedPeaks.21783_BHLHE40-<br>AS1_71126_BHLHE40_1784 | 2.0788<br>85996      | 5.54E-<br>06 | 0.0009<br>87499 |
| chr11:64645723-<br>64646556_mergedPeaks.6333_CDC42BPG_34098_EH<br>D1_101      | 1.0493<br>94082      | 5.63E-<br>06 | 0.0009<br>95801 |
| chr14:54955228-<br>54955985_mergedPeaks.10892_CNIH1_47458_GMFB_138            | 2.8885<br>81414      | 5.64E-<br>06 | 0.0009<br>95801 |
| chr14:64970273-<br>64971073_mergedPeaks.11055_ZBTB25_119_ZBTB1_618            | 1.4692<br>91735      | 5.70E-<br>06 | 0.0010<br>01333 |
| chr14:35342713-<br>35343520_mergedPeaks.10677_CFL2_159355_BAZ1<br>A_1737      | 2.1478<br>62432      | 5.73E-<br>06 | 0.0010<br>01333 |
| chr1:240739544-<br>240739914_mergedPeaks.3433_FMN2_484545_GRE<br>M2_35733     | -<br>6.6998<br>02982 | 6.17E-<br>06 | 0.0010<br>66786 |
| chr11:66886234-<br>66886869_mergedPeaks.6409_RHOD_62263_KDM2A_120954          | 1.2502<br>00398      | 6.21E-<br>06 | 0.0010<br>66786 |
| chr15:44719148-<br>44719947_mergedPeaks.11793_CASC4_138639_CTD<br>SPL2_31     | 1.9017<br>4092       | 6.45E-<br>06 | 0.0010<br>87885 |
| chr16:89767934-<br>89768755_mergedPeaks.13849_SPATA2L_223_VPS9<br>D1-AS1_9919 | 1.2036<br>08575      | 6.46E-<br>06 | 0.0010<br>87885 |
| chr9:140024067-<br>140024394_mergedPeaks.38333_DPP7_15035_GRIN<br>1_9378      | 3.5350<br>54714      | 6.48E-<br>06 | 0.0010<br>87885 |
| chr16:691675-<br>692019_mergedPeaks.12564_C16orf13_5481_FAM19<br>5A_1         | 7.6827<br>15875      | 6.48E-<br>06 | 0.0010<br>87885 |
| chr19:1905016-<br>1905750_mergedPeaks.15847_SCAMP4_11_CSNK1G2_35777           | 1.4926<br>77594      | 6.57E-<br>06 | 0.0010<br>96444 |
| chr22:42486575-<br>42487255_mergedPeaks.21611_NDUFA6_27_NDUFA<br>6-AS1_21     | 1.6497<br>25503      | 6.59E-<br>06 | 0.0010<br>96444 |
| chr1:169680421-<br>169681037_mergedPeaks.2145_SELP_81352_SELL_1<br>14         | 7.1763<br>45478      | 6.94E-<br>06 | 0.0011<br>49539 |

|                                                                                     |                 |              |                 |
|-------------------------------------------------------------------------------------|-----------------|--------------|-----------------|
| chr15:80215870-<br>80216531_mergedPeaks.12220_ST20_536_BCL2A1_4<br>7443             | 1.5432<br>49867 | 7.24E-<br>06 | 0.0011<br>83952 |
| chr3:50336586-<br>50337256_mergedPeaks.22513_HYAL3_22_HYAL1_4<br>111                | 1.2025<br>80486 | 7.34E-<br>06 | 0.0011<br>94931 |
| chr7:134855281-<br>134856730_mergedPeaks.34480_C7orf49_427_MIR6<br>509_35825        | 1.1271<br>499   | 7.72E-<br>06 | 0.0012<br>52246 |
| chr17:46125238-<br>46126219_mergedPeaks.14413_NFE2L1_43_CBX1_52<br>832              | 1.0741<br>42644 | 7.76E-<br>06 | 0.0012<br>52666 |
| chr21:30396733-<br>30397553_mergedPeaks.21134_USP16_206_CCT8_48<br>975              | 1.1794<br>87022 | 8.03E-<br>06 | 0.0012<br>83207 |
| chr17:79319623-<br>79320288_mergedPeaks.14859_TMEM105_15481_R<br>P11-1055B8.3_39205 | 1.8454<br>82585 | 8.05E-<br>06 | 0.0012<br>83207 |
| chr1:212781549-<br>212782562_mergedPeaks.2911_ATF3_43380_FAM71<br>A_15733           | 1.4244<br>50581 | 8.21E-<br>06 | 0.0012<br>98467 |
| chr16:28223025-<br>28223662_mergedPeaks.12935_XPO6_104_SBK1_80<br>496               | 1.6775<br>22223 | 8.38E-<br>06 | 0.0013<br>20092 |
| chr6:114291442-<br>114292795_mergedPeaks.31604_FLJ34503_66568_H<br>DAC2_241         | 1.6173<br>9898  | 8.52E-<br>06 | 0.0013<br>31371 |
| chr19:30302168-<br>30302989_mergedPeaks.16263_C19orf12_96615_CC<br>NE1_322          | 1.0958<br>59393 | 8.54E-<br>06 | 0.0013<br>31371 |
| chr3:144148491-<br>144148944_mergedPeaks.23763_C3orf58_456551_P<br>LOD2_1730565     | 7.3235<br>59613 | 8.57E-<br>06 | 0.0013<br>31371 |
| chr2:32390561-<br>32391181_mergedPeaks.17206_SPAST_102192_SLC3<br>0A6_38            | 2.5225<br>19488 | 8.78E-<br>06 | 0.0013<br>54324 |
| chr19:19887044-<br>19887721_mergedPeaks.16229_LINC00663_160_ZNF<br>506_45178        | 1.6229<br>34193 | 9.00E-<br>06 | 0.0013<br>75256 |
| chr8:41909429-<br>41910168_mergedPeaks.35274_KAT6A_293_AP3M2_<br>100665             | 1.4127<br>5397  | 9.04E-<br>06 | 0.0013<br>75256 |
| chr7:74267150-<br>74267578_mergedPeaks.33533_NCF1_79056_GTF2I<br>RD2_508            | 2.9069<br>90087 | 9.04E-<br>06 | 0.0013<br>75256 |

|                                                                                |                 |              |                 |
|--------------------------------------------------------------------------------|-----------------|--------------|-----------------|
| chr19:42724080-<br>42724554_mergedPeaks.16465_DEDD2_2373_ZNF526_174            | 2.5740<br>91864 | 9.06E-<br>06 | 0.0013<br>75256 |
| chr11:805149-<br>805491_mergedPeaks.5484_PIDD_70_RPLP2_4615                    | 2.7119<br>76735 | 9.10E-<br>06 | 0.0013<br>754   |
| chr9:5493598-<br>5494470_mergedPeaks.36979_CD274_43532_PDCD1LG2_16510          | 2.6411<br>28868 | 9.38E-<br>06 | 0.0014<br>11798 |
| chr2:214016153-<br>214017022_mergedPeaks.19771_IKZF2_254_AC079610.2_132342     | 1.2162<br>30754 | 9.93E-<br>06 | 0.0014<br>89664 |
| chr20:37590590-<br>37591428_mergedPeaks.20735_DHX35_29_RP4-70501.1_262382      | 1.3398<br>4413  | 1.00E-<br>05 | 0.0014<br>94245 |
| chr6:149969463-<br>149970165_mergedPeaks.32260_RPS18P9_55063_KATNA1_126        | 1.7581<br>74108 | 1.01E-<br>05 | 0.0014<br>97681 |
| chr1:45265391-<br>45266250_mergedPeaks.576_BEST4_12394_PLK3_215                | 1.1196<br>82474 | 1.01E-<br>05 | 0.0014<br>97898 |
| chr1:153606214-<br>153607017_mergedPeaks.1798_CHTOP_158_SNAPIN_24514           | 1.5520<br>00838 | 1.04E-<br>05 | 0.0015<br>20265 |
| chr16:10837520-<br>10838310_mergedPeaks.12723_NUBP1_273_TVP23A_74706           | 1.1319<br>05193 | 1.04E-<br>05 | 0.0015<br>20265 |
| chr17:27916507-<br>27916921_mergedPeaks.14184_GIT1_104_ANKRD13B_3812           | 3.7344<br>10369 | 1.10E-<br>05 | 0.0015<br>96    |
| chr16:402504-<br>403299_mergedPeaks.12555_AXIN1_225_MRPL28_17668               | 1.0010<br>30808 | 1.11E-<br>05 | 0.0016<br>001   |
| chr20:49411292-<br>49411958_mergedPeaks.20875_BCAS4_195_ADNP_114703            | 1.7297<br>16301 | 1.20E-<br>05 | 0.0017<br>19381 |
| chr1:235106892-<br>235107986_mergedPeaks.3344_LINC01132_247651_SNORA14B_183813 | 2.3520<br>01916 | 1.21E-<br>05 | 0.0017<br>26323 |
| chr4:74401727-<br>74402341_mergedPeaks.25524_RP11-622A1.2_27515_RASSF6_84253   | 7.0289<br>67236 | 1.22E-<br>05 | 0.0017<br>39975 |
| chr19:344549-<br>344980_mergedPeaks.15795_PPAP2C_53329_MIER2_27                | 3.6046<br>42111 | 1.24E-<br>05 | 0.0017<br>55707 |
| chr19:680285-                                                                  | 1.1238          | 1.28E-       | 0.0017          |

|                                                                             |                      |              |                 |
|-----------------------------------------------------------------------------|----------------------|--------------|-----------------|
| 681193_mergedPeaks.15804_FSTL3_4351_PRSS57_14722                            | 23354                | 05           | 92636           |
| chr3:101567904-101568930_mergedPeaks.23107_NFKBIZ_21584_LO C152225_91285    | 1.2379<br>78409      | 1.29E-<br>05 | 0.0018<br>06926 |
| chr12:6960446-6961930_mergedPeaks.7438_CDCA3_732_USP5_102                   | 1.0020<br>16859      | 1.34E-<br>05 | 0.0018<br>66348 |
| chr10:109488448-109488831_mergedPeaks.5121_SORCS1_564173_RN U6-53P_1441775  | -<br>6.6799<br>17007 | 1.35E-<br>05 | 0.0018<br>77954 |
| chr21:38738383-38739259_mergedPeaks.21254_DSCR3_98988_DYRK 1A_52385         | 1.2867<br>4939       | 1.37E-<br>05 | 0.0019<br>00851 |
| chr19:1260697-1261240_mergedPeaks.15823_MIDN_12417_CIRBP_8 298              | 1.3638<br>9513       | 1.38E-<br>05 | 0.0019<br>08995 |
| chr8:55014083-55014800_mergedPeaks.35393_TCEA1_79425_LYPL A1_136            | 1.2129<br>99492      | 1.44E-<br>05 | 0.0019<br>62574 |
| chr19:51897274-51897927_mergedPeaks.16664_C19orf84_3772_LOC 100129083_21559 | 1.8237<br>66781      | 1.44E-<br>05 | 0.0019<br>62574 |
| chr19:47164259-47164953_mergedPeaks.16566_DACT3_211_MIR320 E_47996          | 1.1272<br>38673      | 1.45E-<br>05 | 0.0019<br>77336 |
| chr3:49449207-49450035_mergedPeaks.22493_RHOA_95_TCTA_17                    | 1.2385<br>74775      | 1.49E-<br>05 | 0.0020<br>17558 |
| chr18:11980750-11981580_mergedPeaks.15023_MPPE1_72369_IMPA 2_261            | 1.4626<br>82752      | 1.51E-<br>05 | 0.0020<br>29586 |
| chr17:27229774-27230374_mergedPeaks.14176_FLOT2_5359_DHRS1 3_15             | 1.8350<br>20119      | 1.51E-<br>05 | 0.0020<br>29586 |
| chr1:28879197-28879843_mergedPeaks.365_RCC1_34776_TRNAU1A P_8               | 1.7427<br>41509      | 1.54E-<br>05 | 0.0020<br>48348 |
| chr8:42150138-42151049_mergedPeaks.35284_IKBKB_21774_POLB_ 45379            | 1.2904<br>51205      | 1.54E-<br>05 | 0.0020<br>48348 |
| chr5:56110851-56111525_mergedPeaks.27874_MAP3K1_289_SETD9 _93898            | 1.3152<br>43656      | 1.55E-<br>05 | 0.0020<br>50523 |
| chr22:45097656-45098280_mergedPeaks.21639_LINC00229_76669_P RR5_109         | 2.1938<br>32573      | 1.56E-<br>05 | 0.0020<br>59305 |

|                                                                                 |                 |              |                 |
|---------------------------------------------------------------------------------|-----------------|--------------|-----------------|
| chr17:259630-<br>260254_mergedPeaks.13864_RPH3AL_57309_C17orf<br>97_175         | 1.6706<br>2691  | 1.60E-<br>05 | 0.0020<br>97609 |
| chr17:57183968-<br>57184606_mergedPeaks.14545_TRIM37_21_MIR454<br>_30946        | 1.3712<br>934   | 1.61E-<br>05 | 0.0021<br>0156  |
| chr6:44187085-<br>44187497_mergedPeaks.30656_CAPN11_60744_SLC<br>29A1_4071      | 7.4588<br>8204  | 1.67E-<br>05 | 0.0021<br>83241 |
| chr17:79935153-<br>79935919_mergedPeaks.14877_ASPSCR1_111_STRA<br>13_45249      | 1.3746<br>35449 | 1.69E-<br>05 | 0.0021<br>96133 |
| chr16:2033783-<br>2034300_mergedPeaks.12596_NOXO1_2491_GFER_1<br>08             | 2.2626<br>22351 | 1.70E-<br>05 | 0.0022<br>00164 |
| chr18:812111-<br>812820_mergedPeaks.14912_YES1_138_ADCYAP1_9<br>2478            | 1.6515<br>90702 | 1.74E-<br>05 | 0.0022<br>34956 |
| chr16:71842285-<br>71843473_mergedPeaks.13468_SNORD71_50489_AP<br>1G1_97        | 1.2902<br>67594 | 1.78E-<br>05 | 0.0022<br>69345 |
| chr21:34960793-<br>34961353_mergedPeaks.21207_DONSON_59_CRYZL1<br>_53087        | 3.5360<br>38377 | 1.78E-<br>05 | 0.0022<br>69345 |
| chr12:17010132-<br>17010857_mergedPeaks.7640_LMO3_249346_SKP1P<br>2_131186      | 2.7917<br>33346 | 1.79E-<br>05 | 0.0022<br>76686 |
| chr12:121904945-<br>121905624_mergedPeaks.9173_MIR7107_23129_KD<br>M2B_113080   | 1.2411<br>59013 | 1.80E-<br>05 | 0.0022<br>76686 |
| chr17:29814680-<br>29815268_mergedPeaks.14198_RAB11FIP4_96333_<br>MIR4724_46926 | 1.4996<br>71016 | 1.82E-<br>05 | 0.0022<br>95972 |
| chr6:44094941-<br>44095528_mergedPeaks.30654_MRPL14_43_TM6<br>3B_141            | 1.8082<br>38809 | 1.84E-<br>05 | 0.0022<br>98174 |
| chr22:50945953-<br>50946824_mergedPeaks.21681_LMF2_253_NCAPH2_<br>256           | 1.2623<br>96799 | 1.86E-<br>05 | 0.0023<br>12376 |
| chr17:4613422-<br>4614164_mergedPeaks.13931_ARRB2_5_MED11_209<br>29             | 1.1644<br>24733 | 1.91E-<br>05 | 0.0023<br>55295 |
| chr11:9594565-<br>9595453_mergedPeaks.5632_ZNF143_112498_WEE1<br>_218           | 1.0843<br>55949 | 1.97E-<br>05 | 0.0024<br>1136  |

|                                                                                    |                 |              |                 |
|------------------------------------------------------------------------------------|-----------------|--------------|-----------------|
| chr9:132404214-<br>132404854_mergedPeaks.38243_ASB6_86_PRRX2_2<br>3385             | 1.4653<br>74788 | 1.98E-<br>05 | 0.0024<br>12327 |
| chr16:88636423-<br>88637136_mergedPeaks.13799_MIR5189_101454_Z<br>C3H18_9          | 1.4796<br>23194 | 2.01E-<br>05 | 0.0024<br>43506 |
| chr13:42845594-<br>42846430_mergedPeaks.9608_DGKH_231841_AKAP<br>11_276            | 1.2409<br>22127 | 2.03E-<br>05 | 0.0024<br>60395 |
| chr11:67120712-<br>67121571_mergedPeaks.6414_POLD4_74_CLCF1_205<br>07              | 1.0188<br>9071  | 2.04E-<br>05 | 0.0024<br>60395 |
| chr10:105127599-<br>105128675_mergedPeaks.5062_TAF5_414_MIR1307_<br>26021          | 2.1306<br>31365 | 2.07E-<br>05 | 0.0024<br>92486 |
| chr8:62692730-<br>62693339_mergedPeaks.35532_MIR4470_65688_NK<br>AIN3_468466       | 7.0644<br>0196  | 2.09E-<br>05 | 0.0025<br>0718  |
| chr12:80687224-<br>80687922_mergedPeaks.8517_OTOGL_84341_PTPRQ<br>_150552          | 7.0425<br>97428 | 2.33E-<br>05 | 0.0027<br>76607 |
| chr1:32816658-<br>32817345_mergedPeaks.408_MARCKSL1_15161_FA<br>M229A_10843        | 1.9291<br>22507 | 2.38E-<br>05 | 0.0028<br>25001 |
| chr19:41304508-<br>41305280_mergedPeaks.16444_RAB4B-<br>EGLN2_20771_EGLN2_439      | 1.0886<br>94936 | 2.38E-<br>05 | 0.0028<br>25001 |
| chr13:46038710-<br>46039476_mergedPeaks.9645_COG3_64_ERICH6B_1<br>50781            | 1.8136<br>50106 | 2.45E-<br>05 | 0.0028<br>93594 |
| chr8:87354417-<br>87355336_mergedPeaks.35922_SLC7A13_112272_W<br>WP1_117           | 1.1690<br>30547 | 2.46E-<br>05 | 0.0028<br>99909 |
| chr11:46142730-<br>46143572_mergedPeaks.6116_PHF21A_166_CREB3L<br>1_156037         | 1.6866<br>51546 | 2.51E-<br>05 | 0.0029<br>51617 |
| chr9:37402647-<br>37403384_mergedPeaks.37366_ZCCHC7_282421_GR<br>HPR_19691         | 2.3371<br>85619 | 2.58E-<br>05 | 0.0030<br>26305 |
| chr9:131037913-<br>131038676_mergedPeaks.38215_GOLGA2_26_SWI5_<br>130              | 1.1349<br>03148 | 2.62E-<br>05 | 0.0030<br>6357  |
| chr1:144533549-<br>144534746_mergedPeaks.1673_RP11-<br>640M9.1_192392_PFN1P2_78580 | 1.3613<br>27478 | 2.68E-<br>05 | 0.0031<br>12521 |

|                                                                      |             |          |             |
|----------------------------------------------------------------------|-------------|----------|-------------|
| chr19:796882-798019_mergedPeaks.15805_PTBP1_59_MIR4745_7489          | 1.068940797 | 2.69E-05 | 0.003112521 |
| chr17:2295864-2296414_mergedPeaks.13894_SGSM2_55334_MNT_8119         | 1.469546128 | 2.69E-05 | 0.003112521 |
| chr19:4638992-4639676_mergedPeaks.15911_SEMA6B_79563_TNF_AIP8L1_192  | 1.243303901 | 2.70E-05 | 0.003114571 |
| chr2:113992959-113993309_mergedPeaks.18254_PAX8-AS1_31_PAX8_43364    | 6.974245918 | 2.75E-05 | 0.00315471  |
| chr16:75589741-75590493_mergedPeaks.13561_CHST5_21049_TME_M231_67    | 1.986871635 | 2.77E-05 | 0.003168514 |
| chr17:46985511-46986200_mergedPeaks.14425_UBE2Z_125_SNF8_36299       | 1.620948865 | 2.86E-05 | 0.003263301 |
| chr7:6120780-6121458_mergedPeaks.32713	EIF2AK1_22259_USP42_23430     | 1.2483014   | 2.89E-05 | 0.003270326 |
| chr9:20621982-20622886_mergedPeaks.37138_MIR4474_120094_MLLT3_108    | 1.520573306 | 2.90E-05 | 0.003275366 |
| chr6:34204164-34205128_mergedPeaks.30530_HMGA1_70_MIR6835_3803       | 1.442899963 | 2.96E-05 | 0.003332661 |
| chr4:100768474-100768926_mergedPeaks.25924_DAPP1_30720_LAMTOR3_47003 | 1.953138368 | 2.98E-05 | 0.003339504 |
| chr9:35603921-35604565_mergedPeaks.37324_FAM166B_40347_TESK1_1037    | 1.155493131 | 2.99E-05 | 0.003339504 |
| chr11:62623153-62623784_mergedPeaks.6294_SNHG1_108_SLC3A2_15         | 1.441001719 | 2.99E-05 | 0.003339504 |
| chr1:165847072-165847651_mergedPeaks.2069_UCK2_50630_MIR3658_29796   | 3.331586111 | 3.02E-05 | 0.003357369 |
| chr9:6412662-6413381_mergedPeaks.37005_TPD52L3_84673_UHRF2_129       | 1.150517145 | 3.04E-05 | 0.00336208  |
| chr19:58891929-58892837_mergedPeaks.16777_ZNF497_18169_ZNF837_6      | 1.112076479 | 3.04E-05 | 0.00336208  |

|                                                                                 |                      |              |                 |
|---------------------------------------------------------------------------------|----------------------|--------------|-----------------|
| chr1:208108366-<br>208108939_mergedPeaks.2818_CD34_23969_PLXNA<br>2_309013      | -<br>1.3746<br>39685 | 3.05E-<br>05 | 0.0033<br>6208  |
| chr20:34542060-<br>34542728_mergedPeaks.20695_PHF20_182472_SCA<br>ND1_887       | 1.2644<br>95535      | 3.07E-<br>05 | 0.0033<br>77046 |
| chr20:25677040-<br>25677823_mergedPeaks.20625_ZNF337_9856_FAM1<br>82B_99447     | 1.2242<br>42908      | 3.09E-<br>05 | 0.0033<br>87546 |
| chr19:7402343-<br>7402989_mergedPeaks.15955_INSR_108655_ARHGE<br>F18_101907     | 1.9712<br>00498      | 3.11E-<br>05 | 0.0033<br>9796  |
| chr20:18568311-<br>18568933_mergedPeaks.20551_DTD1_67_RP11-<br>379J5.5_110730   | 1.5922<br>22597      | 3.12E-<br>05 | 0.0033<br>99508 |
| chr19:4246896-<br>4247706_mergedPeaks.15903_CCDC94_191_SHD_31<br>296            | 1.4145<br>85364      | 3.15E-<br>05 | 0.0034<br>085   |
| chr1:109756262-<br>109757038_mergedPeaks.1492_SARS_136_CELSR2_3<br>5990         | 2.1210<br>57271      | 3.16E-<br>05 | 0.0034<br>085   |
| chr2:185317199-<br>185318091_mergedPeaks.19284_NUP35_1328563_Z<br>NF804A_145447 | 6.8541<br>45485      | 3.16E-<br>05 | 0.0034<br>085   |
| chr20:3748286-<br>3748875_mergedPeaks.20319_C20orf27_128_SPEF1_<br>13522        | 1.2512<br>94164      | 3.18E-<br>05 | 0.0034<br>085   |
| chrX:70503013-<br>70503641_mergedPeaks.39052_NONO_286_ITGB1BP<br>2_18300        | 3.3708<br>11576      | 3.18E-<br>05 | 0.0034<br>085   |
| chr10:28623774-<br>28624450_mergedPeaks.4067_MIR8086_45833_WAC<br>-AS1_197171   | 4.0254<br>19475      | 3.27E-<br>05 | 0.0035<br>00504 |
| chr17:21030056-<br>21030587_mergedPeaks.14122_DHRS7B_81_TMEM1<br>1_87587        | 2.2850<br>62981      | 3.30E-<br>05 | 0.0035<br>17511 |
| chr15:64673455-<br>64673911_mergedPeaks.12011_CSNK1G1_25241_KI<br>AA0101_26     | 3.0819<br>58539      | 3.35E-<br>05 | 0.0035<br>65689 |
| chr5:95297013-<br>95298123_mergedPeaks.28437_C5orf27_109633_EL<br>L2_207        | 1.0069<br>36614      | 3.38E-<br>05 | 0.0035<br>8066  |
| chr21:46707633-<br>46708117_mergedPeaks.21330_POFUT2_64_LOC642<br>852_91        | 2.1125<br>25877      | 3.48E-<br>05 | 0.0036<br>73141 |



|                                                                              |                      |              |                 |
|------------------------------------------------------------------------------|----------------------|--------------|-----------------|
| chr16:87929224-<br>87929641_mergedPeaks.13788_SLC7A5_26332_CA5<br>A_40680    | 7.2939<br>0428       | 3.54E-<br>05 | 0.0036<br>90035 |
| chr3:197024674-<br>197025295_mergedPeaks.24665_MIR4797_4165_DL<br>G1-AS1_133 | 1.7628<br>22052      | 3.54E-<br>05 | 0.0036<br>90035 |
| chr12:81096729-<br>81097407_mergedPeaks.8522_PTPRQ_258943_MYF6<br>_4339      | 6.9200<br>96933      | 3.56E-<br>05 | 0.0036<br>96108 |
| chr11:60928451-<br>60929365_mergedPeaks.6258_CD5_58979_VPS37C_8              | 1.1161<br>48643      | 3.61E-<br>05 | 0.0037<br>39241 |
| chr4:155537907-<br>155538193_mergedPeaks.26767_FGG_4148_LRAT_1<br>27112      | -<br>6.5307<br>25111 | 3.63E-<br>05 | 0.0037<br>56004 |
| chr2:71295200-<br>71296082_mergedPeaks.17780_NAGK_234_MCEE_61<br>753         | 1.2673<br>20637      | 3.66E-<br>05 | 0.0037<br>75017 |
| chr9:131314363-<br>131315345_mergedPeaks.38222_SPTAN1_18_WDR3<br>4_104275    | 1.1612<br>35539      | 3.67E-<br>05 | 0.0037<br>76527 |
| chr18:3247144-<br>3247952_mergedPeaks.14929_MYL12A_21_MYL12B_<br>14562       | 1.2240<br>50267      | 3.68E-<br>05 | 0.0037<br>76527 |
| chr1:178994702-<br>178995719_mergedPeaks.2321_FAM20B_137_TOR3<br>A_55901     | 1.1770<br>50886      | 3.72E-<br>05 | 0.0038<br>07058 |
| chr19:47353848-<br>47354414_mergedPeaks.16568_SNAR-<br>E_20170_AP2S1_72      | 2.6908<br>21087      | 3.86E-<br>05 | 0.0039<br>24927 |
| chr18:3012938-<br>3013635_mergedPeaks.14925_LPIN2_1341_MYOM1_<br>206820      | 1.2863<br>44907      | 3.88E-<br>05 | 0.0039<br>25461 |
| chr7:45039119-<br>45039909_mergedPeaks.33302_CCM2_170_NACAD_8<br>8979        | 1.1693<br>10105      | 3.88E-<br>05 | 0.0039<br>25461 |
| chr10:76969912-<br>76970736_mergedPeaks.4644_VDAC2_25_COMTD1_<br>25446       | 1.6007<br>05875      | 3.93E-<br>05 | 0.0039<br>53839 |
| chr1:109505627-<br>109506338_mergedPeaks.1484_CLCC1_12912_WDR4<br>7_78868    | 2.2410<br>86927      | 4.00E-<br>05 | 0.0039<br>98622 |
| chr20:55129846-<br>55130258_mergedPeaks.20941_FAM209B_21751_TF<br>AP2C_74305 | -<br>6.5299<br>11057 | 4.07E-<br>05 | 0.0040<br>56417 |
| chr12:124068795-                                                             | 2.3827               | 4.12E-       | 0.0040          |

|                                                                         |             |          |             |
|-------------------------------------------------------------------------|-------------|----------|-------------|
| 124069381_mergedPeaks.9213_TMED2_13_DDX55_17583                         | 92546       | 05       | 91771       |
| chr22:39928577-39929142_mergedPeaks.21571_ATF4_12291_RPS19BP1_1         | 1.713341571 | 4.13E-05 | 0.004091771 |
| chr1:53018277-53019299_mergedPeaks.657_ZCCHC11_26_GPX7_49254            | 1.688604263 | 4.22E-05 | 0.004168016 |
| chr11:46368672-46369195_mergedPeaks.6119_DGKZ_14479_MIR4688_29018       | 1.566162618 | 4.26E-05 | 0.00419428  |
| chr5:123985183-123986208_mergedPeaks.28893_CSNK1G3_1137903_ZNF608_95110 | 1.31556898  | 4.31E-05 | 0.004229695 |
| chr1:1310456-1311111_mergedPeaks.17_AURKAIP1_203_CCNL2_23935            | 1.43370508  | 4.32E-05 | 0.004229695 |
| chr8:28479699-28480441_mergedPeaks.35116_MIR4288_117371_EXTL3_78919     | 1.090995587 | 4.33E-05 | 0.004229695 |
| chr6:33601335-33601721_mergedPeaks.30524_ITPR3_12373_UQCC2_78000        | 3.554862947 | 4.38E-05 | 0.004261076 |
| chr12:53614501-53615040_mergedPeaks.8099_ITGB7_13679_RARG_11270         | 1.699044403 | 4.39E-05 | 0.004261076 |
| chr21:47743686-47744695_mergedPeaks.21337_PCNT_155_DIP2A_134671         | 1.028325419 | 4.42E-05 | 0.004261076 |
| chr9:127962565-127963049_mergedPeaks.38163_PPP6C_10589_RABEPK_54        | 2.851801413 | 4.42E-05 | 0.004261076 |
| chr3:81810066-81811160_mergedPeaks.22901_LOC101927374_2349737_GBE1_337  | 1.085942147 | 4.42E-05 | 0.004261076 |
| chr16:23846770-23847447_mergedPeaks.12886_CHP2_81161_PRKCB_191          | 2.396142593 | 4.45E-05 | 0.004267253 |
| chr15:42782752-42783366_mergedPeaks.11769_ZNF106_33294_SNAIP23_4444     | 3.505540805 | 4.45E-05 | 0.004267253 |
| chr5:138739393-138740005_mergedPeaks.29149_PROB1_8814_SPATA24_77        | 1.349502582 | 4.48E-05 | 0.004274042 |
| chr6:44224772-                                                          | 1.4967      | 4.48E-   | 0.0042      |

|                                                                        |                 |              |                 |
|------------------------------------------------------------------------|-----------------|--------------|-----------------|
| 44225563_mergedPeaks.30661_MIR4647_3145_SLC35B2_141                    | 20948           | 05           | 74042           |
| chr1:36614906-36615515_mergedPeaks.451_TRAPPC3_95_MAP7D1_6355          | 1.2177<br>71531 | 4.52E-<br>05 | 0.0042<br>76745 |
| chr19:16435232-16436113_mergedPeaks.16134_KLF2_22_EPS15L1_147151       | 1.1902<br>01095 | 4.52E-<br>05 | 0.0042<br>76745 |
| chr15:65185782-65186621_mergedPeaks.12026_PLEKH02_52120_ANKDD1A_17899  | 1.2883<br>21266 | 4.53E-<br>05 | 0.0042<br>76745 |
| chr1:17222386-17223339_mergedPeaks.209_MST1L_131887_CROCC_25582        | 1.1638<br>0578  | 4.53E-<br>05 | 0.0042<br>76745 |
| chr21:18984955-18985469_mergedPeaks.21066_CXADR_99989_BTG3_56          | 1.8064<br>4924  | 4.56E-<br>05 | 0.0042<br>95497 |
| chrX:135055764-135056391_mergedPeaks.39598_SAGE1_80293_MMGT1_57        | 3.2864<br>44154 | 4.65E-<br>05 | 0.0043<br>59291 |
| chr19:48111836-48112491_mergedPeaks.16586_GLTSCR1_711_EHD2_104437      | 1.6535<br>53682 | 4.65E-<br>05 | 0.0043<br>59291 |
| chr22:37595154-37595763_mergedPeaks.21521_C1QTNF6_11128_SSTR3_11547    | 1.3095<br>31843 | 4.67E-<br>05 | 0.0043<br>61108 |
| chr18:10525757-10526508_mergedPeaks.15004_NAPG_260_RP11-856M7.1_135797 | 1.9665<br>39714 | 4.73E-<br>05 | 0.0043<br>93538 |
| chr18:29598220-29598943_mergedPeaks.15187_RNF125_137_RNF138_73987      | 2.1842<br>193   | 4.74E-<br>05 | 0.0043<br>93538 |
| chr19:55770221-55770947_mergedPeaks.16719_PPP6R1_546_HSPBP1_21167      | 1.5797<br>30064 | 4.78E-<br>05 | 0.0044<br>20792 |
| chr18:29671754-29672864_mergedPeaks.15189_RNF125_73865_RNF138_259      | 1.0240<br>566   | 4.85E-<br>05 | 0.0044<br>82013 |
| chr14:59950554-59951581_mergedPeaks.10972_GPR135_19008_L3HYPDH_6       | 1.3187<br>80907 | 4.88E-<br>05 | 0.0044<br>94486 |
| chr9:123555393-123555939_mergedPeaks.38091_MEGF9_78901_FBXW2_74        | 2.2073<br>59997 | 4.95E-<br>05 | 0.0045<br>50284 |
| chr6:32939392-                                                         | 1.1197          | 5.01E-       | 0.0045          |

|                                                                            |                      |              |                 |
|----------------------------------------------------------------------------|----------------------|--------------|-----------------|
| 32940324_mergedPeaks.30504_BRD2_1194_HLA-DOA_37531                         | 14642                | 05           | 8113            |
| chr2:172778630-172779325_mergedPeaks.19088_HAT1_43_METAP1D_85826           | 1.9041<br>14765      | 5.02E-<br>05 | 0.0045<br>8113  |
| chr3:53194815-53195361_mergedPeaks.22561_RFT1_30618_PRKCD_134              | 2.2109<br>24603      | 5.02E-<br>05 | 0.0045<br>8113  |
| chr2:64925749-64926320_mergedPeaks.17666_SERTAD2_44988_AC007880.1_164731   | 3.7863<br>74104      | 5.07E-<br>05 | 0.0045<br>99362 |
| chr13:45914977-45915847_mergedPeaks.9641_SNORA31_3668_TPT1_7               | 1.1199<br>43922      | 5.08E-<br>05 | 0.0045<br>99362 |
| chr7:44787864-44788580_mergedPeaks.33295_OGDH_142102_ZMIZ2_307             | 1.0664<br>19033      | 5.10E-<br>05 | 0.0046<br>09475 |
| chr7:141258335-141258796_mergedPeaks.34604_AGK_7488_KIAA1147_143388        | -<br>3.6053<br>40824 | 5.11E-<br>05 | 0.0046<br>10118 |
| chr13:31773947-31774665_mergedPeaks.9467_B3GALTL_195_RXFP2_539372          | 1.4833<br>64681      | 5.23E-<br>05 | 0.0047<br>00146 |
| chr1:216179190-216179860_mergedPeaks.2978_KCTD3_438791_USH2A_417213        | 3.8775<br>38793      | 5.30E-<br>05 | 0.0047<br>5669  |
| chr19:52511215-52511595_mergedPeaks.16673_ZNF350_21326_ZNF615_78           | 7.1003<br>24235      | 5.32E-<br>05 | 0.0047<br>57142 |
| chr10:5454322-5454754_mergedPeaks.3673_TUBAL3_7745_NET1_33975              | 7.0244<br>61713      | 5.38E-<br>05 | 0.0048<br>05494 |
| chr13:45151188-45152008_mergedPeaks.9635_TSC22D1-AS1_1567_LINC00330_232168 | 3.2503<br>83608      | 5.58E-<br>05 | 0.0049<br>69592 |
| chr12:54019605-54020384_mergedPeaks.8110_RP11-793H13.3_112227_ATF7_205     | 1.3309<br>70155      | 5.64E-<br>05 | 0.0050<br>12249 |
| chr12:93835431-93836250_mergedPeaks.8732_NUDT4P1_64095_UBE2N_186           | 1.5778<br>42026      | 5.69E-<br>05 | 0.0050<br>4424  |
| chr6:43138734-43139292_mergedPeaks.30636_SRF_94_CUL9_10908                 | 1.3105<br>63704      | 5.81E-<br>05 | 0.0051<br>39949 |
| chr19:12792010-12792964_mergedPeaks.16063_WDR83OS_12022_D                  | 1.9069<br>99343      | 5.85E-<br>05 | 0.0051<br>49668 |

|                                                                        |                 |              |                 |
|------------------------------------------------------------------------|-----------------|--------------|-----------------|
| HPS_214                                                                |                 |              |                 |
| chr16:67701775-67702173_mergedPeaks.13363_C16orf86_1258_GFO D2_51299   | 6.8515<br>20993 | 5.87E-<br>05 | 0.0051<br>53825 |
| chr19:4342614-4343679_mergedPeaks.15905_STAP2_4299_MPND_377            | 1.0074<br>71557 | 5.90E-<br>05 | 0.0051<br>72244 |
| chr18:9334302-9335091_mergedPeaks.14994_ANKRD12_197946_T WSG1_68       | 1.3115<br>76953 | 5.93E-<br>05 | 0.0051<br>88677 |
| chr1:89356674-89357576_mergedPeaks.1168_RP11-76N22.2_206238_GTF2B_176  | 1.4868<br>58071 | 5.96E-<br>05 | 0.0051<br>9192  |
| chr9:37120026-37120774_mergedPeaks.37351_LOC100506710_40508_ZCCHC7_194 | 1.6950<br>7687  | 5.99E-<br>05 | 0.0051<br>9192  |
| chr17:7154944-7155989_mergedPeaks.13968_ELP5_95_CLDN7_10798            | 1.1223<br>80336 | 5.99E-<br>05 | 0.0051<br>9192  |
| chr5:171614819-171615878_mergedPeaks.29736_STK10_2_EFCAB9_5827         | 1.1255<br>47254 | 6.06E-<br>05 | 0.0052<br>30529 |
| chr4:56411921-56413443_mergedPeaks.25359_TMEM165_150603_CLOCK_394      | 1.2147<br>39229 | 6.07E-<br>05 | 0.0052<br>30529 |
| chr22:41777282-41778267_mergedPeaks.21592_TEF_14438_TOB2_65253         | 1.2402<br>43205 | 6.12E-<br>05 | 0.0052<br>68548 |
| chr5:176797685-176798060_mergedPeaks.29810_RGS14_13029_SLC34A1_13559   | 7.3434<br>35423 | 6.26E-<br>05 | 0.0053<br>60624 |
| chr19:48672836-48674049_mergedPeaks.16588_PLA2G4C_59333_LIG1_418       | 1.4178<br>4161  | 6.27E-<br>05 | 0.0053<br>60624 |
| chr8:6603988-6604313_mergedPeaks.34855_MIR4659B_1389_GS1-24F4.2_88925  | 6.7922<br>2416  | 6.31E-<br>05 | 0.0053<br>70144 |
| chr14:60679067-60679988_mergedPeaks.10982_DHRS7_47316_PPM1A_32942      | 1.7343<br>64414 | 6.36E-<br>05 | 0.0053<br>94299 |
| chr17:56736051-56736789_mergedPeaks.14541_C17orf47_114687_TEX14_32996  | 3.0283<br>15463 | 6.37E-<br>05 | 0.0053<br>94299 |
| chr21:43429852-43430766_mergedPeaks.21281_C2CD2_83510_ZBTB21_187       | 1.6105<br>30394 | 6.43E-<br>05 | 0.0054<br>32486 |

|                                                                                    |                      |              |                 |
|------------------------------------------------------------------------------------|----------------------|--------------|-----------------|
| chr16:57278655-<br>57279408_mergedPeaks.13231_RSPRY1_58791_ARL<br>2BP_6            | 1.2283<br>73196      | 6.46E-<br>05 | 0.0054<br>4355  |
| chr8:137194552-<br>137195250_mergedPeaks.36754_KHDRBS3_725186_<br>FAM135B_2314164  | -<br>1.8068<br>66032 | 6.53E-<br>05 | 0.0054<br>86616 |
| chr16:3493404-<br>3493799_mergedPeaks.12646_ZNF597_111_NAA60_<br>14390             | 4.1096<br>8614       | 6.54E-<br>05 | 0.0054<br>86616 |
| chr16:3930635-<br>3931095_mergedPeaks.12652_CREBBP_744_ADCY9_<br>235321            | 2.1050<br>84789      | 6.55E-<br>05 | 0.0054<br>897   |
| chr2:47142919-<br>47143456_mergedPeaks.17433_MCFD2_180_TTC7A_<br>80                | 2.9385<br>10006      | 6.61E-<br>05 | 0.0055<br>23518 |
| chr22:26879551-<br>26880081_mergedPeaks.21431_ASPHD2_54537_HPS<br>4_13             | 2.4004<br>27627      | 6.91E-<br>05 | 0.0057<br>4718  |
| chr12:113772663-<br>113773171_mergedPeaks.9077_MIR6762_43590_SL<br>C8B1_8          | 2.5694<br>99533      | 6.92E-<br>05 | 0.0057<br>4718  |
| chr12:133463906-<br>133464620_mergedPeaks.9320_CHFR_59_LOC10192<br>8530_164        | 1.4805<br>33338      | 6.94E-<br>05 | 0.0057<br>50752 |
| chr19:46295874-<br>46296451_mergedPeaks.16555_DMWD_102_RSPH6A<br>_22443            | 1.2896<br>36437      | 7.05E-<br>05 | 0.0058<br>12759 |
| chr8:28259171-<br>28260061_mergedPeaks.35113_ZNF395_15639_FBX<br>O16_88219         | 1.1288<br>65898      | 7.12E-<br>05 | 0.0058<br>57695 |
| chr4:128508169-<br>128508518_mergedPeaks.26352_MIR2054_2079930<br>_INTU_45743      | -<br>4.2501<br>04001 | 7.13E-<br>05 | 0.0058<br>57695 |
| chr21:47062825-<br>47063750_mergedPeaks.21333_SLC19A1_108745_A<br>L592528.1_193046 | 1.2164<br>50287      | 7.15E-<br>05 | 0.0058<br>60586 |
| chr7:2442819-<br>2443361_mergedPeaks.32654_EIF3B_48617_CHST12<br>_104              | 1.2394<br>15103      | 7.18E-<br>05 | 0.0058<br>7013  |
| chr3:50374580-<br>50375225_mergedPeaks.22516_RASSF1_7_RASSF1-<br>AS1_39            | 1.1236<br>18532      | 7.32E-<br>05 | 0.0059<br>75452 |
| chr1:9488772-<br>9489316_mergedPeaks.120_SPSB1_136104_LOC100<br>506022_11          | 1.6699<br>6059       | 7.38E-<br>05 | 0.0060<br>0637  |

|                                                                            |             |          |             |
|----------------------------------------------------------------------------|-------------|----------|-------------|
| chr19:18335229-18335720_mergedPeaks.16189_RAB3A_20600_PDE4C_1811           | 1.891087052 | 7.39E-05 | 0.006007848 |
| chr2:198017709-198018175_mergedPeaks.19534_PGAP1_226488_ANKRD44-IT1_149301 | 7.049554758 | 7.66E-05 | 0.006211149 |
| chr19:4400367-4400850_mergedPeaks.15907_SH3GL1_43_CHAF1A_2051              | 1.333815482 | 7.70E-05 | 0.006228959 |
| chr1:176162031-176162559_mergedPeaks.2275_SCARNA3_224619_RFWD2_14085       | 6.851145005 | 7.72E-05 | 0.006231169 |
| chr3:12525588-12526207_mergedPeaks.21900_PPARG_195462_TSEN2_33             | 2.674089391 | 7.76E-05 | 0.006249926 |
| chr16:81514841-81515392_mergedPeaks.13646_MIR4720_96494_CMIP_13837         | 2.263675668 | 7.81E-05 | 0.006276047 |
| chr9:136932974-136933889_mergedPeaks.38295_BRD3_290_WDR5_71482             | 1.174031089 | 7.86E-05 | 0.00629282  |
| chr11:71791362-71792042_mergedPeaks.6457_LRTOMT_326_NUMA1_37               | 1.112864309 | 7.89E-05 | 0.006300928 |
| chr12:50419022-50419674_mergedPeaks.8064_RACGAP1_41_ASIC1_48019            | 1.862372339 | 8.00E-05 | 0.00636355  |
| chr16:29816658-29817465_mergedPeaks.12957_KIF22_15028_MAZ_796              | 1.347154314 | 8.06E-05 | 0.006398162 |
| chr13:21714290-21715105_mergedPeaks.9350_SAP18_45_MRPL57_35674             | 1.441759046 | 8.22E-05 | 0.006440456 |
| chr15:82338323-82338814_mergedPeaks.12250_MEX3B_84_EFTUD1_216536           | 2.235342869 | 8.23E-05 | 0.006440456 |
| chr2:97481607-97482450_mergedPeaks.18047_CNNM3_38_ANKRD23_27730            | 1.123260441 | 8.25E-05 | 0.006440456 |
| chr2:220024861-220025830_mergedPeaks.19891_IHH_100107_NHEJ1_242            | 1.034144221 | 8.36E-05 | 0.006511635 |
| chr16:21512856-21513871_mergedPeaks.12854_LOC100190986_67587_SMG1P3_239    | 1.056740353 | 8.37E-05 | 0.006511635 |

|                                                                              |                 |              |                 |
|------------------------------------------------------------------------------|-----------------|--------------|-----------------|
| chr15:42066163-<br>42066987_mergedPeaks.11764_MIR626_82793_MAP<br>KBP1_56    | 1.1280<br>86542 | 8.53E-<br>05 | 0.0066<br>16361 |
| chr11:60673827-<br>60674343_mergedPeaks.6250_PRPF19_24_TMEM10<br>9_7285      | 1.9400<br>51816 | 8.67E-<br>05 | 0.0067<br>02503 |
| chr6:91120950-<br>91121540_mergedPeaks.31281_MIR4464_98785_MA<br>P3K7_175775 | 7.0187<br>43953 | 8.70E-<br>05 | 0.0067<br>03641 |
| chr19:1268975-<br>1269723_mergedPeaks.15825_CIRBP_83_CIRBP-<br>AS1_910       | 1.0876<br>81634 | 8.72E-<br>05 | 0.0067<br>03641 |
| chr15:55700041-<br>55700867_mergedPeaks.11910_MIR628_35222_CCP<br>G1_254     | 1.5687<br>65561 | 8.73E-<br>05 | 0.0067<br>03641 |
| chr7:49806449-<br>49807012_mergedPeaks.33345_CDC14C_842574_VW<br>C2_6526     | 2.1742<br>33138 | 8.81E-<br>05 | 0.0067<br>56551 |
| chr6:52859939-<br>52860894_mergedPeaks.30777_GSTA4_238_ICK_661<br>84         | 1.0930<br>62388 | 8.83E-<br>05 | 0.0067<br>58562 |
| chr16:78133051-<br>78134153_mergedPeaks.13594_WWOX_276_MAF_15<br>01020       | 1.1630<br>66441 | 8.86E-<br>05 | 0.0067<br>67194 |
| chr10:75503901-<br>75504414_mergedPeaks.4620_SEC24C_27_FUT11_27<br>891       | 2.1925<br>17659 | 9.02E-<br>05 | 0.0068<br>71795 |
| chr19:18058513-<br>18059254_mergedPeaks.16175_CCDC124_15060_KC<br>NN1_3227   | 1.6707<br>17419 | 9.07E-<br>05 | 0.0068<br>99148 |
| chr20:56884309-<br>56885104_mergedPeaks.20953_PPP4R1L_211_RAB2<br>2A_64      | 1.4961<br>16748 | 9.20E-<br>05 | 0.0069<br>8163  |
| chr16:19078682-<br>19079432_mergedPeaks.12834_TMC7_83449_COQ7_<br>181        | 1.2369<br>19029 | 9.24E-<br>05 | 0.0069<br>99955 |
| chr10:104262261-<br>104262774_mergedPeaks.5048_ACTR1A_5_SUFU_12<br>01        | 2.3955<br>52808 | 9.32E-<br>05 | 0.0070<br>08924 |
| chrX:41301421-<br>41301959_mergedPeaks.38792_DDX3X_109040_NYX<br>_5022       | 2.2063<br>37734 | 9.34E-<br>05 | 0.0070<br>08924 |
| chr3:142838134-<br>142838777_mergedPeaks.23731_U2SURP_118084_C<br>HST2_162   | 1.9654<br>12245 | 9.35E-<br>05 | 0.0070<br>08924 |



|                                                                                    |                 |                 |                 |
|------------------------------------------------------------------------------------|-----------------|-----------------|-----------------|
| chr9:140512996-<br>140513833_mergedPeaks.38349_C9orf37_106_EHM<br>T1_29            | 1.4567<br>93102 | 9.36E-<br>05    | 0.0070<br>08924 |
| chr7:17422140-<br>17422813_mergedPeaks.32852_AC019117.1_7936_A<br>C017060.1_176057 | 3.7334<br>96116 | 9.42E-<br>05    | 0.0070<br>33808 |
| chr1:226309208-<br>226309963_mergedPeaks.3167_H3F3AP4_59158_AC<br>BD3_64838        | 1.6017<br>4985  | 9.45E-<br>05    | 0.0070<br>43058 |
| chr19:37019055-<br>37019852_mergedPeaks.16350_ZNF260_205_AC092<br>295.7_44518      | 1.5831<br>80887 | 9.53E-<br>05    | 0.0070<br>72189 |
| chr17:685312-<br>685834_mergedPeaks.13868_GLOD4_2_NXN_81778                        | 3.3025<br>3938  | 9.54E-<br>05    | 0.0070<br>72189 |
| chr19:38864903-<br>38865646_mergedPeaks.16383_PSMD8_85_GGN_133<br>94               | 1.1599<br>61487 | 9.63E-<br>05    | 0.0071<br>15688 |
| chr19:10402911-<br>10403314_mergedPeaks.16003_ICAM5_2458_ZGLP1_<br>17121           | 3.4430<br>22561 | 9.68E-<br>05    | 0.0071<br>29298 |
| chr1:115053309-<br>115054225_mergedPeaks.1576_SYT6_358705_TRIM<br>33_14            | 1.4456<br>74102 | 9.90E-<br>05    | 0.0072<br>64633 |
| chr17:27278394-<br>27279687_mergedPeaks.14177_PHF12_532_SEZ6_54<br>418             | 1.0094<br>71968 | 9.95E-<br>05    | 0.0072<br>90609 |
| chr16:71322873-<br>71323784_mergedPeaks.13457_HYDIN_58703_CMTR<br>2_181            | 1.1865<br>42941 | 0.0001<br>00469 | 0.0073<br>17299 |
| chr1:1550478-<br>1551392_mergedPeaks.24_MIB2_141_MMP23B_1662<br>4                  | 1.3584<br>19646 | 0.0001<br>01059 | 0.0073<br>46169 |
| chr10:102295359-<br>102296033_mergedPeaks.5017_HIF1AN_56_PAX2_20<br>9771           | 1.9638<br>1076  | 0.0001<br>01454 | 0.0073<br>6077  |
| chr6:17706149-<br>17707404_mergedPeaks.30207_FAM8A1_106259_N<br>UP153_289          | 1.0684<br>67533 | 0.0001<br>03576 | 0.0074<br>71824 |
| chr1:53168607-<br>53169079_mergedPeaks.659_COA7_4805_ZYG11B_2<br>3287              | 2.8550<br>51146 | 0.0001<br>04224 | 0.0074<br>90138 |
| chr7:75987936-<br>75988887_mergedPeaks.33550_YWHAG_69_ZP3_384<br>29                | 1.0532<br>86601 | 0.0001<br>04797 | 0.0075<br>17079 |
| chr16:11890965-                                                                    | 1.1428          | 0.0001          | 0.0076          |

|                                                                       |                 |                 |                 |
|-----------------------------------------------------------------------|-----------------|-----------------|-----------------|
| 11891493_mergedPeaks.12763_ZC3H7A_115_BCAR4_31460                     | 10758           | 06586           | 03276           |
| chr19:4108903-4109619_mergedPeaks.15899_ZBTB7A_42445_MAP2K2_14865     | 1.8922<br>13651 | 0.0001<br>066   | 0.0076<br>03276 |
| chr15:79165002-79165549_mergedPeaks.12208_MORF4L1_153_CTSH_72145      | 1.7427<br>86648 | 0.0001<br>07015 | 0.0076<br>14918 |
| chr11:63705957-63706662_mergedPeaks.6305_RCOR2_21993_NAA40_132        | 1.3334<br>73487 | 0.0001<br>07197 | 0.0076<br>14918 |
| chr16:29984693-29985324_mergedPeaks.12963_TMEN219_11658_TAOK2_179     | 1.0767<br>32191 | 0.0001<br>08251 | 0.0076<br>63395 |
| chr9:37027505-37028031_mergedPeaks.37349_MIR4476_134240_PAX5_6708     | 1.2101<br>79632 | 0.0001<br>09001 | 0.0077<br>02096 |
| chr17:3571617-3572318_mergedPeaks.13906_CTNS_32206_TAX1BP3_6          | 1.5008<br>01799 | 0.0001<br>09975 | 0.0077<br>56485 |
| chr14:24075195-24075849_mergedPeaks.10550_JPH4_27513_DHRS2_30050      | 2.9184<br>62498 | 0.0001<br>11152 | 0.0078<br>24952 |
| chr8:145549912-145550820_mergedPeaks.36857_MIR6848_9388_DGAT1_216     | 1.0170<br>90333 | 0.0001<br>11396 | 0.0078<br>2761  |
| chr9:131451085-131451881_mergedPeaks.38226_SET_5550_PKN3_13318        | 1.0180<br>99389 | 0.0001<br>1167  | 0.0078<br>32381 |
| chr14:77564110-77564764_mergedPeaks.11219_RP11-7F17.3_21903_CIPC_140  | 1.0416<br>53656 | 0.0001<br>12358 | 0.0078<br>5859  |
| chr10:70847599-70848077_mergedPeaks.4569_SRGN_11_VPS26A_36069         | 3.2774<br>43406 | 0.0001<br>1266  | 0.0078<br>5859  |
| chr16:21275081-21275408_mergedPeaks.12848_ANKS4B_30229_CRYM-AS1_36925 | 6.7893<br>58402 | 0.0001<br>12665 | 0.0078<br>5859  |
| chr16:81110146-81111067_mergedPeaks.13632_ATMIN_41149_C16orf46_266    | 1.0788<br>13207 | 0.0001<br>12874 | 0.0078<br>58713 |
| chr1:67660138-67660699_mergedPeaks.862_IL23R_28250_IL12RB2_112628     | 3.7847<br>70349 | 0.0001<br>1321  | 0.0078<br>67707 |
| chr19:1275294-                                                        | 1.3573          | 0.0001          | 0.0078          |

|                                                                            |                      |                 |                 |
|----------------------------------------------------------------------------|----------------------|-----------------|-----------------|
| 1276104_mergedPeaks.15826_C19orf24_180_EFNA2_10453                         | 71901                | 13498           | 73257           |
| chr5:137688033-137688841_mergedPeaks.29131_KDM3B_153_REEP2_86252           | 2.1387<br>69913      | 0.0001<br>13825 | 0.0078<br>81523 |
| chr7:54664423-54664796_mergedPeaks.33383_GS1-18A18.1_39947_SEC61G_162330   | 6.6510<br>49822      | 0.0001<br>14841 | 0.0079<br>37433 |
| chr1:67114480-67115310_mergedPeaks.850_MIR3117_20773_TCTEX1D1_103244       | -<br>1.7097<br>17034 | 0.0001<br>15822 | 0.0079<br>84353 |
| chr3:66633146-66633545_mergedPeaks.22731_LRIG1_82500_KBTBD8_415381         | 7.0180<br>89164      | 0.0001<br>16682 | 0.0080<br>20858 |
| chr1:31538391-31538854_mergedPeaks.383_PUM1_58_NKAIN1_174112               | 1.9658<br>23907      | 0.0001<br>176   | 0.0080<br>69314 |
| chr5:133339818-133340819_mergedPeaks.29069_C5orf15_35912_VDAC1_339         | 1.3768<br>86855      | 0.0001<br>19716 | 0.0081<br>8492  |
| chr22:20849886-20850455_mergedPeaks.21378_SCARF2_58024_MED15_11715         | 1.7647<br>54985      | 0.0001<br>2234  | 0.0083<br>34295 |
| chr6:43445150-43445437_mergedPeaks.30643_TJAP1_33_LRRC73_32788             | 3.9214<br>84557      | 0.0001<br>23009 | 0.0083<br>64827 |
| chr2:156837513-156838078_mergedPeaks.18829_KCNJ3_1282703_AC093375.1_273637 | 6.6505<br>42939      | 0.0001<br>28338 | 0.0086<br>41042 |
| chr1:163291374-163292150_mergedPeaks.2041_NUF2_40_LOC100422212_101219      | 1.3160<br>27355      | 0.0001<br>28376 | 0.0086<br>41042 |
| chr9:125226097-125226668_mergedPeaks.38117_PTGS1_93574_OR1J1_13823         | 3.1008<br>19422      | 0.0001<br>28449 | 0.0086<br>41042 |
| chr21:47878360-47879088_mergedPeaks.21339_PCNT_134689_DIP2A_137            | 1.2008<br>31331      | 0.0001<br>28618 | 0.0086<br>41042 |
| chr3:47517061-47517758_mergedPeaks.22458_PTPN23_94919_SCAP_36              | 1.5083<br>75925      | 0.0001<br>28665 | 0.0086<br>41042 |
| chr5:139943865-139944599_mergedPeaks.29187_APBB3_43_SLC35A4_187            | 1.1218<br>95238      | 0.0001<br>29253 | 0.0086<br>5094  |
| chr1:93426598-93427522_mergedPeaks.1252_SNORA66_120785_FA                  | 1.3007<br>69689      | 0.0001<br>29268 | 0.0086<br>5094  |

|                                                                                      |                 |                 |                 |
|--------------------------------------------------------------------------------------|-----------------|-----------------|-----------------|
| M69A_19                                                                              |                 |                 |                 |
| chr4:25161588-<br>25162519_mergedPeaks.24970_LGI2_129639_SEPSE<br>CS_151             | 1.3207<br>08835 | 0.0001<br>29596 | 0.0086<br>57616 |
| chr1:117544041-<br>117544583_mergedPeaks.1619_PTGFRN_91624_CD1<br>01_59              | 6.8760<br>89673 | 0.0001<br>29896 | 0.0086<br>62401 |
| chr19:15490175-<br>15491015_mergedPeaks.16122_BRD4_99333_AKAP8<br>_17                | 1.0196<br>86203 | 0.0001<br>30674 | 0.0086<br>86089 |
| chr19:2269137-<br>2269769_mergedPeaks.15860_JSRP1_13031_OAZ1_6<br>6                  | 1.2182<br>39639 | 0.0001<br>31021 | 0.0086<br>91609 |
| chr3:110062740-<br>110063226_mergedPeaks.23248_LINC01205_93414<br>7_PVRL3-AS1_725823 | 6.6504<br>20107 | 0.0001<br>31951 | 0.0087<br>38008 |
| chr22:42315835-<br>42316583_mergedPeaks.21605_SHISA8_5538_TNFR<br>SF13C_6612         | 1.6901<br>41237 | 0.0001<br>33315 | 0.0088<br>12946 |
| chr7:915766-<br>916706_mergedPeaks.32616_GET4_46_ADAP1_7808<br>3                     | 1.0863<br>22943 | 0.0001<br>34555 | 0.0088<br>64063 |
| chr6:73393425-<br>73393963_mergedPeaks.31008_KCNQ5_62124_MIR4<br>282_283782          | 6.6621<br>09688 | 0.0001<br>35898 | 0.0089<br>17801 |
| chr9:94877460-<br>94877908_mergedPeaks.37700_ROR2_165240_SPTL<br>C1_72               | 2.3659<br>47438 | 0.0001<br>36051 | 0.0089<br>17801 |
| chr7:77045618-<br>77046154_mergedPeaks.33568_GSAP_169_PTPN12_<br>121465              | 2.7076<br>42688 | 0.0001<br>36539 | 0.0089<br>32728 |
| chr19:6530857-<br>6531498_mergedPeaks.15940_TNFSF9_168_CD70_59<br>986                | 1.2385<br>82195 | 0.0001<br>37255 | 0.0089<br>51879 |
| chr9:117971836-<br>117972225_mergedPeaks.38042_DEC1_67934_RP11-<br>284G10.1_534488   | 2.7312<br>40741 | 0.0001<br>38472 | 0.0090<br>06854 |
| chr21:33651095-<br>33651605_mergedPeaks.21178_LINC00159_192742_<br>MIS18A_26         | 2.2210<br>12195 | 0.0001<br>39355 | 0.0090<br>39025 |
| chr4:26859005-<br>26859417_mergedPeaks.25003_TBC1D19_273666_S<br>TIM2_3101           | 1.7211<br>72613 | 0.0001<br>41064 | 0.0091<br>02716 |
| chr1:117909316-<br>117910253_mergedPeaks.1623_VTCN1_163326_MA                        | 1.0248<br>825   | 0.0001<br>41089 | 0.0091<br>02716 |

|                                                                                |                 |                 |                 |
|--------------------------------------------------------------------------------|-----------------|-----------------|-----------------|
| N1A2_300                                                                       |                 |                 |                 |
| chr19:14800326-<br>14801134_mergedPeaks.16118_EMR3_15000_ZNF33<br>3_139        | 1.0659<br>84893 | 0.0001<br>41297 | 0.0091<br>02716 |
| chr16:1464544-<br>1464983_mergedPeaks.12582_UNKL_42_C16orf91_6<br>038          | 3.6193<br>72112 | 0.0001<br>43387 | 0.0092<br>16759 |
| chr9:34048634-<br>34049655_mergedPeaks.37300_SNORD121A_96292_<br>DCAF12_77627  | 1.0376<br>15652 | 0.0001<br>43553 | 0.0092<br>16759 |
| chr21:38361984-<br>38362631_mergedPeaks.21246_SIM2_290317_HLCS_<br>238         | 1.6379<br>42924 | 0.0001<br>45059 | 0.0092<br>97724 |
| chr5:32585980-<br>32586442_mergedPeaks.27597_SUB1_607_NPR3_12<br>5226          | 1.9385<br>43247 | 0.0001<br>47033 | 0.0094<br>08377 |
| chr7:118476923-<br>118477539_mergedPeaks.34246_ANKRD7_612520_K<br>CND2_1436490 | 1.9816<br>32088 | 0.0001<br>48649 | 0.0094<br>79812 |
| chr2:130938949-<br>130940003_mergedPeaks.18429_SMPD4_146_MZT2<br>B_24          | 1.0250<br>01007 | 0.0001<br>50218 | 0.0095<br>40245 |
| chr1:32538257-<br>32539096_mergedPeaks.401_TMEM39B_174_KPNA6<br>_34967         | 1.3721<br>88197 | 0.0001<br>51035 | 0.0095<br>67671 |
| chr2:3257972-<br>3258773_mergedPeaks.16815_LINC01250_128574_T<br>SSC1_123281   | 2.2140<br>39203 | 0.0001<br>5155  | 0.0095<br>84272 |
| chr14:71373919-<br>71374794_mergedPeaks.11140_PCNX_235_SNORD56<br>B_490697     | 1.4424<br>28478 | 0.0001<br>53512 | 0.0096<br>50398 |
| chr20:61557619-<br>61558075_mergedPeaks.20990_TCFL5_64732_DIDO<br>1_11457      | 2.4956<br>49786 | 0.0001<br>54368 | 0.0096<br>8178  |
| chr16:75032353-<br>75033229_mergedPeaks.13535_WDR59_13774_ZNR<br>F1_123        | 1.3149<br>21705 | 0.0001<br>54889 | 0.0096<br>8888  |
| chr22:23623939-<br>23624229_mergedPeaks.21406_FBXW4P1_19131_CE<br>S5AP1_100229 | 7.0117<br>69959 | 0.0001<br>55966 | 0.0097<br>33791 |
| chr7:96934869-<br>96935400_mergedPeaks.33876_ACN9_189230_TAC1<br>_426136       | 3.8368<br>5555  | 0.0001<br>57312 | 0.0097<br>81463 |
| chr20:43991462-<br>43992259_mergedPeaks.20799_SYS1-                            | 1.2411<br>84919 | 0.0001<br>57504 | 0.0097<br>81463 |

|                                                                      |                 |                 |                 |
|----------------------------------------------------------------------|-----------------|-----------------|-----------------|
| DBNDD2_52_TP53TG5_15097                                              |                 |                 |                 |
| chr15:69452502-69453144_mergedPeaks.12077_LINC00277_79634_GLCE_149   | 1.9262<br>0701  | 0.0001<br>58074 | 0.0097<br>98827 |
| chr15:94849858-94850447_mergedPeaks.12427_RGMA_1217709_MC TP2_49011  | 3.6470<br>85714 | 0.0001<br>591   | 0.0098<br>0501  |
| chr9:5437606-5438161_mergedPeaks.36973_RLN1_98010_PLGRKT_54          | 1.5687<br>80265 | 0.0001<br>59175 | 0.0098<br>0501  |
| chr1:2457523-2458374_mergedPeaks.46_PLCH2_50195_PANK4_87             | 1.1405<br>19207 | 0.0001<br>60983 | 0.0099<br>00333 |
| chr19:58919603-58920170_mergedPeaks.16780_LOC646862_12430_ZNF584_176 | 1.9472<br>27554 | 0.0001<br>62566 | 0.0099<br>60726 |
| chr1:45769129-45769952_mergedPeaks.583_ZSWIM5_97290_LINC01144_41     | 1.1616<br>4962  | 0.0001<br>62787 | 0.0099<br>60726 |
| chr11:125757136-125758184_mergedPeaks.7250_HYLS1_4152_PUS3_15456     | 1.2259<br>64478 | 0.0001<br>63015 | 0.0099<br>60726 |
| chr15:73075894-73076594_mergedPeaks.12122_ADPGK_118_NEO1_268580      | 1.3584<br>31825 | 0.0001<br>63883 | 0.0099<br>92804 |
| chr12:49658469-49659272_mergedPeaks.8051_TUBA1C_6_PRPB_30038         | 1.5191<br>62415 | 0.0001<br>64067 | 0.0099<br>92804 |
| chr3:52739606-52740266_mergedPeaks.22552_SPCS1_80_GLT8D1_163         | 2.1667<br>2022  | 0.0001<br>6627  | 0.0101<br>10779 |
| chr19:47615475-47615883_mergedPeaks.16572_TMEN160_63797_ZC3H4_1330   | 2.1115<br>17073 | 0.0001<br>68531 | 0.0101<br>67424 |
| chr16:68390166-68390830_mergedPeaks.13393_PRMT7_45482_SMPD3_91911    | 6.8100<br>35379 | 0.0001<br>68794 | 0.0101<br>67424 |
| chr2:219264256-219264863_mergedPeaks.19879_CTDSP1_1499_MIR26B_2809   | 1.3785<br>47567 | 0.0001<br>70208 | 0.0102<br>23624 |
| chr6:80044629-80045515_mergedPeaks.31114_HMGN3_100617_LCA5_202075    | 1.4443<br>6868  | 0.0001<br>72006 | 0.0103<br>10855 |
| chr11:121237923-121238661_mergedPeaks.7156_SC5D_74716_SORL1_84619    | 6.5835<br>60267 | 0.0001<br>72471 | 0.0103<br>22417 |

|                                                                                 |                 |                 |                 |
|---------------------------------------------------------------------------------|-----------------|-----------------|-----------------|
| chr6:41747461-<br>41748049_mergedPeaks.30607_FRS3_112_PRICKLE4_744              | 1.5415<br>85856 | 0.0001<br>72844 | 0.0103<br>2588  |
| chr2:223298325-<br>223298843_mergedPeaks.19947_SGPP2_9263_FARS_B_222243         | 6.7694<br>62804 | 0.0001<br>73327 | 0.0103<br>2588  |
| chr2:74433382-<br>74433715_mergedPeaks.17828_MTHFD2_7859_SLC4_A5_108604         | 6.7791<br>89385 | 0.0001<br>73435 | 0.0103<br>2588  |
| chr10:73975550-<br>73976246_mergedPeaks.4602_ANAPC16_141_ASCC1_994              | 1.7131<br>84957 | 0.0001<br>73617 | 0.0103<br>2588  |
| chr3:147802593-<br>147803091_mergedPeaks.23791_ZIC1_675662_AGTR1_612815         | 3.6954<br>5233  | 0.0001<br>74024 | 0.0103<br>33875 |
| chr4:101744213-<br>101745151_mergedPeaks.25941_LINC01216_14841_2_MIR8066_417347 | 1.6970<br>30226 | 0.0001<br>75336 | 0.0103<br>95525 |
| chr15:38746204-<br>38746906_mergedPeaks.11710_FAM98B_228_RASGRP1_110452         | 2.4589<br>72482 | 0.0001<br>77681 | 0.0105<br>18081 |
| chr13:31377055-<br>31377436_mergedPeaks.9463_ALOX5AP_67601_LINC00398_97         | 7.0055<br>40822 | 0.0001<br>78794 | 0.0105<br>47604 |
| chr10:120839892-<br>120840674_mergedPeaks.5298_SNORA19_20633_EIF3A_51           | 1.6222<br>44176 | 0.0001<br>79013 | 0.0105<br>47604 |
| chr11:61100493-<br>61100884_mergedPeaks.6260_DDB1_4_TMEM138_2_8784              | 2.2202<br>51762 | 0.0001<br>8067  | 0.0106<br>28737 |
| chr11:121352549-<br>121352850_mergedPeaks.7164_SORL1_29788_MIR125B1_617853      | 6.9026<br>23294 | 0.0001<br>81215 | 0.0106<br>44258 |
| chr12:52463262-<br>52463733_mergedPeaks.8087_NR4A1_18312_ATG101_260             | 2.2788<br>95482 | 0.0001<br>83423 | 0.0107<br>40727 |
| chr1:160759469-<br>160760300_mergedPeaks.1976_SLAMF7_51038_LY9_5979             | 1.5386<br>29728 | 0.0001<br>84611 | 0.0107<br>74548 |
| chr13:50510234-<br>50510932_mergedPeaks.9725_CTAGE10P_46039_SRRYD7_42           | 1.0136<br>91421 | 0.0001<br>84799 | 0.0107<br>74548 |
| chr15:62352352-<br>62352981_mergedPeaks.11980_VPS13C_2_C2CD4A_6509              | 1.3924<br>44512 | 0.0001<br>85553 | 0.0107<br>74548 |

|                                                                                     |                 |                 |                 |
|-------------------------------------------------------------------------------------|-----------------|-----------------|-----------------|
| chr1:79655700-<br>79656121_mergedPeaks.1027_ELTD1_183415_LPHN<br>2_2610171          | 6.7788<br>78945 | 0.0001<br>86599 | 0.0107<br>74548 |
| chr1:11025551-<br>11025860_mergedPeaks.137_CASZ1_168972_C1orf1<br>27_16389          | 6.8613<br>98045 | 0.0001<br>87208 | 0.0107<br>74548 |
| chr21:34696462-<br>34697553_mergedPeaks.21197_IL10RB_58343_IFNA<br>R1_206           | 1.2150<br>97433 | 0.0001<br>87408 | 0.0107<br>74548 |
| chr14:105487201-<br>105487942_mergedPeaks.11558_CDCA4_146_GPR13<br>2_44316          | 1.1954<br>39217 | 0.0001<br>89336 | 0.0108<br>68935 |
| chr10:23651061-<br>23651510_mergedPeaks.3992_C10orf67_17513_OTU<br>D1_76912         | 6.5783<br>38035 | 0.0001<br>92426 | 0.0110<br>12972 |
| chr17:33894827-<br>33895258_mergedPeaks.14234_SLFN14_9932_SNOR<br>D7_5633           | 2.2118<br>73614 | 0.0001<br>94088 | 0.0110<br>9136  |
| chr17:73900817-<br>73901428_mergedPeaks.14786_TRIM65_8038_MRPL<br>38_59             | 1.1189<br>23149 | 0.0001<br>94574 | 0.0110<br>97491 |
| chr13:24382110-<br>24382500_mergedPeaks.9380_TNFRSF19_228807_C<br>1QTNF9B-AS1_80722 | 2.7269<br>83862 | 0.0001<br>94998 | 0.0110<br>97491 |
| chr2:88354996-<br>88355599_mergedPeaks.17999_KRCC1_49_SMYD1_1<br>2001               | 1.5374<br>00443 | 0.0001<br>95073 | 0.0110<br>97491 |
| chr1:145826787-<br>145827299_mergedPeaks.1699_PDZK1_99378_GPR8<br>9A_60             | 1.9177<br>43415 | 0.0001<br>97025 | 0.0111<br>91797 |
| chr5:137224943-<br>137225319_mergedPeaks.29123_PKD2L2_7_FAM13B<br>_143671           | 2.7623<br>6786  | 0.0001<br>97454 | 0.0111<br>99368 |
| chr6:167502171-<br>167502458_mergedPeaks.32572_FGFR1OP_89510_C<br>CR6_33926         | 6.7153<br>77382 | 0.0001<br>98502 | 0.0112<br>25275 |
| chr2:231084544-<br>231084979_mergedPeaks.20087_SLC16A14_151046_<br>SP110_66         | 6.8226<br>99426 | 0.0001<br>99018 | 0.0112<br>37709 |
| chr11:47663833-<br>47664524_mergedPeaks.6144_C1QTNF4_48217_MTC<br>H2_28             | 1.2143<br>92262 | 0.0002<br>01253 | 0.0112<br>97795 |
| chr20:11492454-<br>11492792_mergedPeaks.20456_LOC339593_238592<br>_LINC00687_358740 | 6.7402<br>96303 | 0.0002<br>0205  | 0.0112<br>97795 |



|                                                                              |                 |                 |                 |
|------------------------------------------------------------------------------|-----------------|-----------------|-----------------|
| chr9:130547381-<br>130548478_mergedPeaks.38202_SH2D3C_14281_MIR3960_182      | 1.1150<br>19466 | 0.0002<br>02441 | 0.0112<br>97795 |
| chr17:17109359-<br>17110074_mergedPeaks.14072_PLD6_70_FLCN_30786             | 1.6669<br>63257 | 0.0002<br>0395  | 0.0113<br>63992 |
| chr8:145634563-<br>145634911_mergedPeaks.36862_CPSF1_4_SLC39A4_4238          | 2.9298<br>09159 | 0.0002<br>04724 | 0.0113<br>90412 |
| chr9:15510210-<br>15511537_mergedPeaks.37084_PSIP1_586_CCDC171_42223         | 1.2912<br>91123 | 0.0002<br>0532  | 0.0114<br>06828 |
| chr16:14013558-<br>14014226_mergedPeaks.12781_SHISA9_1018416_ERCC4_121       | 1.1539<br>85561 | 0.0002<br>06537 | 0.0114<br>57692 |
| chrX:153774949-<br>153775916_mergedPeaks.39742_FAM3A_30866_IKBKG_129         | 1.0846<br>26228 | 0.0002<br>06999 | 0.0114<br>66554 |
| chr9:34646437-<br>34647071_mergedPeaks.37312_GALT_169_IL11RA_7139            | 2.1342<br>86318 | 0.0002<br>09066 | 0.0115<br>64148 |
| chr10:98346256-<br>98347098_mergedPeaks.4953_TLL2_72994_TM9SF3_132           | 1.6276<br>0965  | 0.0002<br>1     | 0.0115<br>98928 |
| chr16:4674454-<br>4675104_mergedPeaks.12669_UBALD1_9852_MGRN1_45             | 2.0680<br>26875 | 0.0002<br>11508 | 0.0116<br>65243 |
| chr2:43422045-<br>43422532_mergedPeaks.17371_AC016735.2_155606_ZFP36L2_31457 | 6.5881<br>87966 | 0.0002<br>14964 | 0.0118<br>21436 |
| chr3:50606376-<br>50607114_mergedPeaks.22521_C3orf18_1522_HEMK1_163          | 1.3636<br>36236 | 0.0002<br>15942 | 0.0118<br>58078 |
| chr16:29606295-<br>29606994_mergedPeaks.12951_SMG1P2_29104_SLC7A5P1_18394    | 1.2937<br>44912 | 0.0002<br>18084 | 0.0119<br>41143 |
| chr22:31063650-<br>31064137_mergedPeaks.21468_DUSP18_21_MIR3200_63650        | 1.9234<br>99049 | 0.0002<br>19366 | 0.0119<br>94013 |
| chr14:55518040-<br>55518558_mergedPeaks.10901_SOCS4_24456_MAPK1IP1L_62       | 2.1586<br>65097 | 0.0002<br>20751 | 0.0120<br>52365 |
| chrX:152864417-<br>152865029_mergedPeaks.39719_FAM58A_91_DUSP9_43173         | 1.6338<br>25874 | 0.0002<br>22546 | 0.0121<br>06437 |

|                                                                                |                      |                 |                 |
|--------------------------------------------------------------------------------|----------------------|-----------------|-----------------|
| chr1:234508844-<br>234509637_mergedPeaks.3318_MIR4671_67028_CO<br>A6_188       | 1.0928<br>35337      | 0.0002<br>22698 | 0.0121<br>06437 |
| chr19:19774313-<br>19775031_mergedPeaks.16226_ATP13A1_169_ZNF1<br>01_4990      | 1.2705<br>24227      | 0.0002<br>24764 | 0.0121<br>52887 |
| chr12:51157490-<br>51158384_mergedPeaks.8073_ATF1_149_TMPRSS12<br>_78763       | 1.4639<br>12555      | 0.0002<br>25154 | 0.0121<br>52887 |
| chr2:220042726-<br>220043211_mergedPeaks.19894_FAM134A_30_ZFAN<br>D2B_28537    | 2.0818<br>87846      | 0.0002<br>25485 | 0.0121<br>53438 |
| chr1:112162209-<br>112162846_mergedPeaks.1535_RAP1A_123_FAM212<br>B-AS1_119935 | 1.4694<br>34869      | 0.0002<br>27342 | 0.0122<br>36169 |
| chr2:135381332-<br>135381742_mergedPeaks.18497_MGAT5_369708_T<br>MEM163_95034  | -<br>6.1918<br>28554 | 0.0002<br>29363 | 0.0123<br>09989 |
| chr16:50402550-<br>50403087_mergedPeaks.13123_MIR6771_76292_BR<br>D7_27        | 2.5141<br>53213      | 0.0002<br>30374 | 0.0123<br>14395 |
| chr6:159420606-<br>159421293_mergedPeaks.32460_C6orf99_111331_R<br>SPH3_249    | 1.4879<br>37151      | 0.0002<br>30415 | 0.0123<br>14395 |
| chr17:30469164-<br>30469654_mergedPeaks.14206_SH3GL1P1_102055_<br>RHOT1_63     | 3.0749<br>24939      | 0.0002<br>30418 | 0.0123<br>14395 |
| chr5:65220893-<br>65221848_mergedPeaks.27998_NLN_203348_ERBB2<br>IP_1011       | 1.5239<br>75068      | 0.0002<br>33994 | 0.0124<br>49298 |
| chrX:70287940-<br>70288665_mergedPeaks.39044_SNX12_4_FOXO4_27<br>696           | 1.4991<br>06212      | 0.0002<br>34054 | 0.0124<br>49298 |
| chr2:46473513-<br>46474325_mergedPeaks.17422_PRKCE_594877_EPA<br>S1_50621      | 6.5708<br>22509      | 0.0002<br>35148 | 0.0124<br>79289 |
| chr9:91003019-<br>91004019_mergedPeaks.37658_SPIN1_223_NXNL2_1<br>46496        | 1.0776<br>4983       | 0.0002<br>35548 | 0.0124<br>81597 |
| chr19:10305238-<br>10305936_mergedPeaks.15997_EIF3G_74988_DNMT<br>1_168        | 1.6466<br>9062       | 0.0002<br>35954 | 0.0124<br>81597 |
| chr7:86781411-<br>86782354_mergedPeaks.33673_DMTF1_206_TMEM2<br>43_67149       | 1.0042<br>16372      | 0.0002<br>38177 | 0.0125<br>52246 |

|                                                                                |                      |                 |                 |
|--------------------------------------------------------------------------------|----------------------|-----------------|-----------------|
| chr12:68758746-<br>68759589_mergedPeaks.8339_MDM1_33006_RAP1B_245451           | 1.2345<br>29219      | 0.0002<br>39541 | 0.0125<br>881   |
| chr5:72112133-<br>72113097_mergedPeaks.28078_LOC102477328_156119_TNPO1_31314   | 1.4042<br>05765      | 0.0002<br>39768 | 0.0125<br>881   |
| chr3:129158638-<br>129159416_mergedPeaks.23563_MBD4_5_RHO_88454                | 1.0160<br>28581      | 0.0002<br>39852 | 0.0125<br>881   |
| chr14:96857883-<br>96858635_mergedPeaks.11467_GSKIP_27187_AK7_188              | 1.0019<br>41781      | 0.0002<br>40603 | 0.0126<br>10056 |
| chr18:42258911-<br>42259576_mergedPeaks.15314_LOC101927921_147581_SETBP1_1619  | 1.9720<br>49283      | 0.0002<br>41915 | 0.0126<br>61334 |
| chr1:191143268-<br>191143913_mergedPeaks.2510_RP11-463J7.2_549571_RGS18_984001 | 3.5988<br>68849      | 0.0002<br>42366 | 0.0126<br>67487 |
| chrX:52949904-<br>52950667_mergedPeaks.38926_FAM156B_21877_FAM156A_74366       | 1.4814<br>75341      | 0.0002<br>43035 | 0.0126<br>7524  |
| chr9:99328870-<br>99329378_mergedPeaks.37752_HABP4_116688_CDC14B_79            | 2.3836<br>97733      | 0.0002<br>43511 | 0.0126<br>7524  |
| chr8:67687191-<br>67687985_mergedPeaks.35608_PTTG3P_7348_MCMDC2_96148          | 1.2295<br>70991      | 0.0002<br>43638 | 0.0126<br>7524  |
| chr4:140222257-<br>140222951_mergedPeaks.26486_MGARP_21112_NAA15_71            | 1.1412<br>20337      | 0.0002<br>44366 | 0.0126<br>7524  |
| chr4:84376601-<br>84377448_mergedPeaks.25691_HPSE_121058_HELQ_1                | 1.3243<br>0773       | 0.0002<br>44519 | 0.0126<br>7524  |
| chr10:32635017-<br>32636370_mergedPeaks.4125_KIF5B_290322_EPC1_453             | 1.0257<br>26929      | 0.0002<br>47398 | 0.0127<br>73956 |
| chr11:448033-<br>448530_mergedPeaks.5468_ANO9_6270_PTDSS2_1998                 | 2.2351<br>93789      | 0.0002<br>48497 | 0.0128<br>11453 |
| chr5:14144960-<br>14145644_mergedPeaks.27427_TRIO_1474_FAM105A_436588          | -<br>1.2911<br>92624 | 0.0002<br>49714 | 0.0128<br>56704 |
| chr5:131831488-<br>131832376_mergedPeaks.29047_IRF1_5467_IL5_47282             | 1.2185<br>53778      | 0.0002<br>52012 | 0.0129<br>54784 |

|                                                                              |                 |                 |                 |
|------------------------------------------------------------------------------|-----------------|-----------------|-----------------|
| chr1:117113237-<br>117113836_mergedPeaks.1608_ATP1A1OS_152339_CD58_179       | 1.8374<br>40104 | 0.0002<br>52581 | 0.0129<br>54784 |
| chr1:37939921-<br>37940602_mergedPeaks.464_ZC3H12A_143_MIR673_2_5569         | 1.4614<br>75285 | 0.0002<br>52643 | 0.0129<br>54784 |
| chrX:17755112-<br>17755664_mergedPeaks.38561_NHS_101976_SCML1_180            | 1.2210<br>84348 | 0.0002<br>56982 | 0.0131<br>4176  |
| chr22:23277556-<br>23278316_mergedPeaks.21402_IGLL5_47977_GNAZ_134732        | 1.1049<br>14944 | 0.0002<br>57727 | 0.0131<br>62125 |
| chr19:8578523-<br>8579239_mergedPeaks.15979_PRAM1_11343_ZNF414_167           | 1.3839<br>6399  | 0.0002<br>63817 | 0.0134<br>36951 |
| chr20:813972-<br>814542_mergedPeaks.20286_SLC52A3_65029_FAM110A_7660         | 1.5202<br>88055 | 0.0002<br>64764 | 0.0134<br>67131 |
| chr17:15902740-<br>15903499_mergedPeaks.14054_ZSWIM7_113_NCOR1_194834        | 1.5164<br>97771 | 0.0002<br>65177 | 0.0134<br>70072 |
| chr6:99872604-<br>99873872_mergedPeaks.31382_PNISR_31_USP45_90014            | 1.0865<br>89472 | 0.0002<br>67457 | 0.0135<br>67716 |
| chr10:5734526-<br>5735101_mergedPeaks.3681_FAM208B_8013_GDI2_120699          | 2.4595<br>75718 | 0.0002<br>69217 | 0.0136<br>38794 |
| chr10:104180500-<br>104181292_mergedPeaks.5043_FBXL15_1326_CUEDC2_11527      | 1.3469<br>43588 | 0.0002<br>72831 | 0.0137<br>6671  |
| chr17:7142706-<br>7143296_mergedPeaks.13966_PHF23_752_GABARAP_2752           | 1.1312<br>62672 | 0.0002<br>74159 | 0.0137<br>7369  |
| chr11:62341216-<br>62341830_mergedPeaks.6274_EEF1G_63_TUT1_17586             | 1.0552<br>16464 | 0.0002<br>745   | 0.0137<br>7369  |
| chr21:19220497-<br>19220975_mergedPeaks.21073_C21orf91_29033_CHODL-AS1_37189 | 3.1371<br>69495 | 0.0002<br>74665 | 0.0137<br>7369  |
| chr6:33756665-<br>33757121_mergedPeaks.30527_IP6K3_42131_LEMD2_13            | 2.5595<br>25387 | 0.0002<br>74999 | 0.0137<br>7369  |
| chr17:28256785-<br>28257471_mergedPeaks.14189_CORO6_308687_SSH2_118          | 1.6722<br>77577 | 0.0002<br>75147 | 0.0137<br>7369  |

|                                                                          |                 |                 |                 |
|--------------------------------------------------------------------------|-----------------|-----------------|-----------------|
| chr16:88729317-88729975_mergedPeaks.13804_MVD_151_SNAI3-AS1_134          | 1.0457<br>63103 | 0.0002<br>78564 | 0.0139<br>26344 |
| chr15:64995021-64995701_mergedPeaks.12018_ZNF609_203743_OAZ2_101         | 1.7488<br>80128 | 0.0002<br>7914  | 0.0139<br>368   |
| chr12:56511654-56512357_mergedPeaks.8164_RPL41_1632_ZC3H10_24            | 1.1440<br>93713 | 0.0002<br>79705 | 0.0139<br>4666  |
| chr7:111720473-111720963_mergedPeaks.34119_DOCK4-AS1_272158_DOCK4_125744 | 6.5815<br>57592 | 0.0002<br>88624 | 0.0143<br>62692 |
| chr19:17336843-17337553_mergedPeaks.16152_OCEL1_144_NR2F6_18953          | 1.0062<br>10596 | 0.0002<br>90557 | 0.0144<br>05228 |
| chr1:33282814-33283414_mergedPeaks.413_KIAA1522_75603_S100PBP_4          | 1.1786<br>23447 | 0.0002<br>908   | 0.0144<br>05228 |
| chr1:155532392-155533223_mergedPeaks.1862_ASH1L_483_MSTO1_47153          | 1.4508<br>07637 | 0.0002<br>93313 | 0.0145<br>10761 |
| chr8:61693160-61693818_mergedPeaks.35504_CHD7_102166_LOC100130298_186818 | 2.9681<br>25822 | 0.0002<br>94592 | 0.0145<br>55092 |
| chr20:5054830-5055341_mergedPeaks.20344_SLC23A2_64146_TMEM230_38648      | 6.8313<br>03404 | 0.0002<br>96098 | 0.0146<br>10458 |
| chr9:19048921-19049650_mergedPeaks.37110_MIR3152_475982_FAM154A_67       | 1.2502<br>40085 | 0.0002<br>96809 | 0.0146<br>26515 |
| chr16:3184717-3185364_mergedPeaks.12637_RP11-473M20.14_157_ZNF213_93     | 1.6254<br>05444 | 0.0002<br>98099 | 0.0146<br>52033 |
| chr12:39861113-39861694_mergedPeaks.7898_KIF21A_24211_ABCD2_152440       | 3.0668<br>00509 | 0.0002<br>99263 | 0.0146<br>70197 |
| chr5:118272994-118273637_mergedPeaks.28813_RP11-2N5.1_341433_DTWD2_50925 | 6.5908<br>60814 | 0.0002<br>99572 | 0.0146<br>70197 |
| chr9:100684296-100685006_mergedPeaks.37774_FOXC1_69115_C9orf156_201      | 1.1848<br>49179 | 0.0002<br>99628 | 0.0146<br>70197 |
| chr3:195642021-195642299_mergedPeaks.24638_TNK2_19728_SDHAP1_74990       | 6.8204<br>0094  | 0.0003<br>05215 | 0.0149<br>04885 |
| chr7:28448757-                                                           | 6.6579          | 0.0003          | 0.0149          |

|                                                                                    |                 |                 |                 |
|------------------------------------------------------------------------------------|-----------------|-----------------|-----------------|
| 28449082_mergedPeaks.33047_JAZF1_228482_CREB<br>5_276801                           | 51174           | 07051           | 46446           |
| chr13:33762399-<br>33763046_mergedPeaks.9496_KL_172152_STARD13<br>_17465           | 6.4990<br>3007  | 0.0003<br>07634 | 0.0149<br>46446 |
| chrX:16041929-<br>16042765_mergedPeaks.38534_AP1S2_169210_GRP<br>R_99076           | 1.8256<br>51966 | 0.0003<br>11952 | 0.0150<br>93051 |
| chr20:61492978-<br>61493585_mergedPeaks.20989_TCFL5_166_DIDO1_7<br>6023            | 1.4281<br>79153 | 0.0003<br>12243 | 0.0150<br>93051 |
| chr7:120627719-<br>120628075_mergedPeaks.34285_ING3_37081_CPED<br>1_853            | 6.5058<br>04589 | 0.0003<br>14819 | 0.0151<br>98211 |
| chr13:77600317-<br>77601660_mergedPeaks.9983_CLN5_34930_FBXL3_3<br>43              | 1.0462<br>86874 | 0.0003<br>15272 | 0.0152<br>00775 |
| chr3:113774975-<br>113775975_mergedPeaks.23329_KIAA1407_15_QTR<br>TD1_106          | 1.0744<br>44888 | 0.0003<br>17386 | 0.0152<br>64542 |
| chr7:7606216-7606987_mergedPeaks.32742_RP5-<br>115904.2_905_MIOS_14                | 1.0494<br>94373 | 0.0003<br>1889  | 0.0152<br>90065 |
| chr3:72031771-<br>72032137_mergedPeaks.22807_PROK2_197597_LIN<br>C00877_117652     | 6.5133<br>40847 | 0.0003<br>19139 | 0.0152<br>90065 |
| chr13:103659179-<br>103659994_mergedPeaks.10335_METTL21EP_12713<br>8_SLC10A2_59610 | 2.5416<br>94555 | 0.0003<br>20394 | 0.0153<br>30836 |
| chr2:203240581-<br>203241154_mergedPeaks.19626_SNORD11_83094_B<br>MPR2_182         | 1.3766<br>00268 | 0.0003<br>22306 | 0.0154<br>02906 |
| chr16:88923154-<br>88923730_mergedPeaks.13813_GALNS_68_TRAPPC2<br>L_63             | 1.1665<br>27859 | 0.0003<br>25762 | 0.0155<br>48478 |
| chr3:183892252-<br>183892845_mergedPeaks.24436_DVL3_19265_AP2M<br>1_85             | 1.2179<br>16308 | 0.0003<br>26294 | 0.0155<br>54321 |
| chr1:54303649-<br>54304435_mergedPeaks.671_GLIS1_104165_NDC1_1<br>83               | 1.3384<br>57738 | 0.0003<br>26902 | 0.0155<br>6375  |
| chr15:22387293-<br>22387708_mergedPeaks.11596_OR4N4_5028_OR4N<br>3P_25961          | 6.7953<br>39016 | 0.0003<br>29005 | 0.0156<br>44221 |
| chr19:50887141-<br>50887901_mergedPeaks.16649_NR1H2_7842_POLD1                     | 1.2217<br>39012 | 0.0003<br>3186  | 0.0157<br>40553 |

|                                                                                   |                      |                 |                 |
|-----------------------------------------------------------------------------------|----------------------|-----------------|-----------------|
| _58                                                                               |                      |                 |                 |
| chr16:22448291-<br>22448991_mergedPeaks.12871_SMG1P1_313_RRN3P<br>3_395           | 2.0728<br>58152      | 0.0003<br>35467 | 0.0158<br>59487 |
| chr10:90639911-<br>90640837_mergedPeaks.4840_STAMBPL1_431_FAS_<br>109913          | 1.2729<br>49238      | 0.0003<br>35514 | 0.0158<br>59487 |
| chr10:69834400-<br>69835255_mergedPeaks.4550_SIRT1_189889_HERC<br>4_276           | 1.1172<br>97496      | 0.0003<br>35622 | 0.0158<br>59487 |
| chr15:59041730-<br>59042401_mergedPeaks.11940_HSP90AB4P_56259_<br>ADAM10_112      | 1.1681<br>35959      | 0.0003<br>36573 | 0.0158<br>84672 |
| chr12:105724074-<br>105724715_mergedPeaks.8966_APPL2_97211_C12or<br>f75_19        | 1.1817<br>44805      | 0.0003<br>37369 | 0.0158<br>84688 |
| chr17:41399935-<br>41400174_mergedPeaks.14343_LINC00854_18992_L<br>INC00910_66212 | 6.8369<br>51933      | 0.0003<br>37411 | 0.0158<br>84688 |
| chr8:128300294-<br>128301023_mergedPeaks.36589_CCAT1_69145_CCA<br>T2_111985       | 2.9770<br>91232      | 0.0003<br>37889 | 0.0158<br>87491 |
| chr9:6917103-<br>6917598_mergedPeaks.37022_KDM4C_196488_TME<br>M261_882449        | 6.5674<br>36368      | 0.0003<br>38776 | 0.0159<br>09491 |
| chr7:95099806-<br>95100237_mergedPeaks.33843_PON2_35637_ASB4_<br>15191            | -<br>3.9572<br>99518 | 0.0003<br>40885 | 0.0159<br>88739 |
| chr22:41488489-<br>41488717_mergedPeaks.21587_MIR1281_87_EP300_<br>10             | 3.9338<br>48204      | 0.0003<br>42444 | 0.0160<br>24315 |
| chr7:45808276-<br>45808954_mergedPeaks.33307_ADCY1_194877_SEP<br>T7P2_2           | 1.2871<br>15087      | 0.0003<br>43701 | 0.0160<br>35443 |
| chr6:83299418-<br>83299777_mergedPeaks.31157_TPBG_225637_UBE3<br>D_475948         | -<br>6.1654<br>59665 | 0.0003<br>44101 | 0.0160<br>35443 |
| chr16:15248453-<br>15249105_mergedPeaks.12802_RRN3_60621_MIR31<br>80-4_80         | 1.3978<br>90848      | 0.0003<br>4419  | 0.0160<br>35443 |
| chr19:46389570-<br>46390202_mergedPeaks.16558_IRF2BP1_510_MYPO<br>P_15976         | 1.5969<br>56869      | 0.0003<br>4458  | 0.0160<br>35443 |
| chr2:42396195-<br>42396965_mergedPeaks.17351_EML4_91_AC083949.                    | 1.3877<br>76923      | 0.0003<br>44839 | 0.0160<br>35443 |

|                                                                             |                 |                 |                 |
|-----------------------------------------------------------------------------|-----------------|-----------------|-----------------|
| 1_791                                                                       |                 |                 |                 |
| chr16:81865233-81865737_mergedPeaks.13672_PLCG2_52623_SDR42E1_179608        | 3.0028<br>54969 | 0.0003<br>4671  | 0.0160<br>71695 |
| chr2:216705303-216705828_mergedPeaks.19820_AC012462.2_387136_LINC00607_2694 | 6.4983<br>45745 | 0.0003<br>4936  | 0.0161<br>46748 |
| chr14:24711382-24712223_mergedPeaks.10571_GMPR2_9725_TINF2_78               | 1.0533<br>69809 | 0.0003<br>53003 | 0.0162<br>95242 |
| chr21:40817295-40818157_mergedPeaks.21272_LCA5L_1598_SH3BGR_70              | 1.7956<br>57577 | 0.0003<br>5508  | 0.0163<br>71226 |
| chr8:42248410-42248769_mergedPeaks.35288_DKK4_13915_VDAC3_689               | 6.5021<br>4568  | 0.0003<br>56438 | 0.0164<br>13898 |
| chrX:48776059-48776691_mergedPeaks.38894_SLC35A2_7140_PIM2_38               | 1.3616<br>23946 | 0.0003<br>58141 | 0.0164<br>72333 |
| chr9:73034850-73035517_mergedPeaks.37465_KLF9_5610_MIR204_389817            | 1.6162<br>87367 | 0.0003<br>59333 | 0.0165<br>07148 |
| chr20:62612202-62612620_mergedPeaks.21017_SAMD10_1416_PRPF6_19              | 2.0854<br>74551 | 0.0003<br>60089 | 0.0165<br>21838 |
| chr19:34850031-34850712_mergedPeaks.16295_KIAA0355_104916_GPI_5273          | 1.0640<br>33009 | 0.0003<br>60677 | 0.0165<br>26047 |
| chr7:90242294-90242862_mergedPeaks.33739_CDK14_16903_FZD1_651204            | 6.4246<br>75787 | 0.0003<br>61051 | 0.0165<br>26047 |
| chr15:72668089-72668726_mergedPeaks.12117_CELF6_55882_HEXAS1_46             | 1.7131<br>3956  | 0.0003<br>64706 | 0.0166<br>47886 |
| chr10:50570505-50571081_mergedPeaks.4275_C10orf71_63607_DRGX_33269          | 3.5841<br>25076 | 0.0003<br>65029 | 0.0166<br>47886 |
| chr3:46249820-46250057_mergedPeaks.22440_CCR1_106_CCR3_33933                | 6.7192<br>80908 | 0.0003<br>67009 | 0.0167<br>18057 |
| chr1:35318281-35318631_mergedPeaks.432_GJA4_59858_SMIM12_6190               | 7.0350<br>1807  | 0.0003<br>74365 | 0.0170<br>06139 |
| chr1:10534874-10535216_mergedPeaks.135_PEX14_43_CASZ1_3216                  | 6.6299<br>97739 | 0.0003<br>74723 | 0.0170<br>06139 |



|                                                                        |                 |                 |                 |
|------------------------------------------------------------------------|-----------------|-----------------|-----------------|
| 88                                                                     |                 |                 |                 |
| chr6:91078688-91079269_mergedPeaks.31280_MIR4464_56518_MAPP3K7_218042  | 2.9063<br>07999 | 0.0003<br>75126 | 0.0170<br>06139 |
| chr12:24894174-24894553_mergedPeaks.7714_LINC00477_157261_BCAT1_161646 | 6.4222<br>27864 | 0.0003<br>75761 | 0.0170<br>14636 |
| chr15:40732826-40733369_mergedPeaks.11742_IVD_35412_BAHD1_313          | 1.2184<br>21698 | 0.0003<br>79763 | 0.0171<br>34471 |
| chr7:5229518-5230103_mergedPeaks.32691_ZNF890P_45633_WIP12_24089       | 1.6184<br>53235 | 0.0003<br>80516 | 0.0171<br>4809  |
| chr5:140026845-140027669_mergedPeaks.29189_TMCO6_8246_NDUFA2_113       | 1.3347<br>08394 | 0.0003<br>81621 | 0.0171<br>77462 |
| chr3:197025309-197025691_mergedPeaks.24666_DLG1-AS1_383_DLG1_643       | 2.0802<br>33586 | 0.0003<br>83471 | 0.0171<br>99892 |
| chr7:26904008-26904703_mergedPeaks.33035_SKAP2_14_HOXA1_231270         | 1.1016<br>3516  | 0.0003<br>8353  | 0.0171<br>99892 |
| chr19:58858825-58859209_mergedPeaks.16775_MIR6806_12964_A1BG-AS1_4318  | 3.1939<br>4402  | 0.0003<br>83626 | 0.0171<br>99892 |
| chr19:12833330-12833687_mergedPeaks.16065_TNPO2_403_C19orf43_12021     | 3.3806<br>30516 | 0.0003<br>84793 | 0.0171<br>99892 |
| chr19:41869564-41870377_mergedPeaks.16449_TGFB1_10132_B9D2_108         | 1.3994<br>94129 | 0.0003<br>85491 | 0.0172<br>08772 |
| chr1:231473387-231474213_mergedPeaks.3272_SPRTN_119_EGLN1_86990        | 1.5212<br>5453  | 0.0003<br>86979 | 0.0172<br>14342 |
| chr2:48009911-48010824_mergedPeaks.17449_MSH6_147_FBXO11_122565        | 1.2814<br>26306 | 0.0003<br>87339 | 0.0172<br>14342 |
| chr12:57916184-57916720_mergedPeaks.8202_DDIT3_2152_MBD6_206           | 1.2177<br>08791 | 0.0003<br>87522 | 0.0172<br>14342 |
| chr16:4303586-4304382_mergedPeaks.12656_RP11-95P2.1_194_TFAP4_19017    | 1.1401<br>9694  | 0.0003<br>8805  | 0.0172<br>14342 |
| chr19:10349833-10350349_mergedPeaks.16001_S1PR2_8143_MRPL4_12548       | 1.6279<br>18321 | 0.0003<br>88338 | 0.0172<br>14342 |

|                                                                                   |                      |                 |                 |
|-----------------------------------------------------------------------------------|----------------------|-----------------|-----------------|
| chr19:47777352-<br>47778262_mergedPeaks.16580_PRR24_149_C5AR1_35296               | 1.1640<br>19221      | 0.0003<br>91928 | 0.0173<br>32984 |
| chr17:73663149-<br>73663617_mergedPeaks.14779_RECQL5_114_SAP30BP_15               | 1.7604<br>36043      | 0.0003<br>92669 | 0.0173<br>45564 |
| chr12:63034657-<br>63035286_mergedPeaks.8240_MIRLET7I_37506_PP<br>M1H_293694      | 6.4894<br>80721      | 0.0003<br>94755 | 0.0174<br>07232 |
| chr10:85954163-<br>85954442_mergedPeaks.4768_C10orf99_20749_CDH<br>R1_88          | 6.5064<br>58754      | 0.0003<br>9543  | 0.0174<br>07232 |
| chr19:39340031-<br>39340288_mergedPeaks.16393_ECH1_17662_HNRN<br>PL_2820          | 1.8496<br>73294      | 0.0003<br>95781 | 0.0174<br>07232 |
| chr1:40626822-<br>40627265_mergedPeaks.507_RLF_3_TMCO2_86529                      | 2.1468<br>84407      | 0.0003<br>96812 | 0.0174<br>27116 |
| chr18:41613131-<br>41613584_mergedPeaks.15308_SYT4_755742_LOC1<br>01927921_498305 | 6.5712<br>28563      | 0.0003<br>97807 | 0.0174<br>37033 |
| chr17:30185887-<br>30186496_mergedPeaks.14202_MIR365B_283762_C<br>OPRS_135        | 2.5102<br>11518      | 0.0003<br>98215 | 0.0174<br>37033 |
| chr9:14585598-<br>14586182_mergedPeaks.37067_NFIB_271845_ZDHH<br>C21_107590       | -<br>1.5141<br>53151 | 0.0003<br>98416 | 0.0174<br>37033 |
| chr13:60308419-<br>60309028_mergedPeaks.9800_PCDH17_2102935_DI<br>APH3-AS1_278128 | -<br>1.9023<br>27111 | 0.0004<br>00935 | 0.0175<br>06861 |
| chr8:42911082-<br>42911915_mergedPeaks.35301_FNTA_57_POMK_371<br>50               | 1.1715<br>58049      | 0.0004<br>03083 | 0.0175<br>52507 |
| chr9:21444152-<br>21444638_mergedPeaks.37160_IFNA1_3943_IFNE_3<br>7917            | 6.6524<br>41834      | 0.0004<br>03654 | 0.0175<br>52507 |
| chr6:26157678-<br>26158784_mergedPeaks.30344_HIST1H1E_1673_HIS<br>T1H2BD_117      | 1.2962<br>80538      | 0.0004<br>04227 | 0.0175<br>52507 |
| chr7:100860803-<br>100861524_mergedPeaks.33955_PLOD3_152_CLDN1<br>5_20064         | 1.9566<br>08165      | 0.0004<br>04755 | 0.0175<br>52507 |
| chr7:102036423-<br>102037040_mergedPeaks.33971_LOC100630923_32<br>424_PRKRIP1_72  | 1.6881<br>78315      | 0.0004<br>07744 | 0.0176<br>61919 |
| chr2:101868884-                                                                   | 1.0941               | 0.0004          | 0.0176          |

|                                                                                     |                      |                 |                 |
|-------------------------------------------------------------------------------------|----------------------|-----------------|-----------------|
| 101869855_mergedPeaks.18100_CNOR11_25_SNOR<br>D89_20142                             | 40801                | 08615           | 79454           |
| chr21:33031627-<br>33032486_mergedPeaks.21176_SOD1_122_SCAF4_72<br>375              | 1.1059<br>38402      | 0.0004<br>09745 | 0.0177<br>08175 |
| chr10:64415139-<br>64415702_mergedPeaks.4471_LOC283045_280534_<br>ADO_149095        | 1.9945<br>72758      | 0.0004<br>13027 | 0.0177<br>94318 |
| chrX:112984162-<br>112984595_mergedPeaks.39354_LOC101928437_69<br>8424_HTR2C_834172 | -<br>2.9670<br>8765  | 0.0004<br>16009 | 0.0178<br>77101 |
| chr12:57081784-<br>57082466_mergedPeaks.8184_PTGES3_344_NACA_3<br>6941              | 1.2331<br>58949      | 0.0004<br>17165 | 0.0179<br>06493 |
| chr2:85444075-<br>85444664_mergedPeaks.17961_TCF7L1_83787_TGO<br>LN2_111050         | 6.5113<br>76007      | 0.0004<br>18095 | 0.0179<br>26111 |
| chr1:9687046-<br>9687364_mergedPeaks.123_TMEN201_38274_PIK3C<br>D_24584             | 2.2780<br>57541      | 0.0004<br>21706 | 0.0180<br>60519 |
| chr8:40031934-<br>40032469_mergedPeaks.35257_C8orf4_21215_ZMAT<br>4_723142          | 6.6174<br>7062       | 0.0004<br>25246 | 0.0181<br>91625 |
| chr5:86399491-<br>86399916_mergedPeaks.28264_LOC100505878_357<br>069_MIR4280_11068  | -<br>5.9632<br>06503 | 0.0004<br>26077 | 0.0182<br>05771 |
| chr7:81246221-<br>81246766_mergedPeaks.33602_SEMA3C_697826_HG<br>F_152959           | 6.7385<br>93992      | 0.0004<br>27436 | 0.0182<br>23676 |
| chr3:50654185-<br>50654741_mergedPeaks.22524_CISH_5201_MAPKAP<br>K3_98              | 1.4326<br>83714      | 0.0004<br>28745 | 0.0182<br>52116 |
| chr14:96968090-<br>96968969_mergedPeaks.11469_AK7_110082_PAPOL<br>A_183             | 1.3600<br>59586      | 0.0004<br>29065 | 0.0182<br>52116 |
| chr10:27531877-<br>27532145_mergedPeaks.4058_ACBD5_943_LRRC37A<br>6P_9224           | 3.8658<br>89023      | 0.0004<br>41352 | 0.0187<br>14594 |
| chr9:72873480-<br>72874405_mergedPeaks.37461_SMC5_65_KLF9_155<br>631                | 1.1813<br>69777      | 0.0004<br>45129 | 0.0188<br>50901 |
| chr1:1509900-<br>1510525_mergedPeaks.23_TMEN240_34472_SSU72_<br>50                  | 1.8047<br>35355      | 0.0004<br>46597 | 0.0188<br>91983 |
| chr17:40075098-                                                                     | 1.3324               | 0.0004          | 0.0190          |

|                                                                       |                      |                 |                 |
|-----------------------------------------------------------------------|----------------------|-----------------|-----------------|
| 40075642_mergedPeaks.14313_ACLY_98_TTC25_11505                        | 9164                 | 50681           | 22345           |
| chr8:26148706-26149566_mergedPeaks.35072_EBF2_246496_PPP2R2A_1595     | 1.0727<br>84987      | 0.0004<br>52949 | 0.0190<br>75657 |
| chr21:33104013-33104934_mergedPeaks.21177_SCAF4_42_HUNK_141154        | 1.1309<br>26448      | 0.0004<br>54319 | 0.0191<br>12114 |
| chr3:14692827-14693464_mergedPeaks.21933_GRIP2_109557_CCD C174_107    | 1.3641<br>68273      | 0.0004<br>55144 | 0.0191<br>25623 |
| chr1:3541110-3541728_mergedPeaks.58_MEGF6_13360_TPRG1L_136            | 1.1747<br>95237      | 0.0004<br>60775 | 0.0193<br>25037 |
| chr7:5258223-5258807_mergedPeaks.32692_WIPI2_4616_SLC29A4_64045       | -<br>1.4611<br>49803 | 0.0004<br>61417 | 0.0193<br>25037 |
| chr6:122792567-122793449_mergedPeaks.31749_SERINC1_56_PKIB_180865     | 1.4164<br>25947      | 0.0004<br>63547 | 0.0193<br>89126 |
| chr15:52758233-52758839_mergedPeaks.11880_MYO5C_170541_MY O5A_62711   | 1.8534<br>80464      | 0.0004<br>64843 | 0.0193<br>89126 |
| chr3:173113241-173113538_mergedPeaks.24237_SPATA16_254331_NLGN1_2848  | -<br>2.9583<br>74439 | 0.0004<br>64864 | 0.0193<br>89126 |
| chr8:67025181-67026265_mergedPeaks.35590_DNAJC5B_91933_TRIM55_13554   | 1.1969<br>32361      | 0.0004<br>64992 | 0.0193<br>89126 |
| chr10:30024182-30024890_mergedPeaks.4078_SVIL_100635_KIAA1462_323952  | 2.3897<br>69756      | 0.0004<br>67158 | 0.0194<br>25657 |
| chr15:86189737-86190160_mergedPeaks.12311_AKAP13_26768_MIR1276_123861 | 6.5173<br>69288      | 0.0004<br>67751 | 0.0194<br>25657 |
| chr12:114435129-114435531_mergedPeaks.9084_RBM19_31154_TBX5_408638    | 6.6932<br>84948      | 0.0004<br>67915 | 0.0194<br>25657 |
| chr15:101791823-101792725_mergedPeaks.12538_CHSY1_137_VIMP_25451      | 1.6033<br>39155      | 0.0004<br>69525 | 0.0194<br>57256 |
| chr1:2517675-2518275_mergedPeaks.55_FAM213B_77_MMEL1_46506            | 1.3242<br>05702      | 0.0004<br>70525 | 0.0194<br>57256 |
| chr20:32890646-                                                       | 1.3238               | 0.0004          | 0.0195          |

|                                                                          |              |             |             |
|--------------------------------------------------------------------------|--------------|-------------|-------------|
| 32891362_mergedPeaks.20674_ASIP_42834_AHCY_211                           | 20443        | 73932       | 20032       |
| chr22:21271308-21272086_mergedPeaks.21382_SNAP29_58406_CRK_L_16          | 1.2584493    | 0.0004742   | 0.019520032 |
| chr17:49338192-49338467_mergedPeaks.14469_UTP18_433_RP11-1018N14.1_74194 | 2.195977521  | 0.00047428  | 0.019520032 |
| chr19:58789910-58790483_mergedPeaks.16772_ZNF544_50127_ZNF8_121          | 1.128877935  | 0.000474304 | 0.019520032 |
| chr7:84305114-84305427_mergedPeaks.33653_AC003984.1_143479_SEMA3D_445977 | -5.988615289 | 0.000477496 | 0.019628037 |
| chr19:41222633-41223261_mergedPeaks.16439_ADCK4_157_ITPKC_60             | 1.271275756  | 0.000477963 | 0.019628037 |
| chr21:48055154-48056049_mergedPeaks.21340_PRMT2_95_NA_INF                | 1.310346086  | 0.000481845 | 0.019743263 |
| chrX:148959162-148959413_mergedPeaks.39688_LINC00850_655_MAGEA8_50653    | -4.407752393 | 0.000484157 | 0.019754112 |
| chr8:59323637-59324183_mergedPeaks.35462_UBXN2B_88_CYP7A1_88810          | 1.995143028  | 0.000488231 | 0.019898961 |
| chr2:192058611-192059320_mergedPeaks.19407_STAT4_42643_MYO1B_51141       | 1.347110404  | 0.000490814 | 0.019945899 |
| chr17:7591401-7591810_mergedPeaks.13983_WRAP53_2217_EFNB3_16914          | 2.192397343  | 0.000491306 | 0.019945899 |
| chr4:170019155-170020039_mergedPeaks.26996_CBR4_88129_SH3RF1_172652      | 2.469681106  | 0.000491485 | 0.019945899 |
| chr8:145733889-145734693_mergedPeaks.36870_GPT_4827_MFSD3_260            | 1.048311963  | 0.000494921 | 0.020057401 |
| chr7:31745105-31745430_mergedPeaks.33107_PPP1R17_18637_PDE1C_365207      | 6.570157835  | 0.000495794 | 0.020057401 |
| chr6:27858326-27858861_mergedPeaks.30401_HIST1H3J_23_HIST1H2AM_2370      | 1.330749191  | 0.000495903 | 0.020057401 |
| chr3:61566963-61567339_mergedPeaks.22674_PTPRG_19909_PTPR                | 6.879894992  | 0.000496347 | 0.020057401 |

|                                                                                 |                      |                 |                 |
|---------------------------------------------------------------------------------|----------------------|-----------------|-----------------|
| G-AS1_737471                                                                    |                      |                 |                 |
| chr7:76751403-<br>76752069_mergedPeaks.33558_PMS2P9_82940_CCD<br>C146_197       | 1.0934<br>26917      | 0.0004<br>97886 | 0.0200<br>76808 |
| chr3:101695391-<br>101695826_mergedPeaks.23114_LOC152225_35906<br>_ZPLD1_458250 | 6.4916<br>14537      | 0.0004<br>98551 | 0.0200<br>82279 |
| chr18:51777134-<br>51777669_mergedPeaks.15443_MBD2_26243_POLI_<br>18447         | -<br>3.0807<br>34967 | 0.0005<br>03819 | 0.0202<br>19715 |
| chr20:30467391-<br>30468107_mergedPeaks.20647_TTLL9_9245_PDRG1<br>_72134        | 2.1467<br>51907      | 0.0005<br>04448 | 0.0202<br>19715 |
| chr9:132650649-<br>132651297_mergedPeaks.38247_MIR6855_19090_F<br>NBP1_154500   | 1.3157<br>82311      | 0.0005<br>04855 | 0.0202<br>19715 |
| chr14:105282064-<br>105282669_mergedPeaks.11554_ZBTB42_15434_LI<br>NC00638_5171 | 1.8121<br>5303       | 0.0005<br>05542 | 0.0202<br>19715 |
| chrX:118149442-<br>118150072_mergedPeaks.39399_LONRF3_41181_KI<br>AA1210_134785 | -<br>2.4364<br>7817  | 0.0005<br>05693 | 0.0202<br>19715 |
| chr5:150826855-<br>150827331_mergedPeaks.29405_SLC36A2_99942_SL<br>C36A1_69     | 1.7797<br>004        | 0.0005<br>07195 | 0.0202<br>27398 |
| chr2:157389487-<br>157389864_mergedPeaks.18850_GPD2_96776_GALN<br>T5_724664     | 6.4224<br>77611      | 0.0005<br>07509 | 0.0202<br>27398 |
| chr2:39322045-<br>39322594_mergedPeaks.17312_LOC375196_134834<br>_SOS1_25285    | 6.4401<br>78243      | 0.0005<br>07905 | 0.0202<br>27398 |
| chr2:201753561-<br>201754377_mergedPeaks.19601_PPIL3_120_NIF3L1<br>_138         | 1.7352<br>10367      | 0.0005<br>0807  | 0.0202<br>27398 |
| chr3:43732003-<br>43733031_mergedPeaks.22409_ABHD5_143_MIR138<br>-1_423186      | 1.0515<br>50723      | 0.0005<br>13759 | 0.0203<br>70512 |
| chr11:61734673-<br>61735422_mergedPeaks.6269_BEST1_17692_FTH1_<br>85            | 1.1898<br>61034      | 0.0005<br>15643 | 0.0204<br>16542 |
| chr7:142985003-<br>142985722_mergedPeaks.34635_TMEN139_3371_C<br>ASP2_1318      | 1.1050<br>99744      | 0.0005<br>15996 | 0.0204<br>16542 |
| chr1:238162814-<br>238163375_mergedPeaks.3408_ZP4_108872_LINC01                 | 6.5759<br>19672      | 0.0005<br>17487 | 0.0204<br>26947 |

|                                                                                    |                      |                 |                 |
|------------------------------------------------------------------------------------|----------------------|-----------------|-----------------|
| 139_486223                                                                         |                      |                 |                 |
| chr1:154531070-<br>154531708_mergedPeaks.1826_UBE2Q1_269_CHRN<br>B2_8867           | 1.1479<br>68347      | 0.0005<br>1783  | 0.0204<br>26947 |
| chr11:59436282-<br>59437146_mergedPeaks.6229_PATL1_203_OR10V1_<br>44604            | 1.1804<br>23711      | 0.0005<br>17936 | 0.0204<br>26947 |
| chr10:31607112-<br>31608542_mergedPeaks.4106_ZNF438_286961_ZEB<br>1-AS1_197        | 1.0306<br>83408      | 0.0005<br>18412 | 0.0204<br>26947 |
| chr8:54674131-<br>54674664_mergedPeaks.35383_OPRK1_510140_ATP<br>6V1H_81474        | 6.5526<br>0268       | 0.0005<br>2139  | 0.0205<br>22962 |
| chr2:148601655-<br>148602328_mergedPeaks.18695_PABPC1P2_125736<br>7_ACVR2A_94      | 1.8629<br>89803      | 0.0005<br>22026 | 0.0205<br>26704 |
| chr1:182572971-<br>182573872_mergedPeaks.2392_RNASEL_15027_RGS<br>16_127           | 1.1461<br>29595      | 0.0005<br>23283 | 0.0205<br>54845 |
| chr7:37826308-<br>37827194_mergedPeaks.33191_GPR141_46756_NME<br>8_61447           | -<br>1.7316<br>99124 | 0.0005<br>25064 | 0.0206<br>03485 |
| chr1:76960450-<br>76960836_mergedPeaks.983_ST6GALNAC3_420255_<br>ST6GALNAC5_372542 | 6.5698<br>87051      | 0.0005<br>25988 | 0.0206<br>18395 |
| chr6:24992099-<br>24992352_mergedPeaks.30318_FAM65B_114632_C<br>MAHP_145826        | 6.5072<br>08819      | 0.0005<br>33095 | 0.0208<br>75443 |
| chr2:74709868-<br>74710570_mergedPeaks.17836_TTC31_20_CCDC142<br>_138              | 1.8374<br>39504      | 0.0005<br>35055 | 0.0208<br>95814 |
| chr1:154955492-<br>154955916_mergedPeaks.1841_MIR4258_7536_FLA<br>D1_65            | 1.7118<br>30281      | 0.0005<br>35268 | 0.0208<br>95814 |
| chr18:60860087-<br>60860428_mergedPeaks.15598_PHLPP1_477586_BC<br>L2_126356        | 6.5882<br>65301      | 0.0005<br>38424 | 0.0209<br>97446 |
| chr7:45047541-<br>45047788_mergedPeaks.33303_CCM2_8320_NACAD_<br>80829             | 6.5697<br>74424      | 0.0005<br>3932  | 0.0210<br>10767 |
| chr11:62358920-<br>62359495_mergedPeaks.6275_TUT1_98_MTA2_1010<br>5                | 1.6069<br>09488      | 0.0005<br>40702 | 0.0210<br>21455 |
| chr15:60770962-<br>60771600_mergedPeaks.11963_ANXA2_81096_NAR                      | 1.1780<br>51823      | 0.0005<br>41833 | 0.0210<br>43881 |

|                                                                              |                      |                 |                 |
|------------------------------------------------------------------------------|----------------------|-----------------|-----------------|
| G2_78                                                                        |                      |                 |                 |
| chr15:93168487-93169241_mergedPeaks.12400_LINC00930_53371_FAM174B_30167      | 3.0607<br>13213      | 0.0005<br>43928 | 0.0211<br>03613 |
| chr11:67572685-67573673_mergedPeaks.6428_FAM86C2P_372_UNC93B1_198416         | 1.4364<br>72884      | 0.0005<br>45559 | 0.0211<br>45273 |
| chr13:66080130-66080443_mergedPeaks.9857_LINC00395_1768135_PCDH9-AS2_1319014 | 6.4270<br>81028      | 0.0005<br>47334 | 0.0211<br>71235 |
| chr15:65133499-65134267_mergedPeaks.12023_PIF1_16016_PLEKH02_198             | 1.5035<br>88875      | 0.0005<br>47667 | 0.0211<br>71235 |
| chr11:132227571-132228701_mergedPeaks.7353_NTM-IT_73941_OPCML_584901         | -<br>1.1545<br>17141 | 0.0005<br>47902 | 0.0211<br>71235 |
| chr5:153608151-153608791_mergedPeaks.29445_GALNT10_38177_SAP30L-AS1_216911   | -<br>3.9728<br>07971 | 0.0005<br>49331 | 0.0212<br>04836 |
| chr12:8763727-8764241_mergedPeaks.7471_CLEC4E_70426_AICDA_1458               | 6.5309<br>37725      | 0.0005<br>51685 | 0.0212<br>74065 |
| chr12:42491796-42492256_mergedPeaks.7932_PDZRN4_909777_GXYLT1_46647          | 6.4908<br>05801      | 0.0005<br>54051 | 0.0213<br>21969 |
| chrX:48900838-48901529_mergedPeaks.38899_TFE3_140_CCDC120_9777               | 1.1561<br>58589      | 0.0005<br>55716 | 0.0213<br>45281 |
| chr15:62352035-62352326_mergedPeaks.11979_RORA_1467473_VPS13C_484            | 2.8991<br>64578      | 0.0005<br>55782 | 0.0213<br>45281 |
| chr6:154619505-154619843_mergedPeaks.32346_OPRM1_212033_IPCEF1_58226         | 6.4419<br>04929      | 0.0005<br>56948 | 0.0213<br>68432 |
| chr9:75748801-75749190_mergedPeaks.37510_ALDH1A1_180762_A_NXA1_17785         | 6.3431<br>0486       | 0.0005<br>57912 | 0.0213<br>83817 |
| chr3:15386782-15387550_mergedPeaks.21953_SH3BP5_4265_METTL6_81876            | 2.5187<br>73273      | 0.0005<br>61152 | 0.0214<br>86279 |
| chr1:224390962-224391232_mergedPeaks.3126_DEGS1_20188_LOC101927143_9884      | 6.4272<br>17932      | 0.0005<br>62255 | 0.0215<br>06817 |
| chr15:82339176-82339751_mergedPeaks.12251_MEX3B_979_EFTUD                    | 1.4413<br>01335      | 0.0005<br>63814 | 0.0215<br>24098 |



|                                                                                     |                      |                 |                 |
|-------------------------------------------------------------------------------------|----------------------|-----------------|-----------------|
| 1_215641                                                                            |                      |                 |                 |
| chr6:122744011-<br>122744394_mergedPeaks.31748_HSF2_23507_SERIN<br>C1_48750         | 6.4136<br>02194      | 0.0005<br>64976 | 0.0215<br>24098 |
| chr7:76022317-<br>76022794_mergedPeaks.33552_YWHAG_34213_ZP3_<br>4285               | 2.3967<br>06341      | 0.0005<br>67079 | 0.0215<br>82553 |
| chr6:5260635-<br>5261898_mergedPeaks.29971_LYRM4_83_FARS2_31<br>7                   | 1.0989<br>84192      | 0.0005<br>68776 | 0.0216<br>2547  |
| chr8:90416007-<br>90416385_mergedPeaks.35951_MMP16_1076479_RI<br>PK2_353778         | -<br>2.5736<br>96099 | 0.0005<br>70231 | 0.0216<br>59056 |
| chr5:120363404-<br>120363722_mergedPeaks.28849_PRR16_563545_LO<br>C102467226_294681 | -<br>2.9636<br>96362 | 0.0005<br>72515 | 0.0216<br>97805 |
| chr6:37400768-<br>37401244_mergedPeaks.30574_CMTR1_100_CCDC16<br>7_66694            | 1.5039<br>50656      | 0.0005<br>72834 | 0.0216<br>97805 |
| chr6:97355337-<br>97355851_mergedPeaks.31355_NDUFAF4_9827_KLH<br>L32_16901          | 6.5314<br>96435      | 0.0005<br>72966 | 0.0216<br>97805 |
| chr17:16311269-<br>16312073_mergedPeaks.14062_UBB_27068_TRPV2_<br>7184              | 1.4344<br>03485      | 0.0005<br>73614 | 0.0217<br>00678 |
| chr20:30946573-<br>30946937_mergedPeaks.20658_ASXL1_609_LOC101<br>929698_151006     | 2.5592<br>84955      | 0.0005<br>75886 | 0.0217<br>37085 |
| chr9:68726145-<br>68726743_mergedPeaks.37417_LOC642236_272069<br>_LOC100132352_96   | 1.3673<br>2067       | 0.0005<br>76234 | 0.0217<br>37085 |
| chr11:108491586-<br>108492739_mergedPeaks.6959_EXPH5_27788_DDX1<br>0_43589          | 1.8915<br>79661      | 0.0005<br>76295 | 0.0217<br>37085 |
| chr1:68214234-<br>68214681_mergedPeaks.874_GADD45A_63598_GNG<br>12-AS1_83513        | 6.3404<br>32698      | 0.0005<br>79424 | 0.0218<br>33397 |
| chr1:50992979-<br>50993485_mergedPeaks.630_DMRTA2_104113_FAF<br>1_432704            | 6.3342<br>61763      | 0.0005<br>80999 | 0.0218<br>67959 |
| chr7:74072505-<br>74073101_mergedPeaks.33531_GTF2I_813_LOC1019<br>26943_70453       | 1.1340<br>17167      | 0.0005<br>81493 | 0.0218<br>67959 |
| chr16:2390486-<br>2391127_mergedPeaks.12610_ABCA3_59_ABCA17P_<br>7                  | 1.3796<br>02322      | 0.0005<br>8457  | 0.0219<br>27062 |

|                                                                                    |                      |                 |                 |
|------------------------------------------------------------------------------------|----------------------|-----------------|-----------------|
| 116                                                                                |                      |                 |                 |
| chr12:15103419-<br>15103764_mergedPeaks.7604_ERP27_12128_ARHGD<br>IB_10971         | 3.6029<br>11117      | 0.0005<br>84799 | 0.0219<br>27062 |
| chr7:14788187-<br>14788556_mergedPeaks.32823_ETV1_758729_DGKB<br>_92704            | 6.4088<br>14636      | 0.0005<br>89631 | 0.0220<br>50027 |
| chr11:18417506-<br>18418025_mergedPeaks.5769_LDHA_1830_LDHC_16<br>087              | 1.4668<br>6897       | 0.0005<br>8991  | 0.0220<br>50027 |
| chr22:36924923-<br>36925759_mergedPeaks.21514_EIF3D_64_CACNG2_1<br>73349           | 1.0624<br>9137       | 0.0005<br>91586 | 0.0220<br>50027 |
| chrX:135067330-<br>135067808_mergedPeaks.39599_MMGT1_11435_SLC<br>9A6_16           | 6.4794<br>98225      | 0.0005<br>91796 | 0.0220<br>50027 |
| chr6:47683436-<br>47683874_mergedPeaks.30711_GPR115_17367_OPN<br>5_66119           | 6.5319<br>73304      | 0.0005<br>92154 | 0.0220<br>50027 |
| chr1:146713979-<br>146715035_mergedPeaks.1706_CHD1L_217_LINC00<br>624_275192       | 1.2006<br>99656      | 0.0005<br>92738 | 0.0220<br>50027 |
| chr14:101106784-<br>101107078_mergedPeaks.11504_BEGAIN_72524_LIN<br>C00523_16673   | 6.6257<br>88852      | 0.0005<br>93069 | 0.0220<br>50027 |
| chr15:97104771-<br>97105173_mergedPeaks.12463_MIR1469_228483_S<br>PATA8-AS1_219912 | -<br>2.9658<br>84573 | 0.0005<br>93308 | 0.0220<br>50027 |
| chr4:39460287-<br>39460887_mergedPeaks.25161_RPL9_380_LIAS_56                      | 1.5674<br>10104      | 0.0005<br>96436 | 0.0221<br>0135  |
| chr11:33795830-<br>33796400_mergedPeaks.5982_FBXO3_44_LMO2_117<br>721              | 1.8124<br>77178      | 0.0005<br>97914 | 0.0221<br>27417 |
| chr9:139304759-<br>139305221_mergedPeaks.38309_SNAPC4_12101_PM<br>PCA_34           | 3.0727<br>94755      | 0.0006<br>04296 | 0.0223<br>05454 |
| chr14:95982275-<br>95982695_mergedPeaks.11457_SYNE3_40312_SCAR<br>NA13_17481       | 2.6522<br>49653      | 0.0006<br>0595  | 0.0223<br>23075 |
| chr10:49514298-<br>49515155_mergedPeaks.4258_FRMPD2_131540_MA<br>PK8_94928         | 1.2155<br>16169      | 0.0006<br>09825 | 0.0224<br>22292 |
| chr4:59627643-<br>59628012_mergedPeaks.25395_IGFBP7_1651276_LP<br>HN3_2735011      | 6.5075<br>20305      | 0.0006<br>12191 | 0.0224<br>87499 |

|                                                                                       |                 |                 |                 |
|---------------------------------------------------------------------------------------|-----------------|-----------------|-----------------|
| chr1:178062588-<br>178062998_mergedPeaks.2300_LOC730102_55651_<br>RASAL2-AS1_335      | 6.4436<br>37662 | 0.0006<br>14382 | 0.0225<br>10348 |
| chr10:103329911-<br>103330210_mergedPeaks.5025_BTRC_216271_POLL<br>_17967             | 3.7040<br>87162 | 0.0006<br>14454 | 0.0225<br>10348 |
| chr5:35058453-<br>35058964_mergedPeaks.27624_AGXT2_10468_PRLR<br>_59516               | 6.3309<br>14172 | 0.0006<br>1464  | 0.0225<br>10348 |
| chr2:70417372-<br>70418407_mergedPeaks.17769_LOC100133985_654<br>41_C2orf42_262       | 1.3400<br>99159 | 0.0006<br>16231 | 0.0225<br>10348 |
| chr5:148211267-<br>148211851_mergedPeaks.29337_ADRB2_5404_SH3T<br>C2_231178           | 6.4276<br>72348 | 0.0006<br>1658  | 0.0225<br>10348 |
| chr3:102886577-<br>102887057_mergedPeaks.23137_ZPLD1_732959_MI<br>R548A3_1059288      | 6.3341<br>30908 | 0.0006<br>17598 | 0.0225<br>10348 |
| chr10:23003231-<br>23003807_mergedPeaks.3978_PIP4K2A_16_ARMC3_<br>213433              | 1.8967<br>82012 | 0.0006<br>17763 | 0.0225<br>10348 |
| chr22:38073185-<br>38073500_mergedPeaks.21531_LGALS1_1730_NOL1<br>2_9001              | 2.6760<br>55233 | 0.0006<br>18152 | 0.0225<br>10348 |
| chr19:46405781-<br>46406550_mergedPeaks.16559_MYPOP_303_NANOS<br>2_11871              | 1.2176<br>94465 | 0.0006<br>20482 | 0.0225<br>73544 |
| chr20:46115913-<br>46116623_mergedPeaks.20829_ZMYND8_130635_N<br>COA3_14332           | 2.0366<br>90016 | 0.0006<br>22135 | 0.0226<br>05488 |
| chr22:31364850-<br>31365595_mergedPeaks.21470_TUG1_26_SMTN_115<br>759                 | 1.2308<br>733   | 0.0006<br>24353 | 0.0226<br>27577 |
| chr16:70099586-<br>70100250_mergedPeaks.13436_PDXDC2P_67_PDPR_<br>47610               | 1.5775<br>54106 | 0.0006<br>29672 | 0.0227<br>76839 |
| chr1:150551758-<br>150552459_mergedPeaks.1749_ADAMTSL4-<br>AS1_5080_MCL1_106          | 1.0987<br>32829 | 0.0006<br>33453 | 0.0228<br>70021 |
| chr5:1523925-<br>1524443_mergedPeaks.27325_LPCAT1_108_SDHAP3<br>_70462                | 1.7317<br>04415 | 0.0006<br>39264 | 0.0230<br>57846 |
| chr9:120406705-<br>120407204_mergedPeaks.38061_SNORA70C_463474<br>_RP11-500B12.1_3929 | 6.3340<br>54632 | 0.0006<br>40626 | 0.0230<br>85032 |

|                                                                                   |                 |                 |                 |
|-----------------------------------------------------------------------------------|-----------------|-----------------|-----------------|
| chr12:56360271-<br>56360693_mergedPeaks.8156_DGKA_34671_PMEL_1<br>4               | 2.5786<br>25388 | 0.0006<br>4413  | 0.0231<br>89296 |
| chr17:37617972-<br>37618225_mergedPeaks.14276_CDK12_335_NEURO<br>D2_146077        | 6.6385<br>17595 | 0.0006<br>45439 | 0.0232<br>09035 |
| chr1:101901566-<br>101902177_mergedPeaks.1407_RNU6-<br>31P_95420_OLFM3_410765     | 6.4077<br>58321 | 0.0006<br>45902 | 0.0232<br>09035 |
| chr1:53308231-<br>53308679_mergedPeaks.661_ZYG11A_273_ECHDC2_<br>78991            | 2.1034<br>93767 | 0.0006<br>46793 | 0.0232<br>16486 |
| chr1:234735515-<br>234736219_mergedPeaks.3325_RP5-<br>855F14.1_68342_IRF2BP2_9404 | 1.0712<br>29769 | 0.0006<br>50134 | 0.0232<br>94951 |
| chr16:56643490-<br>56643759_mergedPeaks.13200_MT2A_1147_MT1L_7<br>748             | 6.4279<br>73971 | 0.0006<br>57256 | 0.0235<br>17382 |
| chr2:146402312-<br>146402891_mergedPeaks.18663_TEX41_977068_PA<br>BPC1P2_942023   | 3.4196<br>41802 | 0.0006<br>57582 | 0.0235<br>17382 |
| chr17:76778243-<br>76778829_mergedPeaks.14837_CYTH1_160_USP36_<br>58433           | 1.4282<br>78796 | 0.0006<br>58696 | 0.0235<br>35034 |
| chr1:154974340-<br>154974953_mergedPeaks.1843_LENEP_8585_ZBTB7<br>B_459           | 1.4802<br>91173 | 0.0006<br>59561 | 0.0235<br>43791 |
| chr4:110354454-<br>110355215_mergedPeaks.26064_COL25A1_131035_<br>SEC24B_136      | 1.1016<br>3934  | 0.0006<br>61993 | 0.0236<br>08379 |
| chr1:28099265-<br>28099939_mergedPeaks.349_FAM76A_47113_STX12<br>_91              | 1.1447<br>45705 | 0.0006<br>64447 | 0.0236<br>73657 |
| chr2:157918282-<br>157918778_mergedPeaks.18856_GPD2_625631_GAL<br>NT5_195809      | 3.4196<br>11159 | 0.0006<br>65895 | 0.0237<br>02978 |
| chr2:28615376-<br>28615924_mergedPeaks.17169_AC093690.1_82324_<br>FOSL2_128       | 2.0008<br>74806 | 0.0006<br>6891  | 0.0237<br>65724 |
| chr3:39425556-<br>39426075_mergedPeaks.22355_SLC25A38_1001_RP<br>SA_23295         | 1.2949<br>41266 | 0.0006<br>77645 | 0.0240<br>53562 |
| chr16:278929-<br>279567_mergedPeaks.12553_HBQ1_48916_LUC7L_2<br>01                | 2.6904<br>50581 | 0.0006<br>87554 | 0.0242<br>91662 |

|                                                                                   |                 |                 |                 |
|-----------------------------------------------------------------------------------|-----------------|-----------------|-----------------|
| chr22:19842159-<br>19842770_mergedPeaks.21372_GNB1L_2_COMT_867<br>98              | 1.4450<br>28336 | 0.0006<br>89557 | 0.0243<br>39744 |
| chr17:21117267-<br>21118188_mergedPeaks.14126_DHRS7B_87487_TM<br>EM11_181         | 1.0852<br>86161 | 0.0006<br>94528 | 0.0244<br>46992 |
| chr19:50372611-<br>50373245_mergedPeaks.16639_PNKP_2106_AKT1S1<br>_7716           | 1.0515<br>29749 | 0.0006<br>9837  | 0.0245<br>53283 |
| chr10:30722606-<br>30723605_mergedPeaks.4088_MAP3K8_156_LYZL2_<br>195542          | 1.1300<br>14181 | 0.0007<br>00691 | 0.0245<br>95486 |
| chr18:74086748-<br>74087100_mergedPeaks.15739_LOC339298_251972<br>_ZNF516_120222  | 6.4227<br>05561 | 0.0007<br>01828 | 0.0246<br>12623 |
| chr1:27153004-<br>27153450_mergedPeaks.327_ZDHHC18_27_SFN_364<br>05               | 2.5982<br>14092 | 0.0007<br>04567 | 0.0246<br>71731 |
| chr4:57843577-<br>57844468_mergedPeaks.25383_NOA1_196_POLR2B_<br>1086             | 1.0221<br>77098 | 0.0007<br>0988  | 0.0247<br>01889 |
| chr10:45470475-<br>45470774_mergedPeaks.4228_RASSF4_15406_C10or<br>f10_3706       | 2.8910<br>76323 | 0.0007<br>10001 | 0.0247<br>01889 |
| chr11:65405420-<br>65405748_mergedPeaks.6367_MIR4690_1804_SIPA1<br>_2007          | 3.3410<br>00912 | 0.0007<br>10739 | 0.0247<br>01889 |
| chr10:80062761-<br>80063508_mergedPeaks.4681_LINC00595_36050_Z<br>MIZ1-AS1_764071 | 1.1483<br>55306 | 0.0007<br>108   | 0.0247<br>01889 |
| chr1:112938641-<br>112939065_mergedPeaks.1539_CTTNBP2NL_54_MIR<br>4256_65602      | 1.8562<br>74436 | 0.0007<br>11444 | 0.0247<br>01889 |
| chr20:39762529-<br>39762990_mergedPeaks.20757_TOP1_105298_PLCG<br>1_3401          | 1.5516<br>34641 | 0.0007<br>12615 | 0.0247<br>01889 |
| chr7:65235552-<br>65236273_mergedPeaks.33435_SNORA22_15400_VK<br>ORC1L1_102344    | 1.2810<br>57726 | 0.0007<br>13041 | 0.0247<br>01889 |
| chr12:14518249-<br>14519030_mergedPeaks.7582_ATF7IP_74_PLBD1_20<br>2152           | 1.3963<br>67055 | 0.0007<br>14141 | 0.0247<br>01889 |
| chr17:69846567-<br>69847325_mergedPeaks.14701_CASC17_648626_AC<br>005152.3_175174 | 6.3380<br>21436 | 0.0007<br>14495 | 0.0247<br>01889 |

|                                                                           |                      |                 |                 |
|---------------------------------------------------------------------------|----------------------|-----------------|-----------------|
| chr12:56320611-<br>56321198_mergedPeaks.8151_MMP19_84137_WIBG_793         | 1.1832<br>82147      | 0.0007<br>14829 | 0.0247<br>01889 |
| chr1:234745825-<br>234746216_mergedPeaks.3326_IRF2BP2_749_LINC00184_19036 | 1.8998<br>66129      | 0.0007<br>15052 | 0.0247<br>01889 |
| chr14:31495419-<br>31496080_mergedPeaks.10626_STRN3_142_HECTD1_180940     | 1.2575<br>91124      | 0.0007<br>15365 | 0.0247<br>01889 |
| chr14:25602015-<br>25602276_mergedPeaks.10604_STXBP6_83050_NOV_A1_1464815 | 6.5619<br>21288      | 0.0007<br>1544  | 0.0247<br>01889 |
| chr12:120907227-<br>120907839_mergedPeaks.9147_GATC_23293_SRSF9_25        | 1.9760<br>37723      | 0.0007<br>19488 | 0.0248<br>19068 |
| chr7:44621546-<br>44622229_mergedPeaks.33287_TMED4_60_OGDH_2_4233         | 1.1248<br>8647       | 0.0007<br>21101 | 0.0248<br>52107 |
| chr12:105629797-<br>105630226_mergedPeaks.8965_APPL2_2828_C12orf75_94402  | 2.3327<br>92982      | 0.0007<br>3196  | 0.0252<br>03459 |
| chr15:45694299-<br>45694957_mergedPeaks.11807_SPATA5L1_110_C15orf48_28098 | 1.9056<br>52833      | 0.0007<br>34013 | 0.0252<br>51231 |
| chr4:113218169-<br>113218629_mergedPeaks.26132_TIFA_11340_ALPK1_99        | -<br>3.7917<br>15887 | 0.0007<br>35113 | 0.0252<br>66188 |
| chr9:102669212-<br>102669537_mergedPeaks.37814_STX17_460_ERP44_191956     | 3.6043<br>6968       | 0.0007<br>36221 | 0.0252<br>8136  |
| chr19:13262472-<br>13262949_mergedPeaks.16085_IER2_1429_CACNA1A_354564    | 1.2696<br>26956      | 0.0007<br>38464 | 0.0253<br>35469 |
| chr1:111991645-<br>111992261_mergedPeaks.1529_WDR77_123_C1orf162_24650    | 1.3514<br>57899      | 0.0007<br>45086 | 0.0255<br>16513 |
| chr2:70475331-<br>70476033_mergedPeaks.17770_C2orf42_57531_TIA1_97        | 1.3634<br>22934      | 0.0007<br>45946 | 0.0255<br>22938 |
| chr17:73178695-<br>73179433_mergedPeaks.14762_HN1_28286_SUMO2_34          | 1.2272<br>34266      | 0.0007<br>47566 | 0.0255<br>51493 |
| chr14:52118095-<br>52119014_mergedPeaks.10848_FRMD6-AS1_92_FRMD6_65446    | 1.1094<br>7733       | 0.0007<br>49297 | 0.0255<br>68403 |

|                                                                                  |                 |                 |                 |
|----------------------------------------------------------------------------------|-----------------|-----------------|-----------------|
| chr20:50807880-<br>50808672_mergedPeaks.20893_RP5-<br>1112F19.2_328824_ZFP64_248 | 1.6851<br>07849 | 0.0007<br>50049 | 0.0255<br>71061 |
| chr11:27340521-<br>27341030_mergedPeaks.5896_BBOX1_278267_CCDC<br>34_44020       | 6.4007<br>14674 | 0.0007<br>5698  | 0.0257<br>25809 |
| chr4:2845275-<br>2845847_mergedPeaks.24729_SH3BP2_50812_ADD1<br>_315             | 1.3637<br>98701 | 0.0007<br>58994 | 0.0257<br>44569 |
| chr6:73092330-<br>73093207_mergedPeaks.30995_RIMS1_16337_KCNQ<br>5_238802        | 2.8600<br>39031 | 0.0007<br>59209 | 0.0257<br>44569 |
| chr16:10870161-<br>10870487_mergedPeaks.12725_NUBP1_32682_TVP2<br>3A_42297       | 6.3382<br>27363 | 0.0007<br>61315 | 0.0257<br>69949 |
| chr1:192672921-<br>192673242_mergedPeaks.2544_RGS13_67814_RGS2_<br>105087        | 6.3293<br>30805 | 0.0007<br>64023 | 0.0258<br>38564 |
| chr10:103453945-<br>103454194_mergedPeaks.5027_MIR3158-<br>2_92815_FBXW4_674     | 3.9183<br>90125 | 0.0007<br>67456 | 0.0259<br>31526 |
| chr1:167191142-<br>167191781_mergedPeaks.2085_POU2F1_1339_CD24<br>7_296386       | 2.0137<br>25241 | 0.0007<br>7028  | 0.0259<br>80676 |
| chr15:91235311-<br>91235981_mergedPeaks.12371_CRTC3_162529_BLM<br>_24911         | 6.4347<br>41142 | 0.0007<br>70985 | 0.0259<br>81374 |
| chr17:62023843-<br>62024271_mergedPeaks.14594_CD79B_14353_SCN4<br>A_26221        | 2.8120<br>98436 | 0.0007<br>75131 | 0.0260<br>81194 |
| chr1:91966259-<br>91966811_mergedPeaks.1218_HFM1_96109_CDC7_1<br>29              | 1.7688<br>80363 | 0.0007<br>75645 | 0.0260<br>81194 |
| chr18:35109846-<br>35110355_mergedPeaks.15270_TPGS2_700921_CEL<br>F4_35900       | 6.3530<br>73799 | 0.0007<br>76009 | 0.0260<br>81194 |
| chr1:227102851-<br>227103257_mergedPeaks.3201_PSEN2_44782_ADCK<br>3_24883        | 6.4112<br>65329 | 0.0007<br>79434 | 0.0261<br>52072 |
| chr9:111696191-<br>111696976_mergedPeaks.37922_ACTL7A_72076_IK<br>BKAP_25        | 1.1522<br>93079 | 0.0007<br>79496 | 0.0261<br>52072 |
| chr16:71598661-<br>71599640_mergedPeaks.13463_CHST4_38997_RP11-<br>432I5.1_541   | 1.0698<br>72436 | 0.0007<br>82306 | 0.0261<br>74155 |

|                                                                                    |                      |                 |                 |
|------------------------------------------------------------------------------------|----------------------|-----------------|-----------------|
| chr8:10368933-<br>10369319_mergedPeaks.34906_MSRA_416061_PRSS<br>55_13929          | 6.4820<br>91169      | 0.0007<br>82564 | 0.0261<br>74155 |
| chr3:2384866-<br>2385369_mergedPeaks.21719_CNTN4-<br>AS2_199192_CNTN4_548781       | 2.4719<br>63334      | 0.0007<br>82914 | 0.0261<br>74155 |
| chr6:39082307-<br>39083038_mergedPeaks.30587_GLP1R_66116_SAYS<br>D1_193            | 1.1755<br>49354      | 0.0007<br>84929 | 0.0262<br>18432 |
| chr6:64283316-<br>64283849_mergedPeaks.30901_PTP4A1_1666_PHF3<br>_72848            | 1.6341<br>50985      | 0.0007<br>906   | 0.0263<br>70463 |
| chr11:32830835-<br>32831113_mergedPeaks.5967_CCDC73_14770_PRRG<br>4_20506          | -<br>5.9593<br>17135 | 0.0007<br>91279 | 0.0263<br>70463 |
| chr22:27068424-<br>27069196_mergedPeaks.21434_LOC102724827_5_R<br>P1-90L6.2_230444 | 1.3041<br>2115       | 0.0007<br>91566 | 0.0263<br>70463 |
| chr4:151936252-<br>151937199_mergedPeaks.26684_LRBA_76_RPS3A_8<br>3999             | 1.1088<br>48578      | 0.0007<br>9671  | 0.0264<br>95321 |
| chr4:122121139-<br>122121732_mergedPeaks.26266_NDNF_127762_TNI<br>P3_16347         | 3.3581<br>15887      | 0.0007<br>99881 | 0.0265<br>77496 |
| chr10:79471076-<br>79471469_mergedPeaks.4674_KCNMA1_73695_DLG<br>5_215076          | 6.3998<br>52235      | 0.0008<br>04729 | 0.0266<br>72841 |
| chr21:26882227-<br>26882694_mergedPeaks.21109_LINC00158_78447_<br>MIR155HG_51996   | 6.3384<br>04395      | 0.0008<br>05563 | 0.0266<br>72841 |
| chr16:11457120-<br>11457481_mergedPeaks.12757_RMI2_17990_LOC10<br>1927131_101815   | 6.3384<br>13164      | 0.0008<br>07859 | 0.0266<br>95508 |
| chr12:25204629-<br>25205678_mergedPeaks.7728_C12orf77_54780_LRM<br>P_27            | 1.2095<br>60212      | 0.0008<br>08038 | 0.0266<br>95508 |
| chr6:24494952-<br>24496019_mergedPeaks.30302_ALDH5A1_289_KIAA<br>0319_87970        | 1.8217<br>24507      | 0.0008<br>08358 | 0.0266<br>95508 |
| chr3:128598072-<br>128598614_mergedPeaks.23550_ACAD9_11_KIAA12<br>57_114643        | 1.5428<br>19316      | 0.0008<br>10159 | 0.0267<br>31723 |
| chr12:125051931-<br>125052478_mergedPeaks.9227_NCOR2_194_SCARB1<br>_296315         | 1.7844<br>47253      | 0.0008<br>14379 | 0.0268<br>24332 |



|                                                                                    |                      |                 |                 |
|------------------------------------------------------------------------------------|----------------------|-----------------|-----------------|
| chr1:15438707-<br>15439051_mergedPeaks.182_KAZN_188255_TM<br>MEM51-AS1_40081       | 6.6448<br>34385      | 0.0008<br>15622 | 0.0268<br>41946 |
| chr16:76818416-<br>76818869_mergedPeaks.13577_RP11-<br>96P7.1_149748_MIR4719_84190 | 6.3198<br>91493      | 0.0008<br>18043 | 0.0268<br>98306 |
| chr16:4321870-4322194_mergedPeaks.12657_RP11-<br>95P2.1_18242_TFAP4_969            | 3.5751<br>73807      | 0.0008<br>20663 | 0.0269<br>61078 |
| chr1:1334577-<br>1335122_mergedPeaks.18_CCNL2_131_LOC148413_<br>60                 | 1.6300<br>68172      | 0.0008<br>27477 | 0.0271<br>37943 |
| chr13:76534611-<br>76535245_mergedPeaks.9974_C13orf45_89755_KCT<br>D12_925612      | 2.7606<br>93673      | 0.0008<br>29414 | 0.0271<br>78001 |
| chr17:56084415-<br>56085301_mergedPeaks.14527_SRSF1_151_RP11-<br>159D12.10_75707   | 1.2455<br>69452      | 0.0008<br>30396 | 0.0271<br>86703 |
| chr3:13009065-<br>13009659_mergedPeaks.21907_RPL32_126281_IQSE<br>C1_105255        | 1.3775<br>55859      | 0.0008<br>31353 | 0.0271<br>94551 |
| chr4:116193390-<br>116194092_mergedPeaks.26193_NDST4_158709_MI<br>R1973_1027139    | 6.4290<br>06158      | 0.0008<br>32879 | 0.0272<br>21012 |
| chr11:5521701-<br>5522125_mergedPeaks.5543_OR52D1_11999_OR51B<br>5_4969            | -<br>2.3550<br>65607 | 0.0008<br>35409 | 0.0272<br>80194 |
| chr16:66914067-<br>66914718_mergedPeaks.13334_PDP2_10_CDH16_38<br>495              | 1.2123<br>87522      | 0.0008<br>40986 | 0.0274<br>38702 |
| chr2:158325387-<br>158326311_mergedPeaks.18878_CYTIP_25245_ACV<br>R1C_128223       | 1.3187<br>76701      | 0.0008<br>462   | 0.0275<br>62696 |
| chr15:102264162-<br>102264955_mergedPeaks.12546_TM2D3_71964_TA<br>RSL2_87          | 1.3777<br>5852       | 0.0008<br>46761 | 0.0275<br>62696 |
| chr3:84783978-<br>84784254_mergedPeaks.22926_GBE1_2973166_LIN<br>C00971_134610     | -<br>5.9488<br>76101 | 0.0008<br>46965 | 0.0275<br>62696 |
| chr1:45285004-<br>45285831_mergedPeaks.578_BTBD19_11264_PTCH2<br>_23199            | 1.7944<br>19582      | 0.0008<br>52831 | 0.0277<br>0607  |
| chr19:55574373-<br>55574807_mergedPeaks.16716_GP6_24958_RDH13_<br>6324             | 1.6223<br>93901      | 0.0008<br>65472 | 0.0280<br>44685 |
| chrX:154254853-                                                                    | 1.3235               | 0.0008          | 0.0280          |

|                                                                                   |                      |                 |                 |
|-----------------------------------------------------------------------------------|----------------------|-----------------|-----------------|
| 154255744_mergedPeaks.39750_FUNDC2_235_MTC<br>P1_44249                            | 43963                | 66619           | 57893           |
| chr8:60873003-<br>60873378_mergedPeaks.35483_TOX_841423_CA8_3<br>20764            | 3.4227<br>20757      | 0.0008<br>68386 | 0.0280<br>66137 |
| chr3:162216425-<br>162216931_mergedPeaks.24067_OTOL1_1002083_LI<br>NC01192_804411 | 6.5152<br>52771      | 0.0008<br>68819 | 0.0280<br>66137 |
| chr15:82578737-<br>82579381_mergedPeaks.12256_FAM154B_23908_AD<br>AMTS7P1_6561    | 6.3494<br>30519      | 0.0008<br>69092 | 0.0280<br>66137 |
| chr2:191208842-<br>191209161_mergedPeaks.19373_INPP1_806_MFSD6<br>_64079          | 6.3334<br>70229      | 0.0008<br>72035 | 0.0281<br>20311 |
| chr19:6199486-<br>6199969_mergedPeaks.15931_ACSBG2_64084_MLLT<br>1_80232          | 1.5067<br>08458      | 0.0008<br>72252 | 0.0281<br>20311 |
| chr6:152128317-<br>152128517_mergedPeaks.32306_CCDC170_313243_<br>ESR1_396        | -<br>6.3517<br>89728 | 0.0008<br>73575 | 0.0281<br>39063 |
| chr17:33415837-<br>33416646_mergedPeaks.14224_RFFL_25482_RAD51<br>D_30647         | 1.1205<br>97144      | 0.0008<br>75944 | 0.0281<br>6755  |
| chr10:16829490-<br>16829906_mergedPeaks.3875_C1QL3_265694_RSU1_<br>29755          | -<br>3.2527<br>22641 | 0.0008<br>78023 | 0.0282<br>10472 |
| chr5:67729999-<br>67730713_mergedPeaks.28033_PIK3R1_218773_SLC<br>30A5_659419     | 1.3485<br>64029      | 0.0008<br>90305 | 0.0285<br>36064 |
| chr3:119278375-<br>119278695_mergedPeaks.23415_CD80_54_ADPRH_1<br>9987            | 6.2404<br>09151      | 0.0008<br>90921 | 0.0285<br>36064 |
| chr2:16195851-<br>16196611_mergedPeaks.17011_MYCNOS_114386_FA<br>M49A_650903      | 6.5082<br>6819       | 0.0008<br>91164 | 0.0285<br>36064 |
| chr2:161560435-<br>161561035_mergedPeaks.18931_RBMS1_210417_TA<br>NK_456203       | 6.2473<br>01128      | 0.0008<br>95838 | 0.0286<br>54447 |
| chr7:92861175-<br>92861914_mergedPeaks.33806_HEPACAM2_12636_<br>CCDC132_108       | -<br>1.0687<br>59793 | 0.0008<br>96372 | 0.0286<br>54447 |
| chr14:54907662-<br>54908390_mergedPeaks.10890_CDKN3_44354_CNIH<br>1_122           | 1.3932<br>0105       | 0.0008<br>98346 | 0.0286<br>93388 |
| chr4:56383781-                                                                    | 6.4042               | 0.0008          | 0.0287          |

|                                                                           |                      |                 |                 |
|---------------------------------------------------------------------------|----------------------|-----------------|-----------------|
| 56384344_mergedPeaks.25358_TMEM165_121983_CLOCK_29014                     | 68072                | 99875           | 04649           |
| chr15:78423690-78424030_mergedPeaks.12198_SH2D7_38934_CIB2_17             | 2.9518<br>32952      | 0.0009<br>03233 | 0.0287<br>59017 |
| chr17:7297674-7298234_mergedPeaks.13972_TNK1_13662_PLSCR3_208             | 2.0799<br>27108      | 0.0009<br>03783 | 0.0287<br>59017 |
| chr10:62111824-62112288_mergedPeaks.4414_C10orf40_391385_AN K3_37578      | 6.2473<br>6787       | 0.0009<br>0419  | 0.0287<br>59017 |
| chr17:42200866-42201449_mergedPeaks.14354_HDAC5_143_C17orf53_18116        | 1.3898<br>91599      | 0.0009<br>09021 | 0.0288<br>88443 |
| chr5:140998307-140999012_mergedPeaks.29211_DIAPH1_37_HDAC3_17764          | 1.1202<br>73611      | 0.0009<br>13404 | 0.0289<br>62667 |
| chr17:1359280-1359927_mergedPeaks.13873_CRK_42_MYO1C_29448                | 1.0875<br>66141      | 0.0009<br>13726 | 0.0289<br>62667 |
| chr19:10216650-10217119_mergedPeaks.15995_ANGPTL6_3459_PPA N-P2RY11_14    | 1.4563<br>30859      | 0.0009<br>14051 | 0.0289<br>62667 |
| chr5:63911670-63912161_mergedPeaks.27973_RGS7BP_40439_FAM159B_74219       | 6.2512<br>84501      | 0.0009<br>1441  | 0.0289<br>62667 |
| chr1:156698153-156698781_mergedPeaks.1889_RRNAD1_205_MRPL24_12456         | 1.4731<br>79992      | 0.0009<br>20571 | 0.0290<br>76706 |
| chr10:126077685-126078059_mergedPeaks.5369_CHST15_224749_OA T_29673       | 2.1415<br>06014      | 0.0009<br>20909 | 0.0290<br>76706 |
| chr4:145968374-145968682_mergedPeaks.26571_HHIP-AS1_401357_ABCE1_50627    | 6.2437<br>78923      | 0.0009<br>21075 | 0.0290<br>76706 |
| chr4:185235218-185235732_mergedPeaks.27216_ENPP6_96361_RP11-290F5.2_39655 | -<br>1.2801<br>64704 | 0.0009<br>24477 | 0.0291<br>59826 |
| chr10:3780097-3780531_mergedPeaks.3650_PITRM1_565281_KLF6_47159           | 6.5675<br>89123      | 0.0009<br>31208 | 0.0293<br>00276 |
| chr11:18415777-18416259_mergedPeaks.5768_LDHA_83_LDHC_17834               | 2.0724<br>15744      | 0.0009<br>31246 | 0.0293<br>00276 |
| chr12:1058592-                                                            | 1.0351               | 0.0009          | 0.0293          |

|                                                                                  |                      |                 |                 |
|----------------------------------------------------------------------------------|----------------------|-----------------|-----------------|
| 1059417_mergedPeaks.7387_RAD52_141_ERC1_413<br>99                                | 33668                | 3206            | 01577           |
| chr19:17416269-<br>17416754_mergedPeaks.16157_MRPL34_35_DDA1_3<br>825            | 1.4160<br>38119      | 0.0009<br>34125 | 0.0293<br>42199 |
| chr1:235931014-<br>235931553_mergedPeaks.3361_GNG4_117229_MIR1<br>537_85077      | 6.2476<br>15865      | 0.0009<br>36383 | 0.0293<br>7261  |
| chr14:91863814-<br>91864196_mergedPeaks.11382_GPR68_153153_CCD<br>C88C_20183     | -<br>5.9694<br>98187 | 0.0009<br>37002 | 0.0293<br>7261  |
| chr2:197141170-<br>197141532_mergedPeaks.19512_AC020571.3_16604<br>_HECW2_315984 | 6.6733<br>9309       | 0.0009<br>3827  | 0.0293<br>75116 |
| chr1:72433319-<br>72433751_mergedPeaks.924_NEGR1-<br>IT1_130840_NEGR1_314742     | 6.2517<br>10869      | 0.0009<br>43419 | 0.0295<br>11967 |
| chr16:67548304-<br>67548753_mergedPeaks.13358_AGRP_30812_LOC10<br>0505942_14120  | 6.3388<br>76021      | 0.0009<br>45389 | 0.0295<br>49238 |
| chr9:95820601-<br>95821121_mergedPeaks.37710_FGD3_94619_SUSD3<br>_108            | 1.1095<br>87277      | 0.0009<br>48194 | 0.0296<br>08097 |
| chr1:24741912-<br>24742406_mergedPeaks.278_STPG1_1897_NIPAL3_8<br>5              | 1.3643<br>52277      | 0.0009<br>51287 | 0.0296<br>08097 |
| chr12:95466924-<br>95467704_mergedPeaks.8775_NDUFA12_69825_NR<br>2C1_90          | 1.6930<br>68763      | 0.0009<br>5148  | 0.0296<br>08097 |
| chr10:7829810-<br>7830575_mergedPeaks.3738_ATP5C1_100_TAF3_30<br>274             | 1.0249<br>22788      | 0.0009<br>51929 | 0.0296<br>08097 |
| chr4:13388013-<br>13388435_mergedPeaks.24844_HS3ST1_1957687_R<br>AB28_97765      | 6.2364<br>0252       | 0.0009<br>52308 | 0.0296<br>08097 |
| chr2:29305679-<br>29306289_mergedPeaks.17176_C2orf71_8857_CLIP4<br>_31759        | 3.4220<br>32288      | 0.0009<br>5424  | 0.0296<br>08097 |
| chr2:241075598-<br>241075958_mergedPeaks.20233_MYEOV2_14_OTOS_<br>4295           | 6.2477<br>47836      | 0.0009<br>54294 | 0.0296<br>08097 |
| chr1:161147026-<br>161147471_mergedPeaks.1995_PPOX_11068_B4GAL<br>T3_510         | 2.5931<br>16344      | 0.0009<br>5648  | 0.0296<br>51673 |
| chr19:3035533-                                                                   | 1.3885               | 0.0009          | 0.0298          |

|                                                                         |              |             |             |
|-------------------------------------------------------------------------|--------------|-------------|-------------|
| 3036026_mergedPeaks.15879_TLE6_58244_TLE2_11854                         | 32284        | 63468       | 19561       |
| chr7:48285622-48286087_mergedPeaks.33336_ABCA13_74798_CDC14C_678302     | 6.256383419  | 0.000965158 | 0.029847522 |
| chrX:53713196-53713755_mergedPeaks.38935_MIRLET7F2_129240_HUWE1_199     | 1.533139745  | 0.000966062 | 0.029851157 |
| chr11:65625216-65625985_mergedPeaks.6376_SNX32_24191_CFL1_204           | 1.024660994  | 0.000968223 | 0.029893604 |
| chr8:97273582-97274358_mergedPeaks.36075_MTERFD1_129_PTDSS1_143         | 1.137236867  | 0.00097103  | 0.029907257 |
| chr3:185050155-185050533_mergedPeaks.24450_MAP3K13_49616_TMEM41A_166501 | -3.800128962 | 0.000973131 | 0.029947651 |
| chr10:25305142-25306045_mergedPeaks.4023_THNSL1_86_GPR158_158696        | 1.094513631  | 0.00097398  | 0.029949481 |
| chr6:25962517-25963170_mergedPeaks.30329_SLC17A2_31889_TRIM38_73        | 1.624426479  | 0.000975501 | 0.029971987 |
| chr19:46220360-46221087_mergedPeaks.16550_QPCTL_24983_FBXO46_13428      | 1.071346315  | 0.000976619 | 0.029973397 |
| chr9:140445897-140446604_mergedPeaks.38345_PNPLA7_1264_MRPL41_58        | 1.164227198  | 0.000977817 | 0.029973397 |
| chr12:10765948-10766513_mergedPeaks.7506_MAGOHB_22_STYK1_60661          | 2.027572756  | 0.000978226 | 0.029973397 |
| chr3:22605604-22605978_mergedPeaks.22089_ZNF385D_812975_UBE2E2_638992   | 6.239864706  | 0.000979497 | 0.029973397 |
| chr15:96817004-96817404_mergedPeaks.12458_LINC00924_840883_NR2F2_51952  | 6.416287582  | 0.000981307 | 0.030004584 |
| chr17:38478736-38479505_mergedPeaks.14294_RARA_4648_RARA-AS1_20268      | 1.401278177  | 0.000982726 | 0.030023789 |
| chr20:15876357-15876750_mergedPeaks.20512_MACROD2_699050_KIF16B_677526  | 6.252330921  | 0.000988467 | 0.030151914 |
| chr12:76953171-                                                         | 1.2890       | 0.0009      | 0.0301      |

|                                                                                           |                      |                 |                 |
|-------------------------------------------------------------------------------------------|----------------------|-----------------|-----------------|
| 76953952_mergedPeaks.8454_BBS10_211339_OSBP<br>L8_28                                      | 62842                | 88509           | 51914           |
| chr14:39519610-<br>39520008_mergedPeaks.10705_LINC00639_133723_<br>SEC23A_52628           | -<br>5.9815<br>50725 | 0.0010<br>04548 | 0.0306<br>16523 |
| chr2:137012269-<br>137012650_mergedPeaks.18537_CXCR4_138646_TH<br>SD7B_736002             | 6.2319<br>3219       | 0.0010<br>08113 | 0.0307<br>00527 |
| chr11:58984078-<br>58984742_mergedPeaks.6219_MPEG1_3916_OR5AN<br>1_147521                 | 1.9542<br>96204      | 0.0010<br>11564 | 0.0307<br>80921 |
| chr1:27816465-<br>27817154_mergedPeaks.340_WASF2_131_AHDC1_11<br>3334                     | 1.1864<br>44606      | 0.0010<br>1248  | 0.0307<br>84085 |
| chr1:112135373-<br>112135968_mergedPeaks.1532_ADORA3_88927_LIN<br>C01160_15270            | 1.6036<br>20067      | 0.0010<br>14274 | 0.0308<br>13962 |
| chr7:149321397-<br>149322151_mergedPeaks.34705_ZNF746_126876_Z<br>NF767P_107              | 1.4334<br>41161      | 0.0010<br>19113 | 0.0308<br>77368 |
| chr20:42310570-<br>42311036_mergedPeaks.20778_MYBL2_15145_GTSF<br>1L_44839                | 3.6954<br>3469       | 0.0010<br>21469 | 0.0308<br>77368 |
| chr20:35491795-<br>35492597_mergedPeaks.20705_SOGA1_3920_TLDC2<br>_12373                  | 1.4481<br>05406      | 0.0010<br>22612 | 0.0308<br>77368 |
| chr19:19701929-<br>19702272_mergedPeaks.16220_CILP2_53027_PBX4_<br>27625                  | 6.6054<br>97906      | 0.0010<br>2344  | 0.0308<br>77368 |
| chr4:38665293-<br>38665896_mergedPeaks.25139_RP11-<br>83C7.2_140793_KLF3_195              | 1.0566<br>725        | 0.0010<br>23513 | 0.0308<br>77368 |
| chr20:37075151-<br>37075504_mergedPeaks.20723_SNHG11_31_SNORA3<br>9_1398                  | 3.8116<br>04668      | 0.0010<br>23685 | 0.0308<br>77368 |
| chr2:62732921-<br>62733579_mergedPeaks.17631_MIR5192_300290_T<br>MEM17_354                | 2.8605<br>69074      | 0.0010<br>29948 | 0.0309<br>67813 |
| chr13:79980173-<br>79980892_mergedPeaks.10040_RBM26-<br>AS1_89_NDFIP2_74726               | 1.8662<br>56439      | 0.0010<br>33505 | 0.0310<br>50162 |
| chr1:219262170-<br>219262676_mergedPeaks.3008_RP11-<br>224019.2_743403_RP11-135J2.4_84707 | 2.3786<br>96804      | 0.0010<br>35484 | 0.0310<br>64488 |
| chr13:70617815-                                                                           | 3.4115               | 0.0010          | 0.0311          |

|                                                                             |                      |                 |                 |
|-----------------------------------------------------------------------------|----------------------|-----------------|-----------------|
| 70618216_mergedPeaks.9895_LINC00550_1158558_ATXN8OS_63329                   | 51007                | 38522           | 08564           |
| chr10:22937560-22937918_mergedPeaks.3974_LOC100499489_210881_PIP4K2A_65764  | 6.2353<br>93664      | 0.0010<br>39548 | 0.0311<br>08564 |
| chr3:18782113-18783131_mergedPeaks.22039_SATB1_315793_KCNH8_407394          | 1.5568<br>5804       | 0.0010<br>41807 | 0.0311<br>27056 |
| chr9:27485272-27485570_mergedPeaks.37233_EQTN_188284_IFNK_38890             | -<br>5.9577<br>77016 | 0.0010<br>50108 | 0.0313<br>50391 |
| chr2:223288928-223289164_mergedPeaks.19945_PAX3_125331_SGP2_275             | 6.4299<br>08761      | 0.0010<br>52773 | 0.0313<br>89642 |
| chr3:169966213-169966589_mergedPeaks.24174_PRKCI_26182_SKIL_111009          | 6.2438<br>52925      | 0.0010<br>53383 | 0.0313<br>89642 |
| chr6:119856440-119856904_mergedPeaks.31712_LOC285762_44205_TBC1D32_1798974  | 6.3391<br>76083      | 0.0010<br>55203 | 0.0313<br>89642 |
| chr2:99952507-99953240_mergedPeaks.18079_TXNDC9_13 EIF5B_960                | 1.0610<br>69259      | 0.0010<br>55536 | 0.0313<br>89642 |
| chr19:39342550-39342774_mergedPeaks.16395_ECH1_20165_HNRNPL_317             | 1.5380<br>84381      | 0.0010<br>58101 | 0.0314<br>19577 |
| chr2:122406743-122407895_mergedPeaks.18327_CLASP1_267_NIFK-AS1_245          | 1.0876<br>34478      | 0.0010<br>58909 | 0.0314<br>19577 |
| chr19:42759165-42759574_mergedPeaks.16469_ERF_60_CIC_29447                  | 2.1889<br>71939      | 0.0010<br>59083 | 0.0314<br>19577 |
| chr22:38071381-38072043_mergedPeaks.21530_LGALS1_100_NOL12_10631            | 1.6153<br>08088      | 0.0010<br>59878 | 0.0314<br>19577 |
| chr9:102847043-102847383_mergedPeaks.37820_STX17_178299_ERP44_14117         | 6.2351<br>56234      | 0.0010<br>61878 | 0.0314<br>24186 |
| chr18:51736047-51736725_mergedPeaks.15438_LOC101928167_628957_SNORA37_12396 | 1.7221<br>1623       | 0.0010<br>62518 | 0.0314<br>24186 |
| chr8:31878739-31879170_mergedPeaks.35164_PURG_987723_NRG1-IT1_4297          | 3.5125<br>35245      | 0.0010<br>69025 | 0.0315<br>92016 |
| chr2:232645834-232646569_mergedPeaks.20147_PDE6D_164_COPS7                  | -<br>1.0873          | 0.0010<br>7031  | 0.0316<br>05376 |

|                                                                                     |                      |                 |                 |
|-------------------------------------------------------------------------------------|----------------------|-----------------|-----------------|
| B_179                                                                               | 42873                |                 |                 |
| chr11:68227612-<br>68228344_mergedPeaks.6435_LRP5_147871_PPP6R<br>3_207             | 1.0621<br>82881      | 0.0010<br>72585 | 0.0316<br>24593 |
| chr1:23866391-<br>23866615_mergedPeaks.260_E2F2_8791_ID3_19782                      | 6.5237<br>66784      | 0.0010<br>72628 | 0.0316<br>24593 |
| chr16:75520605-<br>75520966_mergedPeaks.13557_TMEN170A_22201_<br>CHST6_8141         | 6.2485<br>51948      | 0.0010<br>7675  | 0.0317<br>21475 |
| chr6:99865063-<br>99865690_mergedPeaks.31381_COQ3_23294_PNISR_<br>7831              | 6.2534<br>97437      | 0.0010<br>83677 | 0.0318<br>99333 |
| chr19:51944798-<br>51945472_mergedPeaks.16666_SIGLEC10_24078_SI<br>GLEC8_16573      | 2.5245<br>44188      | 0.0010<br>84967 | 0.0318<br>99333 |
| chr9:80456885-<br>80457417_mergedPeaks.37560_GNA14_193919_GNA<br>Q_189214           | 6.4582<br>49452      | 0.0010<br>85309 | 0.0318<br>99333 |
| chr19:47291519-<br>47292140_mergedPeaks.16567_STRN4_42109_SLC1<br>A5_13             | 1.4984<br>25289      | 0.0010<br>8723  | 0.0319<br>31084 |
| chr4:137171835-<br>137172139_mergedPeaks.26430_LINC00613_36273<br>9_PCDH18_1281642  | 6.3520<br>85949      | 0.0010<br>94274 | 0.0321<br>131   |
| chr1:168996830-<br>168997526_mergedPeaks.2128_LINC00626_241000_<br>LINC00970_59065  | -<br>1.4220<br>19401 | 0.0011<br>04925 | 0.0323<br>4487  |
| chr5:115700636-<br>115701288_mergedPeaks.28768_COMMD10_280236<br>_LOC101927190_9305 | 2.2030<br>89455      | 0.0011<br>05889 | 0.0323<br>4487  |
| chr11:62389146-<br>62389929_mergedPeaks.6279_EML3_9300_B3GAT3_<br>110               | 1.0362<br>08232      | 0.0011<br>05924 | 0.0323<br>4487  |
| chr20:52367744-<br>52368254_mergedPeaks.20906_ZNF217_168363_SU<br>MO1P1_124249      | 3.4086<br>50983      | 0.0011<br>0622  | 0.0323<br>4487  |
| chr5:68665139-<br>68665898_mergedPeaks.28051_RAD17_395_AK6_32<br>2                  | 1.1896<br>49492      | 0.0011<br>06434 | 0.0323<br>4487  |
| chr16:84150077-<br>84151002_mergedPeaks.13696_SLC38A8_74777_MB<br>TPS1_9            | 1.0124<br>40797      | 0.0011<br>1199  | 0.0324<br>53649 |
| chr10:54044365-<br>54044757_mergedPeaks.4312_CSTF2T_585206_PRK<br>G1-AS1_29327      | 6.2538<br>16702      | 0.0011<br>1243  | 0.0324<br>53649 |



|                                                                                   |                      |                 |                 |
|-----------------------------------------------------------------------------------|----------------------|-----------------|-----------------|
| chr2:107748597-<br>107748964_mergedPeaks.18174_ST6GAL2_246170_<br>RGP4-AS1_693803 | 6.4648<br>19867      | 0.0011<br>12721 | 0.0324<br>53649 |
| chr16:87902720-<br>87903315_mergedPeaks.13786_MIR6775_34751_SL<br>C7A5_83         | 1.1739<br>13564      | 0.0011<br>23994 | 0.0327<br>12705 |
| chr20:13102685-<br>13103112_mergedPeaks.20463_SPTLC3_113272_ISM<br>1_99519        | 6.4301<br>42759      | 0.0011<br>24189 | 0.0327<br>12705 |
| chr2:85105622-<br>85105861_mergedPeaks.17944_DNAH6_362163_TR<br>ABD2A_2628        | 6.2345<br>05744      | 0.0011<br>26994 | 0.0327<br>44082 |
| chr17:49197955-<br>49198593_mergedPeaks.14464_SPAG9_73945_NME1<br>-NME2_32622     | 1.0412<br>36316      | 0.0011<br>30994 | 0.0328<br>35156 |
| chr15:78441413-<br>78442043_mergedPeaks.12199_IDH3A_10_ACSBG1_<br>85321           | 1.1525<br>03433      | 0.0011<br>32691 | 0.0328<br>593   |
| chr6:73941658-<br>73942094_mergedPeaks.31022_KHDC1L_6701_KHD<br>C1_78062          | 6.4645<br>56718      | 0.0011<br>35292 | 0.0329<br>09603 |
| chr19:40909383-<br>40909783_mergedPeaks.16425_HIPK4_13489_PRX_9<br>688            | 1.8417<br>59076      | 0.0011<br>40725 | 0.0330<br>16633 |
| chr1:67578087-<br>67578697_mergedPeaks.858_SLC35D1_58312_C1orf<br>141_22262       | 1.8218<br>86184      | 0.0011<br>44159 | 0.0330<br>90781 |
| chr6:48167213-<br>48167414_mergedPeaks.30720_PTCHD4_130888_M<br>UT_1263728        | -<br>7.1009<br>92879 | 0.0011<br>59185 | 0.0334<br>48882 |
| chr1:26496078-<br>26496583_mergedPeaks.313_FAM110D_10820_ZNF5<br>93_57            | 2.4791<br>60876      | 0.0011<br>62236 | 0.0335<br>11433 |
| chr4:128172611-<br>128172934_mergedPeaks.26350_MIR2054_1744359<br>_INTU_381314    | -<br>5.7072<br>5448  | 0.0011<br>64652 | 0.0335<br>55604 |
| chr11:89955823-<br>89956728_mergedPeaks.6714_NAALAD2_88458_CH<br>ORDC1_257        | 1.0612<br>92444      | 0.0011<br>68947 | 0.0336<br>53802 |
| chrX:11776155-<br>11776806_mergedPeaks.38449_MSL3_203_FRMPD4_<br>380104           | 1.2024<br>96925      | 0.0011<br>7327  | 0.0337<br>33954 |
| chr6:31620049-<br>31620776_mergedPeaks.30466_APOM_226_BAG6_65                     | 1.1230<br>34066      | 0.0011<br>7351  | 0.0337<br>33954 |
| chr5:176873544-                                                                   | 6.6306               | 0.0011          | 0.0338          |

|                                                                                |                 |                 |                 |
|--------------------------------------------------------------------------------|-----------------|-----------------|-----------------|
| 176873808_mergedPeaks.29815_GRK6_19990_PRR7_119                                | 74127           | 77838           | 07145           |
| chr11:88090383-88090968_mergedPeaks.6698_CTSC_19734_GRM5-AS1_147068            | 1.8544<br>75977 | 0.0011<br>83062 | 0.0338<br>50183 |
| chr5:125797886-125798391_mergedPeaks.28934_GRAMD3_39270_ALDH7A1_132944         | 6.3028<br>02878 | 0.0011<br>83067 | 0.0338<br>50183 |
| chr17:28927415-28927952_mergedPeaks.14195_LRRC37BP1_24201_SH3GL1P2_23652       | 2.5684<br>01246 | 0.0011<br>8435  | 0.0338<br>50183 |
| chr9:100173942-100174552_mergedPeaks.37764_LOC286359_15274_TDRD7_54            | 1.1478<br>3419  | 0.0011<br>85443 | 0.0338<br>50183 |
| chr2:232378868-232379494_mergedPeaks.20136_LINC00471_131_NMUR1_16001           | 1.0466<br>86749 | 0.0011<br>85582 | 0.0338<br>50183 |
| chr5:131999720-132000176_mergedPeaks.29053_IL13_6084_IL4_9729                  | 2.1717<br>977   | 0.0011<br>90754 | 0.0339<br>72299 |
| chr4:133423277-133423718_mergedPeaks.26409_RP11-519M16.1_2730864_PCDH10_646972 | 6.2491<br>99852 | 0.0011<br>95356 | 0.0340<br>6926  |
| chr20:36010165-36010375_mergedPeaks.20717_SRC_35740_NNAT_139336                | 6.6362<br>20481 | 0.0011<br>95948 | 0.0340<br>6926  |
| chr5:127156635-127157093_mergedPeaks.28972_CTXN3_172152_LINCO1184_261902       | 6.1468<br>94482 | 0.0012<br>02744 | 0.0341<br>99575 |
| chr3:107317762-107318314_mergedPeaks.23206_BBX_76256_LINCO0635_278877          | 2.4762<br>77011 | 0.0012<br>02945 | 0.0341<br>99575 |
| chr19:35464049-35464309_mergedPeaks.16305_ZNF792_9226_GRAMD1A_27066            | 6.4230<br>09975 | 0.0012<br>03227 | 0.0341<br>99575 |
| chr11:67188451-67188949_mergedPeaks.6417_CARNS1_5552_RPS6KB2_7234              | 1.4560<br>8623  | 0.0012<br>04203 | 0.0342<br>01716 |
| chr22:24666476-24667157_mergedPeaks.21421_SPECC1L_32_ADORA2A_161270            | 1.0421<br>80619 | 0.0012<br>06711 | 0.0342<br>47307 |
| chr19:4670276-4670653_mergedPeaks.15912_C19orf10_49_AC005594.3_8829            | 1.7341<br>41831 | 0.0012<br>1093  | 0.0343<br>41352 |
| chr7:82188543-                                                                 | 6.1439          | 0.0012          | 0.0343          |

|                                                                                  |                      |                 |                 |
|----------------------------------------------------------------------------------|----------------------|-----------------|-----------------|
| 82189214_mergedPeaks.33623_CACNA2D1_115847_P<br>CLO_603319                       | 59603                | 12901           | 58879           |
| chr17:27053873-<br>27054489_mergedPeaks.14168_TLCD1_951_NEK8_1<br>650            | 1.0735<br>63894      | 0.0012<br>13359 | 0.0343<br>58879 |
| chr19:13263673-<br>13264058_mergedPeaks.16086_IER2_2584_CACNA1<br>A_353409       | 1.2141<br>09843      | 0.0012<br>15521 | 0.0343<br>94441 |
| chr22:45559447-<br>45560112_mergedPeaks.21641_NUP50_54_MIR1249<br>_37121         | 1.6926<br>59879      | 0.0012<br>24045 | 0.0346<br>09836 |
| chr20:52539484-<br>52539850_mergedPeaks.20917_SUMO1P1_47419_MI<br>R4756_145357   | 6.5896<br>28254      | 0.0012<br>28558 | 0.0346<br>90101 |
| chr16:9934853-<br>9935569_mergedPeaks.12706_MIR7641-<br>2_276963_GRIN2A_341400   | 2.1919<br>28451      | 0.0012<br>28712 | 0.0346<br>90101 |
| chr2:157292305-<br>157293106_mergedPeaks.18842_NR4A2_103418_GP<br>D2_194         | 1.7289<br>99424      | 0.0012<br>35115 | 0.0348<br>44935 |
| chr5:159885897-<br>159886592_mergedPeaks.29595_PTTG1_37328_MIR<br>3142_15164     | 2.1418<br>64002      | 0.0012<br>37094 | 0.0348<br>74838 |
| chr3:1422897-<br>1423225_mergedPeaks.21711_CNTN6_288720_CNT<br>N4-AS2_762864     | 6.2609<br>34449      | 0.0012<br>39866 | 0.0348<br>7585  |
| chr17:80709231-<br>80710019_mergedPeaks.14898_FN3K_16174_TBCD_<br>314            | 1.3778<br>24244      | 0.0012<br>39887 | 0.0348<br>7585  |
| chr3:98331422-<br>98332378_mergedPeaks.23039_CPOX_19445_ST3GA<br>L6_119179       | 1.2092<br>93887      | 0.0012<br>42184 | 0.0349<br>14576 |
| chr11:8008470-<br>8009075_mergedPeaks.5606_NLRP10_23713_EIF3F_<br>94             | -<br>1.0526<br>70088 | 0.0012<br>44275 | 0.0349<br>36562 |
| chr9:100130006-<br>100130349_mergedPeaks.37760_CCDC180_60268_L<br>OC286359_28796 | -<br>3.8016<br>26327 | 0.0012<br>45846 | 0.0349<br>36562 |
| chr9:104295650-<br>104296359_mergedPeaks.37840_TMEM246_46529_<br>RNF20_126       | 1.1923<br>35218      | 0.0012<br>46499 | 0.0349<br>36562 |
| chr12:110718645-<br>110719542_mergedPeaks.9024_ATP2A2_62_ANAPC7<br>_122442       | 1.1950<br>2509       | 0.0012<br>46649 | 0.0349<br>36562 |
| chr19:50144987-                                                                  | 1.0126               | 0.0012          | 0.0349          |

|                                                                              |                      |                 |                 |
|------------------------------------------------------------------------------|----------------------|-----------------|-----------------|
| 50145599_mergedPeaks.16631_RRAS_1893_SCAF1_88                                | 04623                | 50188           | 84058           |
| chr16:3174046-3174818_mergedPeaks.12636_ZNF205-AS1_8833_RP11-473M20.14_10451 | 1.2932<br>36567      | 0.0012<br>55944 | 0.0351<br>19242 |
| chr6:26103873-26104601_mergedPeaks.30341_HIST1H4C_62_HIST1H1T_4127           | 1.0239<br>53305      | 0.0012<br>59762 | 0.0352<br>00046 |
| chr1:207925089-207925849_mergedPeaks.2808_CD46_87_MIR29C_49815               | 1.1441<br>04781      | 0.0012<br>63702 | 0.0352<br>6348  |
| chrX:41782588-41783137_mergedPeaks.38806_CASK_575_PPP1R2P9_854624            | 1.3596<br>66148      | 0.0012<br>63891 | 0.0352<br>6348  |
| chr4:170359091-170359651_mergedPeaks.27011_SH3RF1_167122_NEK1_174407         | -<br>2.4820<br>53974 | 0.0012<br>74877 | 0.0354<br>77963 |
| chr21:45358514-45359247_mergedPeaks.21309_AGPAT3_73765_TRAPPC10_73325        | 1.3674<br>31788      | 0.0012<br>75318 | 0.0354<br>77963 |
| chr2:201981313-201981735_mergedPeaks.19605_NDUFB3_45063_CFLAR_23473          | 1.7640<br>89673      | 0.0012<br>84203 | 0.0356<br>98952 |
| chr17:79008495-79009374_mergedPeaks.14855_BAIAP2-AS1_415_BAIAP2_12           | 1.1754<br>2568       | 0.0012<br>891   | 0.0357<br>58128 |
| chr11:67232050-67232458_mergedPeaks.6419_CABP4_9437_TMEM134_4494             | 1.4827<br>29813      | 0.0012<br>90437 | 0.0357<br>58128 |
| chr1:191527451-191527865_mergedPeaks.2515_RP11-463J7.2_933639_RGS18_599933   | 6.2616<br>10564      | 0.0012<br>92006 | 0.0357<br>58128 |
| chr17:17726844-17727398_mergedPeaks.14083_MIR33B_9876_SREBF1_13204           | 1.7998<br>85403      | 0.0012<br>928   | 0.0357<br>58128 |
| chr1:38157724-38158314_mergedPeaks.471_C1orf109_1827_CDCA8_53                | 1.0841<br>488        | 0.0012<br>92851 | 0.0357<br>58128 |
| chr20:16553822-16554429_mergedPeaks.20524_KIF16B_46_SNRPB2_156483            | 1.3308<br>71405      | 0.0012<br>93518 | 0.0357<br>58128 |
| chr16:58136874-58137319_mergedPeaks.13263_MMP15_77815_C16orf80_26200         | 6.1472<br>10608      | 0.0012<br>9387  | 0.0357<br>58128 |
| chr4:36082827-                                                               | 6.1508               | 0.0012          | 0.0357          |

|                                                                       |                 |                 |                 |
|-----------------------------------------------------------------------|-----------------|-----------------|-----------------|
| 36083295_mergedPeaks.25092_PCDH7_5361032_AR AP2_162918                | 78644           | 95966           | 89989           |
| chr11:60222807-60223481_mergedPeaks.6242_MS4A5_26083_MS4A1_137        | 1.2309<br>49931 | 0.0012<br>98073 | 0.0358<br>22094 |
| chr16:15736369-15737346_mergedPeaks.12804_MIR6506_31905_KIA A0430_166 | 1.1213<br>35704 | 0.0012<br>99378 | 0.0358<br>32049 |
| chr8:6547598-6548413_mergedPeaks.34848_MIR8055_68264_AGP AT5_17872    | 1.2180<br>47813 | 0.0013<br>01232 | 0.0358<br>57102 |
| chr22:28315127-28315662_mergedPeaks.21438_TTC28-AS1_31_MIR3199-2_1119 | 1.0454<br>18513 | 0.0013<br>10396 | 0.0360<br>33186 |
| chr4:151973504-151973966_mergedPeaks.26687_LRBA_37086_RPS3 A_46989    | 6.1402<br>85496 | 0.0013<br>1047  | 0.0360<br>33186 |
| chr7:24875769-24876064_mergedPeaks.32999_DFNA5_78833_OSBP L3_143915   | 6.4081<br>40249 | 0.0013<br>17562 | 0.0362<br>01945 |
| chr7:86945582-86946049_mergedPeaks.33678_TMEM243_96784_T P53TG1_28993 | 6.1472<br>92382 | 0.0013<br>19353 | 0.0362<br>24918 |
| chr18:29077831-29078560_mergedPeaks.15170_DSG2_169_RP11-75N4.2_58679  | 1.8355<br>76937 | 0.0013<br>26443 | 0.0363<br>66968 |
| chr12:69202429-69202936_mergedPeaks.8352_MDM2_731_CPM_124 297         | 1.1747<br>33877 | 0.0013<br>32302 | 0.0364<br>92572 |
| chr17:29058441-29058896_mergedPeaks.14196_SUZ12P1_22043_CR LF3_93110  | 2.9042<br>07636 | 0.0013<br>34842 | 0.0365<br>1807  |
| chr19:2168817-2169245_mergedPeaks.15857_DOT1L_4884_MIR122 7_65117     | 1.3470<br>70446 | 0.0013<br>37816 | 0.0365<br>73073 |
| chr8:102805647-102806330_mergedPeaks.36159_GRHL2_301321_NC ALD_330574 | 3.3751<br>39738 | 0.0013<br>39048 | 0.0365<br>80403 |
| chr12:76132240-76132686_mergedPeaks.8431_KRR1_227045_PHLDA 1_293093   | 6.1473<br>60521 | 0.0013<br>41237 | 0.0366<br>13851 |
| chr10:18698965-18699346_mergedPeaks.3908_CACNB2_269550_NSU N6_241395  | 6.1512<br>99341 | 0.0013<br>42624 | 0.0366<br>2536  |
| chr6:102434289-                                                       | 3.3557          | 0.0013          | 0.0366          |

|                                                                             |             |             |             |
|-----------------------------------------------------------------------------|-------------|-------------|-------------|
| 102434792_mergedPeaks.31417_GRIK2_587680_HACE1_2873254                      | 8979        | 4632        | 99794       |
| chr9:103211564-103212048_mergedPeaks.37827_MSANTD3-TMEFF1_7619_TMEFF1_23713 | 6.262304362 | 0.001349433 | 0.03671642  |
| chr5:55376298-55377186_mergedPeaks.27852_FLJ31104_85748_ANKRD55_152444      | 1.575562993 | 0.001354022 | 0.036773351 |
| chr2:178013470-178013945_mergedPeaks.19143_AC017048.4_511226_HNRNPA3_63714  | 6.325929562 | 0.001354194 | 0.036773351 |
| chr2:48460154-48460567_mergedPeaks.17456_FBXO11_327428_FOXN2_81434          | 6.407994597 | 0.001354833 | 0.036773351 |
| chr18:77960175-77960797_mergedPeaks.15791_PARD6G-AS1_54680_PARD6G_44911     | 2.769027845 | 0.001356902 | 0.036803179 |
| chr17:40118562-40119019_mergedPeaks.14314_CNP_32_DNAJC7_50393               | 2.198409577 | 0.001360355 | 0.036870278 |
| chr2:162016596-162017205_mergedPeaks.18942_RBMS1_666582_TANK_38             | 1.204288529 | 0.001365318 | 0.036925872 |
| chr5:159935831-159936181_mergedPeaks.29599_MIR146A_23648_ATP10B_343213      | 6.151514483 | 0.001367617 | 0.036935386 |
| chr11:67888714-67889266_mergedPeaks.6432_CHKA_132_SUV420H1_91794            | 1.240060454 | 0.001373081 | 0.03704242  |
| chr17:48784686-48784917_mergedPeaks.14456_ABCC3_72584_ANKRD40_469           | 6.332764187 | 0.001378382 | 0.037146813 |
| chr7:26331283-26331849_mergedPeaks.33031_CBX3_90243_SNX10_72378             | 2.302869664 | 0.001382237 | 0.037224257 |
| chr21:30257250-30257861_mergedPeaks.21129_LINC00161_345916_N6AMT1_140       | 1.186500955 | 0.001386219 | 0.03730503  |
| chr15:44068439-44068822_mergedPeaks.11784_PDIA3_30041_ELL3_872              | 1.920964885 | 0.001398029 | 0.037569552 |
| chr9:34522929-34523329_mergedPeaks.37308_ENHO_92_CNTFR-AS1_44880            | 3.052826963 | 0.001408481 | 0.037810093 |
| chr2:178770808-                                                             | -           | 0.0014      | 0.0378      |

|                                                                                     |                      |                 |                 |
|-------------------------------------------------------------------------------------|----------------------|-----------------|-----------------|
| 178771196_mergedPeaks.19160_TTC30A_287308_P<br>DE11A_16562                          | 3.7782<br>38082      | 09659           | 10093           |
| chr20:35089484-<br>35090264_mergedPeaks.20699_DLGAP4_33_MYL9_8<br>0012              | 1.2537<br>26199      | 0.0014<br>12154 | 0.0378<br>4194  |
| chr17:79790790-<br>79791423_mergedPeaks.14868_GCGR_29097_FAM19<br>5B_64             | 1.1198<br>02821      | 0.0014<br>15817 | 0.0379<br>13324 |
| chr1:93645763-<br>93646443_mergedPeaks.1261_MTF2_101312_TMED<br>5_143               | 1.0996<br>34253      | 0.0014<br>24849 | 0.0381<br>24474 |
| chr5:133983985-<br>133984743_mergedPeaks.29092_SAR1B_15831_SEC<br>24A_110           | 1.9672<br>72305      | 0.0014<br>25712 | 0.0381<br>24474 |
| chr9:23757358-<br>23757558_mergedPeaks.37193_LINC01239_111126<br>0_ELAVL2_68605     | -<br>5.7063<br>97895 | 0.0014<br>2911  | 0.0381<br>71926 |
| chr7:22893537-<br>22894165_mergedPeaks.32953_TOMM7_31380_SNO<br>RD93_2380           | 1.1682<br>91599      | 0.0014<br>34761 | 0.0382<br>85511 |
| chr16:31191001-<br>31192199_mergedPeaks.13016_FUS_170_C16orf98_2<br>1605            | 1.0964<br>41815      | 0.0014<br>35928 | 0.0382<br>89733 |
| chr1:198222431-<br>198223253_mergedPeaks.2604_NEK7_96735_ATP6V<br>1G3_287233        | 2.0608<br>62612      | 0.0014<br>41677 | 0.0383<br>90387 |
| chr8:61615563-<br>61616191_mergedPeaks.35502_CHD7_24554_LOC10<br>0130298_264430     | -<br>1.6813<br>39058 | 0.0014<br>43536 | 0.0384<br>11618 |
| chr16:86597415-<br>86597727_mergedPeaks.13762_FLJ30679_8646_FOX<br>C2_3285          | 6.7408<br>82247      | 0.0014<br>47611 | 0.0384<br>93064 |
| chr19:33726355-<br>33726881_mergedPeaks.16285_SLC7A10_9862_CEB<br>PA_66852          | 2.8983<br>89111      | 0.0014<br>52266 | 0.0385<br>89801 |
| chr5:140893506-<br>140893909_mergedPeaks.29204_PCDHGC5_24900_L<br>OC100505658_44170 | 2.0727<br>09931      | 0.0014<br>54152 | 0.0386<br>12864 |
| chr3:105891573-<br>105892103_mergedPeaks.23184_CBLB_303951_LINC<br>00882_1067647    | 2.0540<br>87341      | 0.0014<br>66837 | 0.0389<br>22456 |
| chr3:145535699-<br>145536049_mergedPeaks.23768_C3orf58_1843708_<br>PLOC2_343408     | 6.3778<br>28823      | 0.0014<br>71022 | 0.0389<br>64206 |
| chr6:35699113-                                                                      | 1.0774               | 0.0014          | 0.0389          |

|                                                                            |                 |                 |                 |
|----------------------------------------------------------------------------|-----------------|-----------------|-----------------|
| 35699978_mergedPeaks.30552_FKBP5_42826_RP3-51008.4_5179                    | 86378           | 72257           | 64206           |
| chr14:59823508-59823752_mergedPeaks.10969_DAAM1_168250_GPR135_108429       | 6.4075<br>70644 | 0.0014<br>72517 | 0.0389<br>64206 |
| chr16:90038710-90039421_mergedPeaks.13860_AFG3L1P_78_CENPB D1_175          | 1.6067<br>2533  | 0.0014<br>74384 | 0.0389<br>82948 |
| chr20:10539260-10539783_mergedPeaks.20436_SLX4IP_123571_MIR6870_90822      | 6.2145<br>84323 | 0.0014<br>88466 | 0.0392<br>86754 |
| chr8:22573093-22573733_mergedPeaks.35020_EGR3_22598_PEBP4_212008           | 1.5476<br>73246 | 0.0014<br>88848 | 0.0392<br>86754 |
| chr4:105789977-105790551_mergedPeaks.26014_CXXC4_374206_TE T2_276767       | 2.1716<br>55941 | 0.0014<br>90722 | 0.0393<br>08847 |
| chr20:55966153-55966685_mergedPeaks.20942_MTRNR2L3_31541_RBM38_34          | 1.1645<br>49449 | 0.0015<br>03357 | 0.0395<br>95635 |
| chr19:1354604-1355128_mergedPeaks.15828_EFNA2_68714_MUM1_109               | 1.0256<br>30876 | 0.0015<br>03685 | 0.0395<br>95635 |
| chr22:29563171-29563797_mergedPeaks.21448_KREMEN1_94419_E MID1_38416       | 1.3935<br>21474 | 0.0015<br>08696 | 0.0396<br>99614 |
| chr2:97151603-97152222_mergedPeaks.18042_NCAPH_150434_NE URL3_21934        | 2.4980<br>64167 | 0.0015<br>11818 | 0.0396<br>99614 |
| chr5:160973620-160974160_mergedPeaks.29617_RP11-109J4.1_608257_GABRB2_1240 | 3.2979<br>036   | 0.0015<br>17558 | 0.0398<br>22776 |
| chr14:64761594-64761968_mergedPeaks.11049_ESR2_653_TEX21P_52548            | 6.2255<br>45739 | 0.0015<br>20331 | 0.0398<br>67982 |
| chr16:85604205-85604830_mergedPeaks.13738_MIR5093_264586_G SE1_42324       | 2.7363<br>04902 | 0.0015<br>22596 | 0.0398<br>99805 |
| chr11:87850340-87850986_mergedPeaks.6680_TMEN135_1101778_RAB38_57972       | 2.6561<br>04792 | 0.0015<br>27011 | 0.0399<br>69611 |
| chr16:89313724-89314298_mergedPeaks.13828_ZNF778_29901_AC137932.6_73529    | 1.8815<br>29612 | 0.0015<br>27367 | 0.0399<br>69611 |
| chr15:59981285-                                                            | 1.1633          | 0.0015          | 0.0399          |



|                                                                                      |                      |                 |                 |
|--------------------------------------------------------------------------------------|----------------------|-----------------|-----------------|
| 59981914_mergedPeaks.11957_GTF2A2_31862_BNI<br>P2_43                                 | 6918                 | 29462           | 96855           |
| chr2:201390550-<br>201391126_mergedPeaks.19596_KCTD18_16046_SG<br>OL2_26             | 1.5112<br>85998      | 0.0015<br>37795 | 0.0401<br>87075 |
| chr11:14566147-<br>14566468_mergedPeaks.5714_PSMA1_24316_PDE3B<br>_98961             | 6.1479<br>06628      | 0.0015<br>41099 | 0.0402<br>45689 |
| chr15:52374977-<br>52375417_mergedPeaks.11870_MAPK6_63787_BCL2<br>L10_29775          | 6.2643<br>16452      | 0.0015<br>42447 | 0.0402<br>53212 |
| chr6:71418234-<br>71418520_mergedPeaks.30977_SMAP1_40904_B3GA<br>T2_248411           | -<br>3.7980<br>79556 | 0.0015<br>43987 | 0.0402<br>65704 |
| chr20:25176051-<br>25176744_mergedPeaks.20615_ENTPD6_59_LOC101<br>926889_1131        | 1.4272<br>36039      | 0.0015<br>46416 | 0.0402<br>75968 |
| chr13:65502969-<br>65503446_mergedPeaks.9848_LINC00395_1191056_<br>PCDH9-AS2_1896093 | 6.1479<br>19748      | 0.0015<br>46504 | 0.0402<br>75968 |
| chr20:43594820-<br>43595352_mergedPeaks.20796_TOMM34_5972_STK<br>4-AS1_13            | 1.4196<br>41342      | 0.0015<br>48256 | 0.0402<br>93954 |
| chr13:86564549-<br>86564941_mergedPeaks.10116_SLITRK6_191262_MI<br>R4500_1706250     | 6.1479<br>35584      | 0.0015<br>5307  | 0.0403<br>9153  |
| chr15:65321757-<br>65322112_mergedPeaks.12028_SPG21_39650_MTFM<br>T_43               | 2.6347<br>94195      | 0.0015<br>57107 | 0.0403<br>96126 |
| chr5:58012455-<br>58012947_mergedPeaks.27888_RAB3C_133763_PDE<br>4D_283058           | 6.2506<br>64449      | 0.0015<br>5735  | 0.0403<br>96126 |
| chr22:26824752-<br>26825421_mergedPeaks.21430_SEZ6L_259647_ASP<br>HD2_193            | 1.3049<br>61963      | 0.0015<br>57505 | 0.0403<br>96126 |
| chr2:73964335-<br>73964861_mergedPeaks.17809_TPRKB_81_DUSP11_<br>42686               | 2.2666<br>96543      | 0.0015<br>64671 | 0.0405<br>49206 |
| chr6:152593078-<br>152593662_mergedPeaks.32313_ESR1_464557_SYN<br>E1_365164          | 6.3634<br>81984      | 0.0015<br>65545 | 0.0405<br>49206 |
| chr8:96240504-<br>96240902_mergedPeaks.36058_C8orf69_12101_LOC<br>100616530_40360    | 6.2191<br>5737       | 0.0015<br>67781 | 0.0405<br>52513 |
| chr11:102217396-                                                                     | 1.3010               | 0.0015          | 0.0405          |

|                                                                               |                 |                 |                 |
|-------------------------------------------------------------------------------|-----------------|-----------------|-----------------|
| 102218225_mergedPeaks.6855_BIRC3_29630_BIRC2_102                              | 68607           | 6781            | 52513           |
| chr17:48278139-48278364_mergedPeaks.14446_HILS1_28414_COL1A1_749              | 6.6163<br>25236 | 0.0015<br>74067 | 0.0406<br>68599 |
| chr1:151253707-151254073_mergedPeaks.1766_PSMD4_26694_ZNF687_900              | 1.3121<br>04763 | 0.0015<br>7525  | 0.0406<br>68599 |
| chr10:103892400-103893033_mergedPeaks.5038_LDB1_12506_PPRC1_34                | 1.2061<br>9184  | 0.0015<br>75513 | 0.0406<br>68599 |
| chr1:71375741-71376089_mergedPeaks.918_CTH_499015_ZRANB2-AS1_136273           | 6.1383<br>98616 | 0.0015<br>78184 | 0.0407<br>09859 |
| chr2:69016750-69017063_mergedPeaks.17736_ARHGAP25_54994_BMP10_81743           | 6.1531<br>32676 | 0.0015<br>84331 | 0.0408<br>11599 |
| chr19:40790887-40791792_mergedPeaks.16423_AKT2_37_PLD3_62992                  | 1.0381<br>83097 | 0.0015<br>85558 | 0.0408<br>11599 |
| chr10:34813283-34813731_mergedPeaks.4145_LINC00838_751899_PARD3_290746        | 6.1531<br>71406 | 0.0015<br>90227 | 0.0408<br>25629 |
| chr22:43045138-43045682_mergedPeaks.21621_CYB5R3_2415_A4GALT_71466            | 2.2288<br>37097 | 0.0015<br>91385 | 0.0408<br>25629 |
| chr3:52312230-52312972_mergedPeaks.22542_MIRLET7G_10224_WDR82_58              | 1.2918<br>12451 | 0.0015<br>92356 | 0.0408<br>25629 |
| chr21:38338706-38339274_mergedPeaks.21245_SIM2_267000_HLCS_23555              | 1.4557<br>58259 | 0.0015<br>94468 | 0.0408<br>52025 |
| chr6:31465651-31465901_mergedPeaks.30461_MICB_3119_MCCD1_30962                | 3.5460<br>18109 | 0.0015<br>95538 | 0.0408<br>52025 |
| chr3:168292422-168292971_mergedPeaks.24144_MIR551B_23055_RP11-368I23.2_327036 | 6.1586<br>34647 | 0.0016<br>00029 | 0.0409<br>39382 |
| chr18:21166264-21167119_mergedPeaks.15080_NPC1_110_ANKRD29_76158              | 1.0156<br>66351 | 0.0016<br>05307 | 0.0410<br>46749 |
| chr9:1938723-1939120_mergedPeaks.36914_DMRT2_888302_SMARCA2_219530            | 3.6091<br>89617 | 0.0016<br>22196 | 0.0413<br>36758 |
| chr7:134921475-                                                               | 6.1645          | 0.0016          | 0.0413          |

|                                                                                      |                 |                 |                 |
|--------------------------------------------------------------------------------------|-----------------|-----------------|-----------------|
| 134921954_mergedPeaks.34483_STRA8_4984_CN<br>4_273161                                | 97698           | 23514           | 36758           |
| chr12:32112064-<br>32112852_mergedPeaks.7860_KIAA1551_106_RNU6<br>-78P_34344         | 1.5572<br>31122 | 0.0016<br>23748 | 0.0413<br>36758 |
| chr7:155514750-<br>155515118_mergedPeaks.34781_RBM33_77732_SH<br>H_90033             | 6.2508<br>76513 | 0.0016<br>24275 | 0.0413<br>36758 |
| chr3:171856577-<br>171856964_mergedPeaks.24215_FNDC3B_98427_GH<br>SR_309476          | 3.2974<br>26443 | 0.0016<br>29398 | 0.0414<br>11588 |
| chr14:106873406-<br>106873994_mergedPeaks.11584_LINC00226_12943<br>2_LINC00221_64744 | 1.2677<br>0195  | 0.0016<br>30618 | 0.0414<br>14871 |
| chr19:17716945-<br>17717235_mergedPeaks.16169_COLGALT1_50580_U<br>NC13A_81918        | 6.7178<br>47967 | 0.0016<br>32255 | 0.0414<br>28716 |
| chr14:55595809-<br>55596107_mergedPeaks.10907_LGALS3_24_DLGAP5<br>_62438             | 6.6104<br>50399 | 0.0016<br>38949 | 0.0415<br>15311 |
| chr8:39338125-<br>39338516_mergedPeaks.35248_ADAM5_166139_AD<br>AM3A_42188           | 6.3759<br>96791 | 0.0016<br>47016 | 0.0416<br>3627  |
| chr9:82245534-<br>82246331_mergedPeaks.37591_TLE4_59245_TLE1_2<br>057664             | 1.9425<br>21632 | 0.0016<br>55942 | 0.0417<br>78415 |
| chr7:2353852-<br>2354485_mergedPeaks.32651_SNX8_69_EIF3B_4030<br>5                   | 1.0084<br>72206 | 0.0016<br>6042  | 0.0418<br>63536 |
| chr15:45003431-<br>45004077_mergedPeaks.11796_B2M_70_TRIM69_24<br>805                | 1.3542<br>14226 | 0.0016<br>66172 | 0.0419<br>80669 |
| chr12:6643354-<br>6644366_mergedPeaks.7430_SCARNA10_24473_GAP<br>DH_524              | 1.0336<br>94792 | 0.0016<br>69877 | 0.0420<br>22212 |
| chr9:37485552-<br>37486124_mergedPeaks.37370_ZBTB5_20431_POLR<br>1E_93               | 1.3115<br>08038 | 0.0016<br>71002 | 0.0420<br>22212 |
| chr20:57556015-<br>57556735_mergedPeaks.20963_NELFCD_113_CTSZ_<br>25934              | 1.3372<br>77646 | 0.0016<br>7191  | 0.0420<br>22212 |
| chr6:134556989-<br>134557592_mergedPeaks.31953_SGK1_60220_LINC0<br>1010_201563       | 6.1429<br>29166 | 0.0016<br>7225  | 0.0420<br>22212 |
| chr9:71596801-                                                                       | 6.1329          | 0.0016          | 0.0420          |

|                                                                         |                      |                 |                 |
|-------------------------------------------------------------------------|----------------------|-----------------|-----------------|
| 71597140_mergedPeaks.37447_LOC101927069_6213_PRKACG_32069               | 44807                | 74683           | 36482           |
| chr6:144261200-144261405_mergedPeaks.32155_ZC2HC1B_75730_PLAGL1_68239   | -<br>3.9800<br>13104 | 0.0016<br>75817 | 0.0420<br>36482 |
| chr6:52528959-52529740_mergedPeaks.30769_LOC730101_151_TMEM14A_6534     | 1.1619<br>26206      | 0.0016<br>7725  | 0.0420<br>36482 |
| chr1:176294497-176294703_mergedPeaks.2279_RFWD2_118220_PAPPA2_137706    | -<br>6.2144<br>05592 | 0.0016<br>83986 | 0.0421<br>49627 |
| chr19:45754326-45754618_mergedPeaks.16527_EXOC3L2_17003_MARK4_43        | 6.5573<br>52308      | 0.0016<br>85782 | 0.0421<br>66773 |
| chr2:214049910-214050422_mergedPeaks.19775_IKZF2_33833_AC079610.2_98763 | 6.1377<br>70936      | 0.0016<br>87012 | 0.0421<br>69735 |
| chr8:66893966-66894790_mergedPeaks.35586_PDE7A_193049_DNAJC5B_39412     | 1.1022<br>46764      | 0.0016<br>89362 | 0.0422<br>00691 |
| chr16:2317854-2318672_mergedPeaks.12609_ECI1_16661_RNPS1_150            | 1.1959<br>36924      | 0.0016<br>96319 | 0.0423<br>30355 |
| chr1:32110268-32110878_mergedPeaks.392_HCRTR1_27273_PEF1_265            | 1.2307<br>13977      | 0.0016<br>96784 | 0.0423<br>30355 |
| chr1:46049425-46049923_mergedPeaks.593_NASP_15_CCDC17_40057             | 1.2689<br>92041      | 0.0016<br>99737 | 0.0423<br>76165 |
| chr10:62118020-62118572_mergedPeaks.4415_C10orf40_397625_ANK3_31338     | 2.7720<br>47349      | 0.0017<br>02363 | 0.0423<br>89208 |
| chr2:131862385-131863099_mergedPeaks.18440_PLEKHB2_323_POTEE_113181     | 1.7006<br>83507      | 0.0017<br>03625 | 0.0423<br>89208 |
| chr1:21766446-21766646_mergedPeaks.244_RP5-1071N3.1_146764_NBPF3_36     | 6.3482<br>2673       | 0.0017<br>04435 | 0.0423<br>89208 |
| chr7:43768958-43769395_mergedPeaks.33269_COA1_36_BLVRA_29095            | 3.5196<br>57142      | 0.0017<br>05133 | 0.0423<br>89208 |
| chr2:186155779-186156207_mergedPeaks.19288_ZNF804A_692901_FSIP2_447361  | -<br>3.7903<br>71936 | 0.0017<br>05846 | 0.0423<br>89208 |
| chr3:56821852-56822123_mergedPeaks.22595_ARHGEF3_12242_AR               | 6.1539<br>04366      | 0.0017<br>09221 | 0.0424<br>32878 |

|                                                                          |                 |                 |                 |
|--------------------------------------------------------------------------|-----------------|-----------------|-----------------|
| HGEF3-AS1_152080                                                         |                 |                 |                 |
| chr2:65743924-65744294_mergedPeaks.17696_SPRED2_150178_MIR4778_841351    | 6.1326<br>16992 | 0.0017<br>10541 | 0.0424<br>32878 |
| chr3:107352298-107353125_mergedPeaks.23207_BBX_110929_LINC00635_244204   | 2.6044<br>62116 | 0.0017<br>10958 | 0.0424<br>32878 |
| chr16:3332739-3333625_mergedPeaks.12643_LINC00921_19415_ZNF263_304       | 1.1029<br>56415 | 0.0017<br>14237 | 0.0424<br>86432 |
| chr6:26923844-26924299_mergedPeaks.30370_ZNF322_264091_GUSBP2_262        | 2.0348<br>51052 | 0.0017<br>23562 | 0.0425<br>93108 |
| chr14:74180948-74181234_mergedPeaks.11173_DNAL1_69514_PNA1_37            | 2.9327<br>30853 | 0.0017<br>24154 | 0.0425<br>93108 |
| chr10:17269958-17270181_mergedPeaks.3885_VIM-AS1_1172_VIM_188            | 3.2297<br>34258 | 0.0017<br>26691 | 0.0426<br>27547 |
| chr20:32699813-32700473_mergedPeaks.20672_EIF2S2_58_ASIP_148027          | 1.1066<br>14027 | 0.0017<br>27795 | 0.0426<br>27547 |
| chr12:89619631-89620117_mergedPeaks.8625_RP11-13A1.1_206405_DUSP6_126762 | 6.9988<br>70055 | 0.0017<br>31517 | 0.0426<br>91616 |
| chr12:7062623-7063266_mergedPeaks.7445_PTPN6_2511_MIR200C_9917           | 1.0603<br>54927 | 0.0017<br>34507 | 0.0427<br>3307  |
| chr9:17531603-17531973_mergedPeaks.37101_CNTLN_396800_SH3GL2_47164       | 6.2303<br>61346 | 0.0017<br>3545  | 0.0427<br>3307  |
| chr16:23690054-23690335_mergedPeaks.12884_DCTN5_37508_PLK1_6             | 6.2659<br>75482 | 0.0017<br>38508 | 0.0427<br>80592 |
| chr15:99191362-99191898_mergedPeaks.12475_FAM169B_134019_IGF1R_1130      | 2.0438<br>99303 | 0.0017<br>39831 | 0.0427<br>85407 |
| chr10:73454372-73454587_mergedPeaks.4594_SLC29A3_375470_C10orf105_25099  | 6.1428<br>11103 | 0.0017<br>42778 | 0.0428<br>30122 |
| chr19:45970826-45971680_mergedPeaks.16535_FOSB_1_RTN2_25250              | 1.2161<br>13619 | 0.0017<br>50287 | 0.0429<br>31898 |
| chr19:12845301-12845729_mergedPeaks.16066_TNPO2_12410_C19orf43_14        | 1.6337<br>8314  | 0.0017<br>50314 | 0.0429<br>31898 |

|                                                                                   |                      |                 |                 |
|-----------------------------------------------------------------------------------|----------------------|-----------------|-----------------|
| chr10:70757472-<br>70757887_mergedPeaks.4564_KIAA1279_9203_SRG<br>N_90148         | 6.7512<br>5105       | 0.0017<br>53531 | 0.0429<br>83042 |
| chr19:45942813-<br>45943355_mergedPeaks.16532_ERCC1_16264_FOSB_<br>28168          | 1.6647<br>34165      | 0.0017<br>56656 | 0.0430<br>31843 |
| chr18:59955109-<br>59955309_mergedPeaks.15566_KIAA1468_100686_<br>TNFRSF11A_37310 | -<br>5.7055<br>94163 | 0.0017<br>61536 | 0.0431<br>21844 |
| chr8:71042778-<br>71043224_mergedPeaks.35653_PRDM14_59439_NC<br>OA2_273019        | 6.1321<br>59611      | 0.0017<br>62603 | 0.0431<br>21844 |
| chr1:25566117-<br>25566744_mergedPeaks.293_SYF2_7417_RSRP1_755<br>5               | 1.7470<br>5088       | 0.0017<br>69233 | 0.0432<br>00486 |
| chr19:2427470-<br>2428029_mergedPeaks.15862_TMPRS9_37966_TIM<br>M13_165           | 1.3593<br>69986      | 0.0017<br>73116 | 0.0432<br>6057  |
| chr19:57751655-<br>57752267_mergedPeaks.16747_AURKC_9534_ZNF80<br>5_91            | 1.5823<br>19185      | 0.0017<br>73974 | 0.0432<br>6057  |
| chr5:132072751-<br>132073587_mergedPeaks.29056_IL4_63492_KIF3A_<br>96             | 1.2003<br>64547      | 0.0017<br>76386 | 0.0432<br>74198 |
| chr8:61590816-<br>61591427_mergedPeaks.35500_RAB2A_161653_CHD<br>7_202            | 1.2164<br>0585       | 0.0017<br>78971 | 0.0432<br>98933 |
| chr1:1167103-<br>1167841_mergedPeaks.12_SDF4_25_B3GALT6_156                       | 1.0155<br>53021      | 0.0017<br>84663 | 0.0434<br>09634 |
| chr7:69812807-<br>69813284_mergedPeaks.33491_AUTS2_749141_WBS<br>CR17_784477      | 2.6595<br>84671      | 0.0017<br>87179 | 0.0434<br>42999 |
| chr11:117685441-<br>117686425_mergedPeaks.7084_DSCAML1_17957_FX<br>YD2_12874      | 1.4503<br>92977      | 0.0017<br>99273 | 0.0437<br>08962 |
| chr9:26812268-<br>26812714_mergedPeaks.37217_LOC100506422_745<br>819_CAAP1_80335  | 6.1544<br>52512      | 0.0018<br>08408 | 0.0438<br>74712 |
| chr13:100153430-<br>100153901_mergedPeaks.10281_TM9SF2_38_CLYBL<br>_105252        | 1.4397<br>06671      | 0.0018<br>099   | 0.0438<br>82843 |
| chr3:134513738-<br>134514426_mergedPeaks.23629_KY_144218_EPHB1<br>_16             | 1.0160<br>98348      | 0.0018<br>12556 | 0.0438<br>98337 |
| chr12:96793946-                                                                   | 1.0804               | 0.0018          | 0.0438          |

|                                                                            |                      |                 |                 |
|----------------------------------------------------------------------------|----------------------|-----------------|-----------------|
| 96794529_mergedPeaks.8799_ELK3_206031_CDK17_129                            | 53835                | 1401            | 98337           |
| chr18:42379804-42380284_mergedPeaks.15321_SETBP1_119182_MIR4319_170087     | 3.2407<br>37247      | 0.0018<br>23067 | 0.0440<br>5695  |
| chr1:227012691-227013033_mergedPeaks.3197_ITPKB_85986_PSEN2_45410          | 6.3822<br>97107      | 0.0018<br>24216 | 0.0440<br>5695  |
| chr10:101769301-101769945_mergedPeaks.5006_DNMBP-AS1_82658_DNMBP_53        | 1.1840<br>34402      | 0.0018<br>27653 | 0.0440<br>87923 |
| chrX:148227310-148227800_mergedPeaks.39673_AFF2_645417_IDS_359329          | 6.2825<br>0123       | 0.0018<br>28962 | 0.0440<br>91468 |
| chr13:27998502-27998992_mergedPeaks.9411_GTF3A_67_MTIF3_25579              | 2.1157<br>53595      | 0.0018<br>3024  | 0.0440<br>94253 |
| chr17:27620736-27621456_mergedPeaks.14181_CRYBA1_47222_NUFIP2_70           | 1.0583<br>71061      | 0.0018<br>34332 | 0.0441<br>40825 |
| chr4:184208401-184209399_mergedPeaks.27196_WWC2_188438_CLDN22_33027        | -<br>1.3203<br>78492 | 0.0018<br>34499 | 0.0441<br>40825 |
| chr6:99328315-99328900_mergedPeaks.31369_POU3F2_46028_FBXL4_67275          | 2.5975<br>33114      | 0.0018<br>37208 | 0.0441<br>44908 |
| chr16:2563475-2564148_mergedPeaks.12615_TBC1D24_38665_ATP6VOC_59           | 1.0702<br>43367      | 0.0018<br>38061 | 0.0441<br>44908 |
| chr7:116610569-116611159_mergedPeaks.34206_ST7-AS1_16476_MIR6132_49400     | 6.0337<br>40934      | 0.0018<br>38159 | 0.0441<br>44908 |
| chr4:147407725-147408038_mergedPeaks.26624_MIR7849_78147_SLC10A7_35242     | 6.2368<br>98625      | 0.0018<br>41815 | 0.0442<br>04724 |
| chr22:24236281-24237001_mergedPeaks.21414_MIF_77_LOC284889_4476            | 1.7107<br>23492      | 0.0018<br>45559 | 0.0442<br>38628 |
| chr16:75182186-75183068_mergedPeaks.13540_ZFP1_207_CTRB2_58445             | 1.1298<br>49072      | 0.0018<br>5175  | 0.0443<br>31018 |
| chr4:65748445-65748869_mergedPeaks.25429_TECRL_473479_RP11-707A18.1_121561 | 6.1259<br>42983      | 0.0018<br>66383 | 0.0446<br>53154 |
| chr13:78102918-                                                            | 1.9034               | 0.0018          | 0.0446          |

|                                                                               |                      |                 |                 |
|-------------------------------------------------------------------------------|----------------------|-----------------|-----------------|
| 78103512_mergedPeaks.10002_MYCBP2_202038_SC<br>EL_6593                        | 20097                | 7153            | 73511           |
| chr2:74425395-<br>74426448_mergedPeaks.17827_MTHFD2_232_SLC4A<br>5_116231     | 1.4740<br>18784      | 0.0018<br>72041 | 0.0446<br>73511 |
| chr9:33816534-<br>33817310_mergedPeaks.37298_PRSS3_66104_UBE2<br>R2_259       | 1.2276<br>09751      | 0.0018<br>72896 | 0.0446<br>73511 |
| chr8:29265914-<br>29266351_mergedPeaks.35131_DUSP4_59810_LINC<br>00589_339493 | -<br>2.5040<br>89325 | 0.0018<br>75321 | 0.0446<br>97909 |
| chr15:101481066-<br>101481273_mergedPeaks.12522_LRRK1_21710_CHS<br>Y1_310968  | 6.2669<br>97558      | 0.0018<br>80483 | 0.0447<br>92807 |
| chr17:46102346-<br>46102894_mergedPeaks.14412_CDK5RAP3_54299_<br>MIR152_11993 | 1.0514<br>69153      | 0.0018<br>82835 | 0.0448<br>20688 |
| chr9:77111886-<br>77112207_mergedPeaks.37522_ANXA1_1345266_RO<br>RB_205       | 6.2158<br>9542       | 0.0018<br>85087 | 0.0448<br>39116 |
| chr1:217668553-<br>217668965_mergedPeaks.2995_ESRRG_690050_GPA<br>TCH2_135650 | 3.3585<br>93755      | 0.0018<br>91848 | 0.0449<br>22514 |
| chrX:41696470-<br>41697088_mergedPeaks.38803_GPR82_113372_CAS<br>K_85508      | 2.3406<br>53392      | 0.0019<br>01759 | 0.0450<br>20376 |
| chr3:171527463-<br>171527943_mergedPeaks.24203_TNIK_349506_PLD<br>1_581       | 2.0622<br>76622      | 0.0019<br>02042 | 0.0450<br>20376 |
| chr4:15656690-<br>15657350_mergedPeaks.24878_CC2D2A_185532_FB<br>XL5_15       | 1.2763<br>41971      | 0.0019<br>0237  | 0.0450<br>20376 |
| chr19:10712871-<br>10713285_mergedPeaks.16014_AP1M2_15087_SLC4<br>4A2_23092   | 1.5403<br>58432      | 0.0019<br>03372 | 0.0450<br>20376 |
| chr15:74907818-<br>74908306_mergedPeaks.12139_CLK3_728_EDC3_80<br>324         | 1.5798<br>79783      | 0.0019<br>04675 | 0.0450<br>20376 |
| chr19:13213584-<br>13213998_mergedPeaks.16082_NFIX_78397_LYL1_1<br>83         | 2.6543<br>4318       | 0.0019<br>04931 | 0.0450<br>20376 |
| chr1:198322013-<br>198322901_mergedPeaks.2607_NEK7_196350_ATP6<br>V1G3_187618 | 1.9802<br>76292      | 0.0019<br>06648 | 0.0450<br>20376 |
| chr11:65313809-                                                               | 1.4810               | 0.0019          | 0.0451          |



|                                                                         |                      |                 |                 |
|-------------------------------------------------------------------------|----------------------|-----------------|-----------------|
| 65314414_mergedPeaks.6361_SCYL1_21564_LTBP3_11588                       | 62296                | 12006           | 18833           |
| chr6:99968721-99969458_mergedPeaks.31386_TSTD3_220_CCNC_47601           | -<br>1.1057<br>62293 | 0.0019<br>16846 | 0.0452<br>04915 |
| chr3:113548849-113549111_mergedPeaks.23323_ATP6V1A_83115_GRAMD1C_8700   | 6.3736<br>21818      | 0.0019<br>22728 | 0.0452<br>87341 |
| chr15:96601428-96602138_mergedPeaks.12454_LINC00924_625462_NR2F2_267373 | 6.1365<br>7825       | 0.0019<br>29675 | 0.0454<br>22775 |
| chr8:30515370-30516060_mergedPeaks.35153_SMIM18_19599_GTF2E2_23         | 1.0805<br>63938      | 0.0019<br>379   | 0.0455<br>88107 |
| chr5:112849095-112849820_mergedPeaks.28718_YTHDC2_67_KCNN2_919769       | 1.9334<br>35485      | 0.0019<br>46539 | 0.0457<br>34627 |
| chr1:6259451-6260109_mergedPeaks.75_RPL22_101_RNF207_6408               | 1.3324<br>66073      | 0.0019<br>47761 | 0.0457<br>35027 |
| chr14:68086256-68086756_mergedPeaks.11091_PIGH_19489_ARG2_72            | 2.5129<br>12528      | 0.0019<br>55305 | 0.0458<br>44653 |
| chr1:167599293-167599571_mergedPeaks.2095_CREG1_76376_RCSD1_41          | 2.8188<br>17741      | 0.0019<br>55346 | 0.0458<br>44653 |
| chr6:16128980-16129799_mergedPeaks.30160_MYLIP_73_MIR4639_12397         | 1.0815<br>07414      | 0.0019<br>57145 | 0.0458<br>44653 |
| chr7:99680141-99680547_mergedPeaks.33921_ZNF3_957_COPS6_6238            | 1.9255<br>44636      | 0.0019<br>58471 | 0.0458<br>44653 |
| chr8:109973787-109974149_mergedPeaks.36290_TMEM74_174198_TRHR_125684    | 6.0292<br>2227       | 0.0019<br>61935 | 0.0458<br>86448 |
| chr1:151735806-151736106_mergedPeaks.1775_OAZ3_512_MRPL9_84             | 3.3024<br>62361      | 0.0019<br>63387 | 0.0458<br>86448 |
| chr12:70636432-70637747_mergedPeaks.8373_RAB3IP_464358_CNO_T2_404       | 1.0857<br>6779       | 0.0019<br>63884 | 0.0458<br>86448 |
| chr19:41115796-41116234_mergedPeaks.16436_LTBP4_8739_NUMB_L_80548       | 1.8595<br>25419      | 0.0019<br>65353 | 0.0458<br>925   |
| chrX:20242859-                                                          | 6.0439               | 0.0019          | 0.0460          |

|                                                                                   |                      |                 |                 |
|-----------------------------------------------------------------------------------|----------------------|-----------------|-----------------|
| 20243457_mergedPeaks.38605	EIF1AX_83192_RPS6<br>KA3_41592                         | 81927                | 72071           | 15357           |
| chr6:126762014-<br>126762437_mergedPeaks.31816_CENPW_101291_RS<br>PO3_677822      | -<br>3.0763<br>35837 | 0.0019<br>7304  | 0.0460<br>15357 |
| chr12:88785398-<br>88785675_mergedPeaks.8615_TMTC3_249464_KITL<br>G_188714        | 6.1247<br>89757      | 0.0019<br>75713 | 0.0460<br>29106 |
| chr17:25659480-<br>25660315_mergedPeaks.14134_WSB1_38792_TBC1<br>D3P5_85133       | 1.3372<br>15657      | 0.0019<br>76055 | 0.0460<br>29106 |
| chr7:137660002-<br>137660243_mergedPeaks.34531_AC022173.2_22029<br>_CREB3L2_26725 | 6.2221<br>00285      | 0.0019<br>78569 | 0.0460<br>59389 |
| chr14:91371881-<br>91372295_mergedPeaks.11364_TTC7B_89327_RPS6<br>KA5_154905      | 6.1304<br>50561      | 0.0019<br>80718 | 0.0460<br>81139 |
| chr1:28995029-<br>28995677_mergedPeaks.370_GMEB1_114_YTHDF2_6<br>8098             | 1.2521<br>32381      | 0.0019<br>88299 | 0.0462<br>29177 |
| chr12:125030080-<br>125030586_mergedPeaks.9226_MIR6880_208545_N<br>COR2_21677     | -<br>1.7640<br>5109  | 0.0019<br>90984 | 0.0462<br>50572 |
| chr19:45926612-<br>45927264_mergedPeaks.16531_ERCC1_118_FOSB_44<br>314            | 1.3789<br>04412      | 0.0019<br>92313 | 0.0462<br>50572 |
| chr19:36618687-<br>36619022_mergedPeaks.16343_POLR2I_12648_CAP<br>NS1_12063       | 3.0841<br>89793      | 0.0019<br>92876 | 0.0462<br>50572 |
| chr16:27461209-<br>27461562_mergedPeaks.12930_IL21R_47903_IL21R-<br>AS1_3329      | 6.5309<br>59026      | 0.0020<br>01153 | 0.0464<br>14281 |
| chr10:85631280-<br>85631605_mergedPeaks.4758_NRG3_1996373_GHIT<br>M_267742        | 6.0399<br>7342       | 0.0020<br>03924 | 0.0464<br>29472 |
| chr19:11532917-<br>11533174_mergedPeaks.16033_RGL3_3027_CCDC15<br>1_12935         | 6.5449<br>6998       | 0.0020<br>05575 | 0.0464<br>29472 |
| chr11:118868542-<br>118869022_mergedPeaks.7109_FOXR1_26366_CCDC<br>84_60          | 1.7114<br>57424      | 0.0020<br>12628 | 0.0464<br>29472 |
| chr1:220267182-<br>220267777_mergedPeaks.3031_IARS2_25_MIR215_2<br>3825           | 1.3303<br>63818      | 0.0020<br>13242 | 0.0464<br>29472 |
| chr12:93381601-                                                                   | 1.9232               | 0.0020          | 0.0464          |

|                                                                             |                      |                 |                 |
|-----------------------------------------------------------------------------|----------------------|-----------------|-----------------|
| 93382177_mergedPeaks.8716_EEA1_58782_RP11-486A14.2_389623                   | 12153                | 14756           | 29472           |
| chr5:72959681-72960000_mergedPeaks.28088_UTP15_98275_ARHG_EF28_149502       | 6.1622<br>74745      | 0.0020<br>1491  | 0.0464<br>29472 |
| chr4:39355040-39355771_mergedPeaks.25158_WDR19_171382_RF_C1_12596           | 2.2538<br>42552      | 0.0020<br>16542 | 0.0464<br>29472 |
| chr6:97107230-97107678_mergedPeaks.31348_FHL5_97031_GPR63_177899            | 6.4674<br>07706      | 0.0020<br>16671 | 0.0464<br>29472 |
| chr6:131350971-131351370_mergedPeaks.31903_EPB41L2_29263_A_KAP7_220128      | 6.0399<br>74016      | 0.0020<br>16999 | 0.0464<br>29472 |
| chr13:66712330-66713085_mergedPeaks.9861_LINC00395_2400556_PCDH9-AS2_686593 | -<br>1.0045<br>47966 | 0.0020<br>19922 | 0.0464<br>29472 |
| chr7:7298485-7298728_mergedPeaks.32738_LOC101927354_3822_COL28A1_276854     | 6.0359<br>52442      | 0.0020<br>21961 | 0.0464<br>29472 |
| chr5:35229390-35229856_mergedPeaks.27632_PRLR_111399_SPEF2_388365           | 6.4584<br>65217      | 0.0020<br>24266 | 0.0464<br>29472 |
| chr1:24513680-24513930_mergedPeaks.276_IFNLR1_40_RP11-10N16.2_12924         | 6.5479<br>49961      | 0.0020<br>24405 | 0.0464<br>29472 |
| chr2:225811767-225811978_mergedPeaks.20002_DOCK10_90_MIR4439_63385          | 6.0359<br>40134      | 0.0020<br>24962 | 0.0464<br>29472 |
| chr11:88070593-88071105_mergedPeaks.6695_RAB38_162214_CTSC_92               | 1.3419<br>30952      | 0.0020<br>26912 | 0.0464<br>29472 |
| chr13:49323839-49324384_mergedPeaks.9711_CYSLTR2_43161_FND_C3A_360327       | 2.7345<br>8032       | 0.0020<br>2777  | 0.0464<br>29472 |
| chr6:44703499-44703751_mergedPeaks.30667_MIR4642_300248_MIR586_461882       | 6.3240<br>57251      | 0.0020<br>2854  | 0.0464<br>29472 |
| chr17:65989540-65990117_mergedPeaks.14654_C17orf58_63_KPNA2_42019           | 1.2701<br>72966      | 0.0020<br>371   | 0.0465<br>67251 |
| chr15:94003908-94004258_mergedPeaks.12413_RGMA_371640_MCTP2_895080          | -<br>5.6837<br>54319 | 0.0020<br>37918 | 0.0465<br>67251 |
| chr20:5824917-                                                              | 3.4461               | 0.0020          | 0.0465          |

|                                                                                   |                      |                 |                 |
|-----------------------------------------------------------------------------------|----------------------|-----------------|-----------------|
| 5825457_mergedPeaks.20360_C20orf196_94145_CH<br>GB_66786                          | 45056                | 38429           | 67251           |
| chr11:8615341-<br>8615989_mergedPeaks.5614_STK33_110_TRIM66_64<br>718             | 3.2985<br>88032      | 0.0020<br>44725 | 0.0466<br>54894 |
| chr5:59607921-<br>59608153_mergedPeaks.27913_PDE4D_1312278_PA<br>RT1_175721       | -<br>5.7165<br>43069 | 0.0020<br>4999  | 0.0467<br>30177 |
| chr11:14330502-<br>14330972_mergedPeaks.5704_SPON1_346554_RRAS<br>2_49993         | 6.1423<br>74297      | 0.0020<br>50661 | 0.0467<br>30177 |
| chr19:36869861-<br>36870306_mergedPeaks.16348_LINC00665_47463_Z<br>FP14_22        | 3.0624<br>51945      | 0.0020<br>51719 | 0.0467<br>30177 |
| chr7:12362467-<br>12362889_mergedPeaks.32799_TMEM106B_111831<br>_VWDE_81174       | 6.0358<br>17328      | 0.0020<br>55316 | 0.0467<br>84016 |
| chr4:34711226-<br>34711511_mergedPeaks.25071_PCDH7_3989339_AR<br>AP2_1534611      | 6.3665<br>08371      | 0.0020<br>58917 | 0.0468<br>37378 |
| chr20:48807315-<br>48807563_mergedPeaks.20865_CEBPB_320_RP11-<br>290F20.3_76583   | 3.5412<br>89265      | 0.0020<br>60129 | 0.0468<br>37378 |
| chr3:79317447-<br>79318061_mergedPeaks.22889_ROBO1_249145_LOC<br>101927374_143122 | 1.6882<br>3766       | 0.0020<br>65046 | 0.0469<br>04011 |
| chr4:127817216-<br>127817566_mergedPeaks.26348_MIR2054_1388978<br>_INTU_736695    | 6.0443<br>85906      | 0.0020<br>65532 | 0.0469<br>04011 |
| chr12:122356325-<br>122356529_mergedPeaks.9187_PSMD9_29791_WDR<br>66_35           | 6.3157<br>99088      | 0.0020<br>70706 | 0.0469<br>62748 |
| chr16:67204088-<br>67204806_mergedPeaks.13347_HSF4_7160_NOL3_3<br>308             | 1.9366<br>20586      | 0.0020<br>71118 | 0.0469<br>62748 |
| chr17:7232501-<br>7233241_mergedPeaks.13970_NEURL4_233_ACAP1_<br>6976             | 1.0822<br>79072      | 0.0020<br>71831 | 0.0469<br>62748 |
| chr4:2788864-<br>2789513_mergedPeaks.24728_TNIP2_31085_SH3BP<br>2_5561            | 1.3753<br>02884      | 0.0020<br>75794 | 0.0469<br>863   |
| chr12:68042332-<br>68042847_mergedPeaks.8318_DYRK2_78_RP11-<br>43N5.1_80666       | 1.9002<br>27828      | 0.0020<br>76258 | 0.0469<br>863   |
| chr11:62538591-                                                                   | 1.0886               | 0.0020          | 0.0469          |

|                                                                                   |                     |                 |                 |
|-----------------------------------------------------------------------------------|---------------------|-----------------|-----------------|
| 62539311_mergedPeaks.6289_TAF6L_177_TMEM17<br>9B_15922                            | 24696               | 76585           | 863             |
| chr12:52444760-<br>52445429_mergedPeaks.8086_GRASP_40819_NR4A1<br>_91             | 1.3201<br>13168     | 0.0020<br>77846 | 0.0469<br>86801 |
| chr17:20058936-<br>20059564_mergedPeaks.14113_AKAP10_178081_SP<br>ECC1_56         | 1.2987<br>47985     | 0.0020<br>8573  | 0.0471<br>37    |
| chr17:79481658-<br>79482173_mergedPeaks.14862_ACTG1_2023_FSCN2<br>_13501          | 1.1149<br>07485     | 0.0020<br>91426 | 0.0472<br>33795 |
| chr11:118888851-<br>118889550_mergedPeaks.7110_RPS25_143_TRAPPC<br>4_40           | 1.3136<br>36723     | 0.0020<br>97997 | 0.0472<br>33795 |
| chr19:21541998-<br>21542222_mergedPeaks.16243_ZNF738_376_ZNF49<br>3_37810         | 6.3157<br>00785     | 0.0020<br>99043 | 0.0472<br>33795 |
| chr17:53045642-<br>53046415_mergedPeaks.14474_TOM1L1_67977_COX<br>11_36           | 1.7857<br>42113     | 0.0020<br>99242 | 0.0472<br>33795 |
| chr8:6698227-<br>6698427_mergedPeaks.34858_XKR5_5161_DEFB1_3<br>7202              | 6.1558<br>07868     | 0.0020<br>99971 | 0.0472<br>33795 |
| chr1:183559448-<br>183560320_mergedPeaks.2410_NCF2_145_ARPC5_4<br>5192            | 1.1743<br>50386     | 0.0021<br>01686 | 0.0472<br>34233 |
| chr8:80557770-<br>80558292_mergedPeaks.35808_STMN2_34983_HEY1<br>_120679          | 6.1358<br>64519     | 0.0021<br>0248  | 0.0472<br>34233 |
| chr5:68485185-<br>68485806_mergedPeaks.28046_CENPH_121_MRPS3<br>6_28077           | 3.2266<br>35951     | 0.0021<br>10706 | 0.0473<br>8344  |
| chr8:74056916-<br>74057372_mergedPeaks.35710_SBSPON_51637_LOC<br>100130301_114593 | -<br>2.4779<br>7342 | 0.0021<br>11619 | 0.0473<br>8344  |
| chr17:8093360-<br>8093848_mergedPeaks.13998_C17orf59_40_AURKB_<br>20340           | 1.0703<br>37706     | 0.0021<br>14766 | 0.0473<br>9962  |
| chr9:100745356-<br>100745816_mergedPeaks.37776_ANP32B_98_NANS_<br>73372           | 1.4264<br>14602     | 0.0021<br>14839 | 0.0473<br>9962  |
| chr11:58939386-<br>58939853_mergedPeaks.6215_FAM111A_29302_DTX<br>4_192           | 1.7410<br>76502     | 0.0021<br>17585 | 0.0474<br>33145 |
| chr7:65669986-                                                                    | 1.7797              | 0.0021          | 0.0475          |

|                                                                            |                      |                 |                 |
|----------------------------------------------------------------------------|----------------------|-----------------|-----------------|
| 65670496_mergedPeaks.33443_CRCP_90437_TPST1_17                             | 52079                | 26175           | 8584            |
| chr1:153643318-153643901_mergedPeaks.1801_ILF2_105_NPR1_7554               | 1.2294<br>98104      | 0.0021<br>2691  | 0.0475<br>8584  |
| chr12:94541898-94542655_mergedPeaks.8742_RP11-887P2.5_410677_PLXNC1_114020 | 1.3406<br>19681      | 0.0021<br>31007 | 0.0476<br>18839 |
| chr12:65582692-65583243_mergedPeaks.8284_LEMD3_19617_MSRB3_89455           | 6.1294<br>31673      | 0.0021<br>31387 | 0.0476<br>18839 |
| chr4:95489110-95489365_mergedPeaks.25863_PDLIM5_116230_BMPR1B_428145       | -<br>5.7049<br>16372 | 0.0021<br>32149 | 0.0476<br>18839 |
| chr17:40761206-40761883_mergedPeaks.14329_FAM134C_99_TUBG2_49721           | 1.1094<br>56487      | 0.0021<br>39726 | 0.0477<br>59941 |
| chr6:164133328-164133582_mergedPeaks.32520_QKI_297781_C6orf118_1589656     | -<br>2.5851<br>63275 | 0.0021<br>4797  | 0.0478<br>74703 |
| chr16:55867896-55868456_mergedPeaks.13185_CES1_1101_CES5A_41106            | 6.1171<br>65485      | 0.0021<br>49391 | 0.0478<br>74703 |
| chr1:948456-949112_mergedPeaks.5_HES4_13232_ISG15_62                       | 1.9530<br>44415      | 0.0021<br>50437 | 0.0478<br>74703 |
| chr20:30200580-30200964_mergedPeaks.20641_MIR3193_5784_COX4I2_24918        | 2.2343<br>72707      | 0.0021<br>51871 | 0.0478<br>74703 |
| chr3:47017889-47018522_mergedPeaks.22449_PTH1R_94467_CCDC12_52             | 1.0469<br>35264      | 0.0021<br>52438 | 0.0478<br>74703 |
| chr5:149379730-149380354_mergedPeaks.29361_SLC26A2_39743_HMGXB3_126        | 1.5088<br>12968      | 0.0021<br>55619 | 0.0479<br>17367 |
| chr1:59433943-59434688_mergedPeaks.742_LINC01135_183493_RP4-794H19.4_51832 | 2.0976<br>37344      | 0.0021<br>59856 | 0.0479<br>83448 |
| chr2:132431544-132431910_mergedPeaks.18452_LINC01087_37130_C2orf27A_48336  | -<br>2.2354<br>65926 | 0.0021<br>61503 | 0.0479<br>91936 |
| chr12:106751297-106752148_mergedPeaks.8975_POLR3B_287_RFX4_224962          | 1.1000<br>41362      | 0.0021<br>67001 | 0.0480<br>85878 |
| chr7:10746511-10746936_mergedPeaks.32780_PER4_1072824_NDU                  | 3.3314<br>4814       | 0.0021<br>68995 | 0.0480<br>89008 |

|                                                                                    |                      |                 |                 |
|------------------------------------------------------------------------------------|----------------------|-----------------|-----------------|
| FA4_233090                                                                         |                      |                 |                 |
| chr14:50787794-<br>50788262_mergedPeaks.10822_ATP5S_8982_CDKL1_76094               | 2.3477<br>6498       | 0.0021<br>71046 | 0.0480<br>91277 |
| chr6:27720796-<br>27721244_mergedPeaks.30389_LINC01012_59207_L<br>OC100131289_8502 | 1.8089<br>8287       | 0.0021<br>74125 | 0.0481<br>31377 |
| chr17:16283877-<br>16284734_mergedPeaks.14061_CENPV_27493_UBB_298                  | 1.0357<br>58499      | 0.0021<br>84916 | 0.0482<br>97386 |
| chr3:5247031-<br>5247728_mergedPeaks.21804_EDEM1_18021_MIR47<br>90_44561           | 2.1010<br>99578      | 0.0021<br>8636  | 0.0482<br>97386 |
| chr5:92413831-<br>92414777_mergedPeaks.28378_ARRDC3_1735155_N<br>R2F1-AS1_502722   | 1.7112<br>22557      | 0.0021<br>86715 | 0.0482<br>97386 |
| chr7:93671777-<br>93672058_mergedPeaks.33814_BET1_38227_COL1A<br>2_351955          | 6.0399<br>81257      | 0.0021<br>88338 | 0.0483<br>0512  |
| chr7:139762407-<br>139763051_mergedPeaks.34578_TBXAS1_233778_P<br>ARP12_792        | 1.5913<br>64362      | 0.0021<br>994   | 0.0485<br>02027 |
| chr3:119395841-<br>119396629_mergedPeaks.23424_POPDC2_16831_CO<br>X17_8            | 1.2261<br>01783      | 0.0021<br>99855 | 0.0485<br>02027 |
| chr17:55532285-<br>55532936_mergedPeaks.14519_MS12_198680_RP11-<br>118E18.2_68348  | 1.5817<br>4971       | 0.0022<br>01093 | 0.0485<br>02027 |
| chr12:118620894-<br>118621266_mergedPeaks.9119_PEBP1_47211_TAOK<br>3_189670        | -<br>6.0209<br>59571 | 0.0022<br>10027 | 0.0486<br>42395 |
| chr17:34136069-<br>34136754_mergedPeaks.14239_MMP28_13771_TAF<br>15_47             | 1.0965<br>89263      | 0.0022<br>12867 | 0.0486<br>76666 |
| chr6:24403043-<br>24403559_mergedPeaks.30299_MRS2_166_GPLD1_8<br>6549              | 2.6888<br>2331       | 0.0022<br>16326 | 0.0486<br>96288 |
| chr17:47773483-<br>47773851_mergedPeaks.14436_SPOP_18142_SLC35<br>B1_11646         | 3.5935<br>86683      | 0.0022<br>25914 | 0.0488<br>71641 |
| chr2:199236587-<br>199237305_mergedPeaks.19567_PLCL1_567521_AC<br>005235.1_2875    | 2.0726<br>45692      | 0.0022<br>26883 | 0.0488<br>71641 |
| chr10:85363201-<br>85363905_mergedPeaks.4756_NRG3_1728484_GHIT                     | 6.0305<br>60278      | 0.0022<br>30046 | 0.0489<br>12768 |

|                                                                                       |                      |                 |                 |
|---------------------------------------------------------------------------------------|----------------------|-----------------|-----------------|
| M_535631                                                                              |                      |                 |                 |
| chr3:159745246-<br>159745977_mergedPeaks.24028_LINC01100_7176_I<br>L12A-AS1_179268    | 2.6032<br>39203      | 0.0022<br>34389 | 0.0489<br>79714 |
| chr7:114562736-<br>114563484_mergedPeaks.34167_MDFIC_902_TFEC_1<br>107757             | 1.9055<br>36318      | 0.0022<br>40527 | 0.0490<br>85913 |
| chr1:179262638-<br>179263219_mergedPeaks.2330_SOAT1_80_AXDND1_<br>71926               | 1.1632<br>66414      | 0.0022<br>42029 | 0.0490<br>90478 |
| chr20:5986347-<br>5986973_mergedPeaks.20363_LOC101929225_193_<br>CRLS1_1237           | 1.7030<br>87011      | 0.0022<br>53131 | 0.0492<br>94143 |
| chr7:44529926-<br>44530341_mergedPeaks.33285_CAMK2B_164903_N<br>UDCD3_252             | 2.3783<br>63586      | 0.0022<br>55503 | 0.0492<br>94143 |
| chr3:110533074-<br>110533416_mergedPeaks.23255_LINC01205_14044<br>09_PVRL3-AS1_255561 | 6.1286<br>66744      | 0.0022<br>56527 | 0.0492<br>94143 |
| chr1:32802920-<br>32803267_mergedPeaks.407_MARCKSL1_1253_FAM<br>229A_24751            | 3.3032<br>53351      | 0.0022<br>67486 | 0.0494<br>59095 |
| chr15:31528295-<br>31528701_mergedPeaks.11644_RP11-<br>16E12.2_5448_KLF13_90584       | 6.2282<br>28694      | 0.0022<br>67989 | 0.0494<br>59095 |
| chr2:157236698-<br>157237263_mergedPeaks.18838_NR4A2_47693_GPD<br>2_55919             | 2.5456<br>63085      | 0.0022<br>72693 | 0.0494<br>78137 |
| chr12:125405727-<br>125406166_mergedPeaks.9242_MIR5188_5854_DHX<br>37_67721           | 1.5900<br>50829      | 0.0022<br>72774 | 0.0494<br>78137 |
| chr4:113514665-<br>113515140_mergedPeaks.26140_NEUROG2_77574_L<br>ARP7_43217          | 6.2985<br>51688      | 0.0022<br>76646 | 0.0495<br>3401  |
| chr2:56424969-<br>56425449_mergedPeaks.17537_CCDC85A_13952_VR<br>K2_1709576           | 6.0452<br>0541       | 0.0022<br>8084  | 0.0495<br>96826 |
| chr9:116341262-<br>116341604_mergedPeaks.38013_RGS3_77727_ZNF6<br>18_297128           | -<br>1.5824<br>34711 | 0.0022<br>8604  | 0.0496<br>24578 |
| chr19:35739204-<br>35739859_mergedPeaks.16311_FAM187B_19903_LS<br>R_27                | 1.5003<br>08585      | 0.0022<br>86097 | 0.0496<br>24578 |
| chr7:129592399-<br>129592996_mergedPeaks.34421_MIR183_177843_U                        | 1.6003<br>47363      | 0.0022<br>86491 | 0.0496<br>24578 |



|                                                                             |                 |                 |                 |
|-----------------------------------------------------------------------------|-----------------|-----------------|-----------------|
| BE2H_103                                                                    |                 |                 |                 |
| chr11:35147970-35148333_mergedPeaks.6012_MIR1343_184768_CD44_12265          | 6.1284<br>75386 | 0.0022<br>89616 | 0.0496<br>24578 |
| chr13:90408040-90408386_mergedPeaks.10145_LINC00353_191546_LINC00559_363758 | 6.0564<br>73353 | 0.0022<br>9117  | 0.0496<br>24578 |
| chr13:41019477-41020100_mergedPeaks.9572_LINC00548_225149_LINC00598_35355   | 1.3338<br>43771 | 0.0022<br>91271 | 0.0496<br>24578 |
| chr14:73715261-73715495_mergedPeaks.11164_PAPLN_11174_NUMB_209908           | 6.1565<br>51057 | 0.0022<br>94825 | 0.0496<br>73208 |
| chr22:19109767-19110309_mergedPeaks.21363_DGCR2_71_TSSK2_8282               | 1.1914<br>61139 | 0.0022<br>96201 | 0.0496<br>74666 |
| chr16:70771404-70771935_mergedPeaks.13454_MTSS1L_51715_VAC14-AS1_17293      | 2.2845<br>99404 | 0.0023<br>02184 | 0.0497<br>47371 |
| chr2:48675476-48676144_mergedPeaks.17463_PPP1R21_7903_STON1_81497           | 2.6039<br>74508 | 0.0023<br>08355 | 0.0498<br>39944 |
| chr3:122512457-122512805_mergedPeaks.23501_PARP14_112960_HSPBAP1_35         | 2.1756<br>60867 | 0.0023<br>09095 | 0.0498<br>39944 |
| chr7:101855096-101855353_mergedPeaks.33966_CUX1_396041_SH2B2_73128          | 6.1492<br>45385 | 0.0023<br>13015 | 0.0498<br>96156 |

| <b>Table2: Gene Ontology (GO) Analysis in G1 high more accessilbe regions</b> |                                         |
|-------------------------------------------------------------------------------|-----------------------------------------|
| Gene Ontology (GO)                                                            | Term Name                               |
| GO Molecular function                                                         | transferase activity                    |
| GO Molecular function                                                         | acetyltransferase activity              |
| GO Molecular function                                                         | ubiquitin-protein                       |
| GO Molecular function                                                         | histone acetyltransferase               |
| GO Molecular function                                                         | N-acetyltransferase activity            |
| GO Molecular function                                                         | androgen receptor                       |
| GO Biological Process                                                         | mRNA metabolic                          |
| GO Biological Process                                                         | symbiosis                               |
| GO Biological Process                                                         | RNA processing                          |
| GO Biological Process                                                         | modification of morphology              |
| GO Biological Process                                                         | multi-organism cellular process         |
| GO Biological Process                                                         | modification of morphology              |
| GO Biological Process                                                         | interaction with host                   |
| GO Biological Process                                                         | termination of RNA                      |
| GO Biological Process                                                         | modulation by virus of host             |
| GO Biological Process                                                         | modification by symbiont of host        |
| GO Biological Process                                                         | mRNA processing                         |
| GO Biological Process                                                         | mRNA splicing                           |
| GO Biological Process                                                         | RNA splicing                            |
| GO Biological Process                                                         | Golgi vesicle                           |
| GO Biological Process                                                         | RNA splicing                            |
| GO Biological Process                                                         | ER to Golgi vesicle-mediated transport  |
| GO Biological Process                                                         | regulation of multi-organism process    |
| GO Biological Process                                                         | regulation of cell cycle                |
| GO Biological Process                                                         | histone modification                    |
| GO Biological Process                                                         | posttranscriptional regulation of gene  |
| GO Cellular Component                                                         | nuclear body                            |
| GO Cellular Component                                                         | exon-exonjunction                       |
| GO Cellular Component                                                         | nuclear speck                           |
| GO Cellular Component                                                         | ER to Golgi transport vesicle membrane  |
| GO Cellular Component                                                         | Component cis-Golgi network             |
| GO Cellular Component                                                         | Component ER to Golgi transport vesicle |
